# Supplementary material
Source: PubMed Central journal article supplement (PMC6571463)

## **Electronic Supplementary information for:**

### **Olfactory Receptor Repertoire Size in Dinosaurs**

Graham M. Hughes\*<sup>1</sup>, John A. Finarelli<sup>1,2</sup>.

\*Corresponding author: g.hughes@ucd.ie

<sup>1</sup>*School of Biology and Environmental Science, University College Dublin, Belfield,  
Dublin 4, Ireland*

<sup>2</sup>*Earth Institute, University College Dublin, Belfield, Dublin 4, Ireland*

## Supplementary Methods

### *Olfactory receptor gene sequences*

OR genes were mined from raw genome files for each extant target avian taxon. OR sequences were initially mined by mapping all RefSeq query genes to a target reference with blastx [1]. Blast best-hit regions were extended 500bp up and downstream, investigated for OR sequences and assigned to specific gene subfamilies using Hidden Markov Models (HMMs) via the Olfactory Receptor Assigner (ORA [2]). Putative pseudogenes less than 150bp in length were excluded. OR sequences from a number of non-avian sauropsid taxa, (hereafter: ‘sauropsids’; *Alligator sinensis*, *Alligator mississippiensis*, *Chrysemys picta*, *Anolis carolinensis*, *Python molurus*) were also downloaded [3-7]. Additionally, the genome of the American alligator, *Alligator mississippiensis*, was mined for OR sequences.

### *Estimation of ancestral ORs using shared identity*

To estimate the minimum number of ancestral OR gene numbers in the dinosaurs, OR sequences from the five sauropsid species mapped to avian ORs using tblastx [1]. Given that the same OR genes may be present in all five, only representative orthologs were used, determined by clustering sequences with 80% shared identity (cd-hit [8]) and choosing one template per cluster, based on the longest sequence. To account for more than 200 MY [9] since the divergence of Aves, subsequent operational thresholds of 65% shared identity and 50% gene coverage were used to infer orthology across both lineages and thus presence in the ancestral dinosaur genome. We further explored OR gene families whose binding odorant ligands are known, and have been verified in human and mouse (de-orphaned), to identify the potential odorant-space [10-12] that was perceivable by extinct dinosaur taxa.

### *Olfactory bulb ratio correlations*

Correlations of the OB ratio with dietary niche and log body mass were investigated across taxa (n = 74, diet data not available for both *Lithornis* sp., no body mass available for *Viavenator* or *Pawpawsaurus*) using Phylogenetic Generalized Least Squares (PGLS), with a null Brownian motion (BM) model of trait evolution in the R packages ‘ape’ [13] and ‘nlme’ [14]. Correlation between body mass and OB ratio was investigated using PGLS for five groups, specifically ‘all taxa’, ‘non-avian dinosaurs’, ‘non-avian dinosaurs+stem birds’ (that is, members of the Avialae (*Archaeopteryx*, *Confuciusornis*, *Hesperornis*, *Ichthyornis*) outside of Aves), ‘Avialae’ and ‘Aves’, with correlation coefficients determined by computing the phylogenetic trait variance-covariance matrix via *phytools* [15], and the *cov2cor* function in R.

We investigated correlations of OB ratio with total OR repertoire and individual gene family sizes for Aves species using a phylogenetically corrected Pearson’s correlation coefficient, with Benjamini–Hochberg false discovery rate (FDR [16]), using the *p.adjust* function in R. Three taxa (chicken, *Gallus gallus*; zebra finch, *Taeniopygia guttata*; and budgerigar, *Melopsittacus undulatus*) show a highly expanded OR family 14 relative to other extant birds. These outliers show similar OB ratios to their respective sister taxon, but have a far greater repertoire size (with each sister taxon closer to the mean), suggesting some extreme expansion event post-divergence. This analysis was therefore conducted with and without these outlier taxa. Correlations of OB ratios with trait data were done with Phylogenetic

Generalized Least Squares (PGLS), using a composite phylogeny of all 76 species (see below: *Phylogenetic tree topology*, and Main Text Figure 1).

### *Phylogenetic tree topology*

A composite phylogeny of all 76 species was generated for all comparative analyses. An initial cladogram of extant avian taxa was generated based on the topology of Prum *et al.* [17], with *Lithornis* added as basal to extant birds, and Avialae basal to Aves. The topologies of dinosaur taxa within families/superfamilies were based on various studies (Abelisauridae [18], Allosauroidea [19], Ankylosauridae [20], Dromaeosauridae [21], Ornithomimosauria [22], Tyrannosauroidea [23]), with Ornithischia as sister group to Saurischia, Dinosauria basal to Aves. The location of Therizinosauria was based on Zanno [24], with the Saurichian topology from Cau *et al.* [21], Zanno [24] and Chinzorig *et al.* [22] used. *A. mississippiensis* was added as outgroup to all other taxa. The final phylogeny was then created based on the method devised by Grafen [25], where internal nodes are assigned a ‘height’ based on the number of branching events, with branch lengths scaled based on nodal differences. Grafen transformation was carried out in R using *ape* [13].

### *Ancestral state reconstruction of OR repertoire and OB ratio*

We estimated ancestral OB ratios at internal nodes using both the all-taxon phylogeny (i.e., including fossil taxa) and a tree limited to extant birds. We performed the analyses both with and without the three outlier taxa discussed above, to determine if their inclusion biased the ancestral reconstructions. Additional sauropsid taxa were excluded due to a lack of reported OB ratios. *Alligator mississippiensis* was used as the outgroup for all analyses. A number of methods for reconstructing the ancestral states of internal nodes across the phylogeny were employed. Ancestral state reconstruction was carried out using the ‘*ape*’ package in R, focusing on: 1) Maximum Likelihood (ML), reconstructing ancestral states by maximizing the likelihood under a BM model; 2) Phylogenetic Independent Contrasts (PIC), reconstructing ancestral states recursively with branch-dependent weighting [26] and 3) Generalized Least Squares (GLS), reconstructing ancestral states as a linear combination of extant leaves, based on the variance-covariance matrix and a BM model of evolution. These ancestral OB ratio estimates were compared across methods using a Kruskal-Wallis test.

### *Modeling OR gene repertoire as a function of OB ratio*

PGLS was used to model OR gene repertoire size (functional + non-functional) as a function of OB ratio using data from extant birds ( $n = 42$ ), extant birds with the three outlier species above excluded ( $n = 39$ ) and both with and without *A. mississippiensis* ( $n = 43$ ;  $n = 40$ , respectively). These models were used to predict OR gene numbers across all extinct taxa. Given the paucity of literature on whether or not an OB-ratio/OR repertoire size correlation exists in the crocodylian or testudine lineages, and the general lack of OB ratios for taxa for which genome sequences are available, we only included the American alligator as an outgroup. For the PGLS modeling, we make the assumption that theropod dinosaurs reflect scaling patterns more similar to the avian lineage rather than crocodylian/testudine lineages.

## References

1. Altschul SF, Gish W, Miller W, Myers EW, Lipman DJ. 1990 Basic local alignment search tool. *J Mol Biol.* **215** (3): 403–410.
2. Hayden S, Bekaert M, Crider TA, Mariani S, Murphy WJ, Teeling EC. 2010 Ecological adaptation determined functional mammalian olfactory subgenomes. *Genome Res.* **20** (1): 1–9.
3. Dehara Y, Hashiguchi Y, Matsubara K, Yanai T, Kubo M, Kumazawa Y. 2012 Characterization of squamate olfactory receptor genes and their transcripts by the high-throughput sequencing approach. *Genome Biol Evol.* **4** (4): 602 – 616.
4. St. John JA, Braun EL, Isberg SR, Miles LG, Chong AY, Gongora J, Dalzell P, Moran C, Bed'hom B, Abzhanov A, *et al.* 2012 Sequencing three crocodylian genomes to illuminate the evolution of archosaurs and amniotes. *Genome Biol* **13** (1): 415.
5. Shaffer HB, Minx P, Warren DE, Shedlock AM, Thomas RC, Valenzuela N, Abramyan J, Amemiya CT, Badenhorst D, Biggar KY, *et al.* 2013 The western painted turtle genome, a model for the evolution of extreme physiological adaptations in a slowly evolving lineage. *Gen Biol.* **14**: R28.
6. Wan Q, Pan SK, Hu L, Zhu Y, Xu PW, Xia JQ, Chen H, He GY, He J, Ni XW, *et al.* 2013 Genome analysis and signature discovery for diving and sensory properties of the endangered Chinese alligator. *Cell Res.* **23** (9): 1091–1105.
7. Green RE, Braun EL, Armstrong J, Earl D, Nguyen N, Hickey G, Vandeweghe MW, St. John JA, Capella-Gutiérrez S, Castoe TA, *et al.* 2014 Three crocodylian genomes reveal ancestral patterns of evolution among archosaurs. *Science* **346** (6215): 1254449.
8. Fu L, Niu B, Zhu Z, Wu S, Li W. 2012 CD-HIT: accelerated for clustering the next generation sequencing data. *Bioinformatics* **28** (23): 3150–3152.
9. Zheng Y, Wiens JJ. 2016 Combining phylogenomic and supermatrix approaches, and a time-calibrated phylogeny for squamate reptiles (lizards and snakes) based on 52 genes and 4162 species. *Mol Phylogenetics Evol.* **94**: 537–547.
10. Modena D, Trentini M, Corsini M, Bombaci A, Giorgetti A. 2011 OlfactionDB A database of olfactory receptors and their ligands. *Adv Lif Sci.* **1** (1): 1–5.
11. Dunkel A, Steinhaus M, Kotthoff M, Nowak B, Krautwurst D, Schieberle P, Hofmann T. 2014 Nature's chemical signatures in human olfaction: a foodborne perspective for future biotechnology. *Angew Chem.* **53** (28): 7124–7143.
12. Moran JK, Dietrich DR, Elbert T, Pause BM, Kubler L, Weierstall R. 2015 The scent of Blood: A driver of Human Behavior? *PLoS ONE* **10** (9): e0137777.
13. Paradis E, Claude J, Strimmer K. 2004 APE: analysis of phylogenetics and evolution in R language. *Bioinformatics* **20** (2): 289–290.
14. Pinheiro J, Bates D, DebRoy S, Sarkar D, R Core Team. 2015 nlme: Linear and nonlinear mixed effects models. *R package version 3.1-128*. Available from: <https://cran.r-project.org/web/packages/nlme/nlme.pdf>.
15. Revell. 2012 An R package for phylogenetic comparative biology (and other things). *Methods Ecol Evol.* **3**: 217–223.

16. Benjamini Y, Hochberg, Y. 1995 Controlling the false discovery rate: a practical and powerful approach to multiple testing. *J R Stat Soc Series B* **57**: 289–300.
17. Prum RO, Berv JS, Dornburg A, Field DJ, Townsend JP, Lemmon EM, Lemmon AR. 2015 A comprehensive phylogeny of birds (Aves) using targeted next-generation DNA sequencing. *Nature* **526**: 569–573.
18. Filippi LS, Méndez AH, Valieri RDJ, Garrido AC. 2016 A new brachyrostran with hypertrophied axial structures reveals an unexpected radiation of latest Cretaceous abelisaurids. *Cretac Res.* **61**: 209–219.
19. Brusatte SL, Sereno PC. 2008 Phylogeny of Allosauroidea (Dinosauria: Theropoda): Comparative analysis and resolution. *J Syst Paleontol.* **6** (2): 155–182.
20. Thompson RS, Parish JC, Maidment SCR, Barrett PM. 2011 Phylogeny of the ankylosaurian dinosaurs (Ornithischia: Thyreophora). *J Syst Palaeontol.* **10** (2): 301–312.
21. Cau A, Beyrand V, Voeten D, Fernandez V, Tafforeau P, Stein K, Barsbold R, Tsogtbaatar K, Currie P, Godrfroit P. 2017 Synchrotron scanning reveals amphibious ecomorphology in a new clade of bird-like dinosaurs. *Nature* **552** (7685): 395–399.
22. Chinzorig T, Kobayashi T, Tsogtbaatar K, Currie PJ, Watabe M, Barsbold R. 2017 First Ornithomimid (Theropoda, Ornithomimosauria) from the Upper Cretaceous Djadokhta Formation of Tögrögiin Shiree, Mongolia. *Sci Rep.* **7** (5832).
23. Brusatte SL, Carr TD. 2016 The phylogeny and evolutionary history of tyrannosauroid dinosaurs. *Sci Rep.* **6** (20252).
24. Zanno LE. 2010 A taxonomic and phylogenetic re-evaluation of Therizinosauria (Dinosauria: Maniraptora). *J Syst Palaeontol.* **8** (4): 503–543.
25. Grafen A. 1989 The phylogenetic regression. *Philos Trans R Soc B.* **326** (1233): 119–157.
26. Royer-Carenzi M, Didier G. 2016 A comparison of ancestral state reconstruction methods for quantitative characters. *J Theor Biol* **7** (404): 126–142.

**Supplementary Table S1.** The list of extinct and extant taxa included in this study. OR repertoire sizes OB ratio, Diet and Body mass are displayed. Where multiple OB ratios are available, the mean ratio was used (denoted by \*). PGLS corrected repertoire sizes are inferred for extinct taxa. † indicates extinct taxon.

| Species                           | Common name                | OR Repertoire | OB ratio (%) | Inferred OR Repertoire | Diet        | Body mass (kg) |
|-----------------------------------|----------------------------|---------------|--------------|------------------------|-------------|----------------|
| <i>Alligator mississippiensis</i> | Alligator                  | 1077          | 49.8         | -                      | Carnivore   | 150            |
|                                   |                            |               | 54.3         | -                      |             |                |
|                                   |                            |               | 55.1         | -                      |             |                |
|                                   |                            |               | 53*          | -                      |             |                |
| <i>Tinamus guttatus</i>           | White-throated tinamou     | 388           | 19.5         | -                      | Omnivore    | 0.8            |
| <i>Struthio camelus</i>           | Ostrich                    | 318           | 19.2         | -                      | Omnivore    | 111            |
| <i>Taeniopygia guttata</i>        | Zebra finch                | 688           | 9.7          | -                      | Herbivore   | 0.0122         |
| <i>Geospiza fortis</i>            | Medium ground finch        | 182           | 9.7          | -                      | Herbivore   | 0.0183         |
| <i>Corvus brachyrhynchos</i>      | American crow              | 229           | 5            | -                      | Omnivore    | 0.506          |
| <i>Manacus vitellinus</i>         | Golden-collared manakin    | 227           | 9.7          | -                      | Frugivore   | 0.0193         |
| <i>Acanthisitta chloris</i>       | Rifleman                   | 222           | 9.7          | -                      | Insectivore | 0.007          |
| <i>Melopsittacus undulatus</i>    | Budgerigar                 | 484           | 6.2          | -                      | Herbivore   | 0.029          |
| <i>Nestor notabilis</i>           | Kea                        | 239           | 8            | -                      | Omnivore    | 0.956          |
| <i>Falco peregrinus</i>           | Peregrine falcon           | 460           | 20           | -                      | Carnivore   | 0.815          |
| <i>Cariama cristata</i>           | Red-legged seriema         | 293           | 22.2         | -                      | Carnivore   | 1.4            |
| <i>Picoides pubescens</i>         | Downy woodpecker           | 252           | 10           | -                      | Omnivore    | 0.028          |
| <i>Merops nubicus</i>             | Northern carmine bee-eater | 252           | 14.5         | -                      | Insectivore | 0.051          |
| <i>Colius striatus</i>            | Speckled mousebird         | 292           | 9.7          | -                      | Frugivore   | 0.055          |
| <i>Tyto alba</i>                  | Barn owl                   | 321           | 18.5         | -                      | Carnivore   | 0.392          |
| <i>Haliaeetus leucocephalus</i>   | Bald eagle                 | 262           | 18           | -                      | Piscivore   | 5.35           |
| <i>Haliaeetus albicilla</i>       | White-tailed eagle         | 283           | 18           | -                      | Carnivore   | 5.572          |
| <i>Cathartes aura</i>             | Turkey vulture             | 400           | 28.7         | -                      | Carnivore   | 2.006          |
| <i>Pelecanus crispus</i>          | Dalmatian pelican          | 330           | 9.7          | -                      | Piscivore   | 10             |
| <i>Egretta garzetta</i>           | Little egret               | 491           | 21.7         | -                      | Omnivore    | 0.55           |
| <i>Nipponia nippon</i>            | Crested ibis               | 371           | 21.7         | -                      | Carnivore   | 1.9            |
| <i>Phalacrocorax carbo</i>        | Great cormorant            | 270           | 14.5         | -                      | Piscivore   | 2.4            |
| <i>Pygoscelis adeliae</i>         | Adélie penguin             | 320           | 17           | -                      | Carnivore   | 4.85           |
| <i>Aptenodytes forsteri</i>       | Emperor penguin            | 355           | 17           | -                      | Carnivore   | 38.2           |
| <i>Fulmarus glacialis</i>         | Northern fulmar            | 370           | 27.1         | -                      | Carnivore   | 0.613          |
| <i>Gavia stellata</i>             | Red-throated loon          | 369           | 20           | -                      | Piscivore   | 1.729          |
| <i>Phaethon lepturus</i>          | White-tailed tropicbird    | 306           | 20           | -                      | Carnivore   | 0.33           |
| <i>Balearica regulorum</i>        | Grey crowned crane         | 369           | 22.2         | -                      | Omnivore    | 3.777          |
| <i>Charadrius vociferus</i>       | Killdeer                   | 393           | 16.1         | -                      | Omnivore    | 0.101          |
| <i>Ophisthocomus hoazin</i>       | Hoatzin                    | 467           | 24.2         | -                      | Herbivore   | 0.696          |
| <i>Calypte anna</i>               | Anna's hummingbird         | 324           | 14           | -                      | Nectivore   | 0.0045         |

|                                        |                            |     |       |     |             |         |
|----------------------------------------|----------------------------|-----|-------|-----|-------------|---------|
| <i>Chaetura pelagica</i>               | Chimney swift              | 355 | 18.8  | -   | Carnivore   | 0.024   |
| <i>Antrostomus carolinensis</i>        | Chuck-will's-widow         | 353 | 23.8  | -   | Insectivore | 0.188   |
| <i>Cuculus canorus</i>                 | Common cuckoo              | 266 | 19.5  | -   | Insectivore | 0.117   |
| <i>Mesitornis unicolor</i>             | Brown mesite               | 343 | 22.2  | -   | Omnivore    | 0.148   |
| <i>Pterocles gutturalis</i>            | Yellow-throated sandgrouse | 280 | 20.7  | -   | Herbivore   | 0.342   |
| <i>Columba livia</i>                   | Rock dove                  | 437 | 21.2  | -   | Herbivore   | 0.355   |
| <i>Phoenicopterus ruber</i>            | American flamingo          | 363 | 21.7  | -   | Carnivore   | 3.579   |
| <i>Podiceps cristatus</i>              | Great crested grebe        | 319 | 24.5  | -   | Carnivore   | 0.92    |
| <i>Meleagris gallopavo</i>             | Wild turkey                | 313 | 13.5  | -   | Omnivore    | 6.05    |
| <i>Gallus gallus</i>                   | Chicken                    | 674 | 15.4  | -   | Omnivore    | 0.904   |
| <i>Anas platyrhynchos</i>              | Mallard duck               | 344 | 19    | -   | Omnivore    | 1.082   |
| † <i>Allosaurus fragilis</i>           |                            | -   | 51.6  | 540 | Carnivore   | 2545.13 |
|                                        |                            |     | 50    | 531 |             |         |
|                                        |                            |     | 50.8* | 536 |             |         |
| † <i>Acrocanthosaurus atokensis</i>    |                            | -   | 58.1  | 575 | Carnivore   | 3777.58 |
| † <i>Carcharodontosaurus saharicus</i> |                            | -   | 56    | 564 | Carnivore   | 7905.47 |
| † <i>Giganotosaurus carolinii</i>      |                            | -   | 57.7  | 573 | Carnivore   | 7559.49 |
| † <i>Ceratosaurus magnicornis</i>      |                            | -   | 48.1  | 521 | Carnivore   | 538.86  |
| † <i>Majungasaurus crenatissimus</i>   |                            | -   | 48.3  | 522 | Carnivore   | 1130    |
| † <i>Dilong paradoxus</i>              |                            | -   | 27    | 407 | Carnivore   | 9.69    |
| † <i>Albertosaurus sarcophagus</i>     |                            | -   | 71    | 645 | Carnivore   | 2545.13 |
| † <i>Gorgosaurus libratus</i>          |                            | -   | 68.5  | 631 | Carnivore   | 2709.45 |
| † <i>Tarbosaurus bataar</i>            |                            | -   | 65.1  | 613 | Carnivore   | 2164.6  |
| † <i>Tyrannosaurus rex</i>             |                            | -   | 66.5  | 621 | Carnivore   | 5855.3  |
|                                        |                            |     | 71    | 645 |             |         |
|                                        |                            |     | 68.3  | 630 |             |         |
|                                        |                            |     | 68.7* | 632 |             |         |
| † <i>Garudimimus brevipes</i>          |                            | -   | 28.8  | 417 | Omnivore    | 97.84   |
| † <i>Ornithomimus edmontonensis</i>    |                            | -   | 31.4  | 431 | Omnivore    | 152.74  |
| † <i>Dromiceiomimus brevitertius</i>   |                            | -   | 29.4  | 420 | Omnivore    | 206.79  |
| † <i>Struthiomimus altus</i>           |                            | -   | 32.5  | 437 | Omnivore    | 277.97  |
| † <i>Citipati osmolskae</i>            |                            | -   | 31.5  | 431 | Omnivore    | 129.78  |
| † <i>Saurornitholestes langstoni</i>   |                            | -   | 34.8  | 449 | Carnivore   | 16.62   |
| † <i>Bambiraptor feinbergi</i>         |                            | -   | 28.5  | 415 | Carnivore   | 2.44    |
| † <i>Velociraptor mongoliensis</i>     |                            | -   | 35.7  | 454 | Carnivore   | 13.36   |
| † <i>Troodon formosus</i>              |                            | -   | 33.2  | 440 | Carnivore   | 60.76   |
|                                        |                            |     | 33.5  | 442 |             |         |
|                                        |                            |     | 32.6  | 437 |             |         |

|                                      |  |   |       |     |           |         |
|--------------------------------------|--|---|-------|-----|-----------|---------|
|                                      |  |   | 33    | 439 |           |         |
|                                      |  |   | 33.1* | 440 |           |         |
| † <i>Archaeopteryx lithographica</i> |  | - | 17.1  | 353 | Carnivore | 0.28    |
| † <i>Confuciusornis sanctus</i>      |  | - | 17.9  | 358 | Piscivore | 0.277   |
| † <i>Hesperornis regalis</i>         |  | - | 15.3  | 344 | Piscivore | 10.608  |
|                                      |  |   | 21.3  | 376 |           |         |
|                                      |  |   | 18.3* | 360 |           |         |
| † <i>Ichthyornis dispar</i>          |  | - | 18.1  | 359 | Piscivore | 0.35    |
| † <i>Lithornis plebius</i>           |  | - | 36.5  | 458 | -         | 0.48    |
| † <i>Lithornis promiscuus</i>        |  | - | 37.7  | 465 | -         | 0.908   |
| † <i>Deinonychus antirrhopus</i>     |  | - | 41    | 483 | Carnivore | 56.7    |
| † <i>Tsaagan mangas</i>              |  | - | 36    | 456 | Carnivore | 13.36   |
| † <i>Viavenator exxoni</i>           |  | - | 57    | 569 | Carnivore | -       |
| † <i>Erlikosaurus andrewsi</i>       |  | - | 40    | 477 | Herbivore | 173.7   |
| † <i>Euoplocephalus sp</i>           |  | - | 52    | 542 | Herbivore | 2675.90 |
| † <i>Pawpawsaurus campbelli</i>      |  | - | 46.2  | 511 | Herbivore | -       |
| † <i>Panoplosaurus mirus</i>         |  | - | 44    | 499 | Herbivore | 1600    |



**Supplementary Table S2.** Correlations between OB ratio and OR repertoire size in birds were investigated using phylogenetically uncorrected and corrected Pearson's correlation coefficient (r). Correlations for individual OR gene families, OR gene class and total OR repertoire size are given. The p-values were adjusted for multiple comparisons using the Benjamini-Hochberg false discovery rate (FDR, [40]). Significant p-values are highlighted in bold. Correlations with and without outlier species (*Gallus gallus*, *Melopsittacus undulates* and *Taeniopygia guttata*) are displayed.

| Family           | Aves (n = 39)                  |                  |                              |                  | Aves (n = 42)                  |                  |                              |                  |
|------------------|--------------------------------|------------------|------------------------------|------------------|--------------------------------|------------------|------------------------------|------------------|
|                  | Phylogenetically uncorrected r | Adjusted p-value | Phylogenetically corrected r | Adjusted p-value | Phylogenetically uncorrected r | Adjusted p-value | Phylogenetically corrected r | Adjusted p-value |
| OR 1/3/7         | 0.2261                         | 0.1791           | -0.1555                      | 0.4019           | 0.1816                         | 0.2496           | -0.0788                      | 0.6677           |
| OR 2/13          | 0.4750                         | <b>0.0045</b>    | 0.4446                       | <b>0.0206</b>    | 0.3751                         | <b>0.0267</b>    | -0.0878                      | 0.6677           |
| OR 4             | 0.3952                         | <b>0.0179</b>    | 0.4061                       | <b>0.0206</b>    | 0.3212                         | <b>0.04845</b>   | 0.32448                      | 0.0841           |
| OR 5/8/9         | 0.5556                         | <b>0.0008</b>    | 0.1830                       | 0.3369           | 0.4410                         | <b>0.0154</b>    | 0.195§                       | 0.3775           |
| OR 6             | 0.6278                         | <b>9.193e-05</b> | 0.4172                       | <b>0.0206</b>    | 0.6321                         | <b>9.96e-05</b>  | 0.5317                       | <b>0.0041</b>    |
| OR 10            | 0.4762                         | <b>0.0045</b>    | 0.4113                       | <b>0.0206</b>    | 0.3815                         | <b>0.0251</b>    | 0.3631                       | 0.0632           |
| OR 11            | 0.5485                         | <b>0.0009</b>    | 0.5096                       | <b>0.0129</b>    | 0.4847                         | <b>0.0080</b>    | 0.4873                       | <b>0.0074</b>    |
| OR 12            | 0.2094                         | 0.2008           | 0.0180                       | 0.9133           | 0.2625                         | 0.1085           | 0.3875                       | 0.0524           |
| OR 14            | 0.3995                         | <b>0.0179</b>    | 0.2349                       | 0.2624           | 0.2280                         | 0.1578           | -0.03695                     | 0.8163           |
| OR 51            | 0.4140                         | <b>0.0154</b>    | 0.1351                       | 0.4438           | 0.3788                         | <b>0.0251</b>    | 0.1341                       | 0.5156           |
| OR 52            | 0.3267                         | 0.0494           | 0.2069                       | 0.3206           | 0.3561                         | <b>0.0289</b>    | 0.3392                       | 0.0783           |
| Alpha (Class I)  | 0.3868                         | <b>0.0191</b>    | 0.1943                       | 0.3301           | 0.3668                         | <b>0.0262</b>    | 0.1595                       | 0.4870           |
| Gamma (Class II) | 0.6267                         | <b>9.193e-05</b> | 0.4133                       | <b>0.0206</b>    | 0.4208                         | <b>0.0154</b>    | 0.2474                       | 0.2284           |
| Total OR         | 0.6516                         | <b>9.193e-05</b> | 0.4289                       | <b>0.0206</b>    | 0.4208                         | <b>0.0154</b>    | 0.1319                       | 0.5156           |

**Supplementary Table S3.** Internal ancestral node estimates of OB ratios and OR gene repertoires using three different methods are displayed. All extant taxa, including alligator, is included. Information pertaining to what each ancestral node represents is also given. Node numbers correspond to Supplementary Figure 4.

| Node description                                                     | Node | Olfactory bulb ratio |       |       | Olfactory receptor gene repertoire |     |     |
|----------------------------------------------------------------------|------|----------------------|-------|-------|------------------------------------|-----|-----|
|                                                                      |      | ML                   | PIC   | GLS   | ML                                 | PIC | GLS |
| Alligator+Aves                                                       | 1    | 32.09                | 25.49 | 25.49 | 488                                | 497 | 497 |
| Palaeognathae+ Neognathae                                            | 2    | 32.15                | 19.22 | 24.84 | 470                                | 365 | 483 |
| Galloanserae+ Strisores+Columbaves+Neoaves (Neognathae)              | 3    | 30.52                | 19.19 | 23.8  | 349                                | 353 | 355 |
| Columbaves+Neoaves                                                   | 5    | 28.03                | 20.2  | 22.13 | 436                                | 368 | 462 |
| Aequorlitorntithes+Afroaves+Opisthocomus+Balearia (Neoaves)          | 6    | 24.59                | 20.04 | 21.4  | 418                                | 429 | 430 |
| Aequorlitorntithes+ Afroaves + Opisthocomus                          | 7    | 23.65                | 19.29 | 21.19 | 471                                | 494 | 472 |
| Aequornithes+Phaethon+Mirandornithes+Charadrius (Aequorlitorntithes) | 8    | 19.59                | 19.69 | 19.94 | 393                                | 349 | 433 |
| Aequornithes+Phaethon                                                | 9    | 17.74                | 19.46 | 19.67 | 349                                | 345 | 347 |
| Pelecaniformes+Phalacrocorax+Austrodyptornithes+Gavia (Aequornithes) | 10   | 18.24                | 19.25 | 19.54 | 342                                | 340 | 342 |
| Pelecaniformes+Phalacrocorax+Austrodyptornithes                      | 11   | 18.75                | 18.9  | 19.34 | 364                                | 350 | 411 |
| Pelecaniformes+Phalacrocorax                                         | 12   | 17.43                | 16.83 | 17.52 | 325                                | 327 | 330 |
| Pelecanus+Nipponia+Egretta (Pelecaniformes)                          | 13   | 17.94                | 18.27 | 17.93 | 342                                | 365 | 349 |
| Pelecanus+Nipponia                                                   | 14   | 17.89                | 15.7  | 16.44 | 325                                | 312 | 324 |
| Spheniscidae +Fulmarus (Austrodyptornithes)                          | 15   | 21.64                | 21.33 | 20.98 | 365                                | 359 | 393 |
| Aptenodytes+Pygocelis (Spheniscidae)                                 | 16   | 18.4                 | 17    | 18.33 | 365                                | 355 | 389 |
| Mirandornithes+Charadrius                                            | 17   | 20.6                 | 20.1  | 20.09 | 366                                | 359 | 367 |
| Podiceps+Phoenicopterus (Mirandornithes)                             | 18   | 22.08                | 23.1  | 22.1  | 353                                | 321 | 359 |
| Afroaves+Opisthocomus                                                | 19   | 16.93                | 18.98 | 19.54 | 334                                | 327 | 329 |
| Inopinaves+Coraciimorphae+Tyto+Acciptrimorphae (Afroaves)            | 20   | 17.93                | 17.15 | 19.12 | 291                                | 273 | 291 |
| Inopinaves+Coraciimorphae+Tyto                                       | 21   | 22.2                 | 14.45 | 17.08 | 311                                | 319 | 341 |
| Psittacopasserae+Falco+Cariama (Inopinaves)                          | 22   | 18.63                | 14.76 | 15.6  | 288                                | 289 | 295 |
| Psittacopasserae+Falco                                               | 23   | 16.98                | 11.83 | 14.4  | 274                                | 269 | 281 |
| Psittaciformes+Passeriformes (Psittacopasserae)                      | 24   | 15.61                | 8.21  | 12.4  | 266                                | 252 | 262 |
| Passeroidea+Corvus+Manacus+Acanthisitta (Passeriformes)              | 25   | 10.37                | 8.89  | 10.33 | 281                                | 337 | 338 |
| Passeroidea+Corvus+Manacus                                           | 26   | 9.19                 | 8.46  | 9.46  | 302                                | 354 | 343 |
| Passeroidea+Corvus                                                   | 27   | 8.32                 | 7.69  | 8.5   | 295                                | 307 | 332 |
| Geospiza+Taeniopygia (Passeroidea)                                   | 28   | 9.13                 | 9.7   | 9.3   | 358                                | 362 | 359 |

|                                                   |    |       |       |       |     |     |     |
|---------------------------------------------------|----|-------|-------|-------|-----|-----|-----|
| Melopsittacus+Nestor (Psittaciformes)             | 29 | 6.89  | 7.1   | 7.58  | 252 | 273 | 297 |
| Coraciimorphae+Tyto                               | 30 | 15.84 | 13.96 | 14.32 | 286 | 301 | 299 |
| Picoides+Merops+Colius (Coraciimorphae)           | 31 | 15.37 | 11.16 | 12.62 | 319 | 347 | 325 |
| Picoides+Merops                                   | 32 | 13.7  | 12.25 | 12.37 | 400 | 435 | 398 |
| Haliaeetus+Cathartes (Acciptrimorphae)            | 33 | 21.65 | 22.59 | 22.37 | 337 | 351 | 357 |
| Haliaeetus                                        | 34 | 19.19 | 18    | 19.46 | 361 | 363 | 363 |
| Strisores+Columbaves+Neoaves                      | 35 | 29.36 | 20.04 | 22.82 | 347 | 341 | 348 |
| Mesitornis+Pterocles+Columba+Cuculus (Columbaves) | 35 | 22.39 | 20.64 | 20.69 | 332 | 344 | 350 |
| Mesitornis+Pterocles+Columba                      | 36 | 21.35 | 21.34 | 21.04 | 338 | 359 | 353 |
| Mesitornis+Pterocles                              | 37 | 21.97 | 21.45 | 21.31 | 341 | 354 | 353 |
| Apodiformes+Antrostomus (Strisores)               | 38 | 19.31 | 19.57 | 19.65 | 348 | 351 | 352 |
| Chaetura+Calypte (Apodiformes)                    | 39 | 17.46 | 16.4  | 17.48 | 340 | 338 | 342 |
| Galliformes+Anas (Galloanserae)                   | 40 | 17.64 | 16.4  | 16.57 | 352 | 357 | 356 |
| Gallus+Meleagris (Galliformes)                    | 41 | 15.96 | 14.45 | 15.16 | 379 | 411 | 385 |
| Tinamus+Struthio (Palaeognathae)                  | 42 | 20.22 | 19.35 | 19.42 | 361 | 351 | 362 |

**Supplementary Table S4.** Internal ancestral node estimates of OB ratios and OR gene repertoires for extant taxa, with anomalous species (*Gallus gallus*, *Taeniopygia guttata*, *Melopsittacus undulatus*) removed. Information pertaining to what each ancestral node represents is also given. Node numbers correspond to Supplementary Figure 5.

| Node description                                                     | Node | Olfactory bulb ratio |       |       | Olfactory receptor gene repertoire |     |     |
|----------------------------------------------------------------------|------|----------------------|-------|-------|------------------------------------|-----|-----|
|                                                                      |      | ML                   | PIC   | GLS   | ML                                 | PIC | GLS |
| Gallus+Meleagris (Galliformes)                                       | 1    | 27.12                | 25.48 | 25.48 | 413                                | 480 | 480 |
| Melopsittacus+Nestor (Psittaciformes)                                | 2    | 25.66                | 19.21 | 24.82 | 399                                | 344 | 466 |
| Geospiza+Taeniopygia (Passeroidea)                                   | 3    | 25.30                | 19.17 | 23.78 | 379                                | 342 | 443 |
| Alligator+Aves                                                       | 4    | 24.02                | 20.06 | 22.82 | 362                                | 346 | 418 |
| Palaeognathae+ Neognathae                                            | 5    | 22.74                | 20.22 | 22.13 | 352                                | 347 | 399 |
| Galloanserae+ Strisores+Columbaves+Neoaves (Neognathae)              | 6    | 20.97                | 20.07 | 21.41 | 351                                | 354 | 383 |
| Strisores+Columbaves+Neoaves                                         | 7    | 21.01                | 19.33 | 21.20 | 351                                | 349 | 380 |
| Columbaves+Neoaves                                                   | 8    | 18.70                | 19.69 | 19.94 | 351                                | 351 | 356 |
| Aequorlornithes+Afroaves+Opisthocomus+Balearica (Neoaves)            | 9    | 18.36                | 19.46 | 19.67 | 346                                | 344 | 349 |
| Aequorlornithes+ Afroaves + Opisthocomus                             | 10   | 17.72                | 19.25 | 19.54 | 351                                | 359 | 352 |
| Aequornithes+Phaethon+Mirandornithes+Charadrius (Aequorlornithes)    | 11   | 17.59                | 18.90 | 19.34 | 352                                | 354 | 353 |
| Aequornithes+Phaethon                                                | 12   | 18.26                | 16.83 | 17.52 | 356                                | 357 | 356 |
| Pelecaniformes+Phalacrocorax+Austrodyptornithes+Gavia (Aequornithes) | 13   | 16.76                | 18.27 | 17.93 | 385                                | 411 | 385 |
| Pelecaniformes+Phalacrocorax+Austrodyptornithes                      | 14   | 15.34                | 15.70 | 16.44 | 364                                | 351 | 362 |
| Pelecaniformes+Phalacrocorax                                         | 15   | 20.40                | 21.33 | 20.98 | 352                                | 351 | 352 |
| Pelecanus+Nipponia+Egretta (Pelecaniformes)                          | 16   | 18.42                | 17.00 | 18.33 | 342                                | 338 | 342 |
| Pelecanus+Nipponia                                                   | 17   | 20.15                | 20.10 | 20.09 | 363                                | 363 | 363 |
| Spheniscidae +Fulmarus (Austrodyptornithes)                          | 18   | 22.46                | 23.10 | 22.10 | 349                                | 341 | 348 |
| Aptenodytes+Pygocelis (Spheniscidae)                                 | 19   | 23.54                | 19.04 | 19.60 | 356                                | 347 | 355 |
| Mirandornithes+Charadrius                                            | 20   | 24.71                | 17.24 | 19.18 | 348                                | 305 | 346 |
| Podiceps+Phoenicopterus (Mirandornithes)                             | 21   | 23.79                | 14.59 | 17.17 | 321                                | 294 | 323 |
| Afroaves+Opisthocomus                                                | 22   | 20.10                | 14.97 | 15.77 | 299                                | 297 | 306 |
| Inopinaves+Coraciimorphae+Tyto+Acciptrimorphae (Afroaves)            | 23   | 16.88                | 12.09 | 14.62 | 295                                | 298 | 304 |
| Inopinaves+Coraciimorphae+Tyto                                       | 24   | 13.62                | 8.50  | 12.69 | 275                                | 225 | 279 |
| Psittacopasserae+Falco+Cariama (Inopinaves)                          | 25   | 10.94                | 8.79  | 10.41 | 238                                | 217 | 243 |
| Psittacopasserae+Falco                                               | 26   | 8.88                 | 8.29  | 9.45  | 228                                | 214 | 230 |
| Psittaciformes (Nestor)+Passeriformes (Psittacopasserae)             | 27   | 8.28                 | 7.35  | 8.40  | 219                                | 206 | 218 |

|                                                         |    |       |       |       |     |     |     |
|---------------------------------------------------------|----|-------|-------|-------|-----|-----|-----|
| Passeroidea+Corvus+Manacus+Acanthisitta (Passeriformes) | 28 | 16.82 | 13.96 | 14.33 | 295 | 289 | 293 |
| Passeroidea+Corvus+Manacus                              | 29 | 14.77 | 11.16 | 12.62 | 281 | 269 | 280 |
| Passeroidea (Geospiza)+Corvus                           | 30 | 13.21 | 12.25 | 12.37 | 261 | 252 | 261 |
| Coraciimorphae+Tyto                                     | 31 | 23.34 | 22.59 | 22.37 | 326 | 327 | 328 |
| Picoides+Merops+Colius (Coraciimorphae)                 | 32 | 19.74 | 18.00 | 19.46 | 289 | 273 | 291 |
| Picoides+Merops                                         | 33 | 21.46 | 20.64 | 20.69 | 328 | 327 | 330 |
| Haliaeetus+Cathartes (Acciptrimorphae)                  | 34 | 20.79 | 21.34 | 21.04 | 349 | 365 | 349 |
| Haliaeetus                                              | 35 | 20.93 | 21.45 | 21.31 | 323 | 312 | 324 |
| Mesitornis+Pterocles+Columba+Cuculus (Columbaves)       | 36 | 19.86 | 19.57 | 19.65 | 346 | 345 | 347 |
| Mesitornis+Pterocles+Columba                            | 37 | 17.37 | 16.40 | 17.48 | 342 | 340 | 342 |
| Mesitornis+Pterocles                                    | 38 | 15.94 | 16.25 | 16.45 | 329 | 329 | 332 |
| Apodiformes+Antrostomus (Strisores)                     | 39 | 19.55 | 19.35 | 19.42 | 353 | 353 | 354 |

**Supplementary Table S5.** Internal ancestral node repertoire estimates for both extant and extinct taxa using three different methods. Node labels corresponding to the phylogenies displayed in Supplementary Figures S6–8 are also given.

| <b>Node label</b> | <b>ML</b> | <b>PIC</b> | <b>GLS</b> |
|-------------------|-----------|------------|------------|
| 1                 | 31.82     | 43.21      | 43.21      |
| 2                 | 31.83     | 41.36      | 43.08      |
| 3                 | 31.98     | 39.88      | 42.48      |
| 4                 | 32.05     | 37.38      | 41.53      |
| 5                 | 31.68     | 33.05      | 39.46      |
| 6                 | 30.53     | 27.91      | 35.73      |
| 7                 | 29.33     | 27.36      | 33.12      |
| 8                 | 29.06     | 24.94      | 32.35      |
| 9                 | 28.8      | 23.53      | 31.59      |
| 10                | 26.81     | 20.57      | 26.67      |
| 11                | 26.66     | 21.23      | 26.06      |
| 12                | 26.62     | 21.91      | 25.62      |
| 13                | 26.74     | 22.78      | 25.08      |
| 14                | 26.3      | 19.22      | 23.97      |
| 15                | 25.88     | 19.19      | 23.09      |
| 16                | 25.75     | 20.04      | 22.3       |
| 17                | 25.73     | 20.2       | 21.75      |
| 18                | 25.53     | 20.04      | 21.15      |
| 19                | 25.27     | 19.29      | 20.96      |
| 20                | 19.61     | 19.69      | 19.9       |
| 21                | 19.31     | 19.46      | 19.65      |
| 22                | 19.01     | 19.25      | 19.53      |
| 23                | 18.75     | 18.9       | 19.33      |
| 24                | 17.34     | 16.83      | 17.52      |
| 25                | 17.95     | 18.27      | 17.93      |
| 26                | 16.5      | 15.7       | 16.44      |
| 27                | 20.99     | 21.33      | 20.98      |
| 28                | 18.39     | 17         | 18.33      |
| 29                | 20.04     | 20.1       | 20.08      |
| 30                | 22.08     | 23.1       | 22.09      |
| 31                | 22.27     | 18.98      | 19.49      |
| 32                | 21.46     | 17.15      | 19.07      |
| 33                | 17.76     | 14.45      | 17.05      |
| 34                | 14.5      | 14.76      | 15.59      |
| 35                | 13.03     | 11.83      | 14.39      |
| 36                | 11.19     | 8.21       | 12.4       |
| 37                | 9.71      | 8.89       | 10.33      |
| 38                | 9.19      | 8.46       | 9.46       |
| 39                | 8.72      | 7.69       | 8.5        |
| 40                | 9.56      | 9.7        | 9.3        |
| 41                | 7.42      | 7.1        | 7.58       |
| 42                | 14.71     | 13.96      | 14.31      |
| 43                | 12.89     | 11.16      | 12.61      |
| 44                | 12.5      | 12.25      | 12.37      |
| 45                | 22.52     | 22.59      | 22.37      |
| 46                | 19.5      | 18         | 19.46      |
| 47                | 21.05     | 20.64      | 20.68      |
| 48                | 21.25     | 21.34      | 21.04      |
| 49                | 21.4      | 21.45      | 21.31      |
| 50                | 19.66     | 19.57      | 19.64      |
| 51                | 17.46     | 16.4       | 17.48      |
| 52                | 16.53     | 16.4       | 16.55      |

|    |       |       |       |
|----|-------|-------|-------|
| 53 | 15.11 | 14.45 | 15.15 |
| 54 | 19.44 | 19.35 | 19.41 |
| 55 | 36.97 | 37.1  | 36.96 |
| 56 | 18.3  | 18.2  | 18.28 |
| 57 | 34.81 | 34.47 | 34.37 |
| 58 | 35.09 | 35.18 | 34.69 |
| 59 | 36.92 | 38.06 | 37.05 |
| 60 | 36.06 | 35.85 | 36.25 |
| 61 | 32.07 | 31.65 | 32.08 |
| 62 | 30.26 | 30.34 | 30.45 |
| 63 | 30.8  | 31.3  | 30.91 |
| 64 | 30.53 | 30.4  | 30.57 |
| 65 | 52.9  | 53.45 | 53.12 |
| 66 | 59.83 | 68.33 | 59.88 |
| 67 | 67.8  | 69.75 | 67.78 |
| 68 | 65.58 | 66.9  | 65.5  |
| 69 | 53.61 | 54.87 | 54.64 |
| 70 | 55.48 | 57.39 | 56.12 |
| 71 | 56.32 | 56.85 | 56.61 |
| 72 | 50.65 | 50.7  | 50.6  |
| 73 | 52.04 | 52.65 | 51.97 |
| 74 | 48.02 | 48.06 | 48    |
| 75 | 46.12 | 45.1  | 46.07 |

**Supplementary Table S6.** Inferred repertoire sizes for extinct taxa using various PGLS models and using non-phylogenetically corrected linear regression. Mean OB ratios are indicated with ‘\*’. Models with and without the alligator are displayed.

| Species                              | OB ratio | PGLS alligator+Aves,<br>rep= 6.87*OB+305.20 | PGLS Aves<br>rep= 5.63*OB+236.38 | PGLS alligator+Aves<br>rep= 6.61*OB+328.33 | Linear Regression |           |           |
|--------------------------------------|----------|---------------------------------------------|----------------------------------|--------------------------------------------|-------------------|-----------|-----------|
|                                      |          | Outlier taxa removed                        |                                  | Outlier taxa included                      | Fit               | Lower     | Upper     |
| <i>Allosaurus fragilis</i>           | 51.6     | 660.0319                                    | 526.7173                         | 669.5696615                                | 753.7345          | 455.48464 | 1051.9843 |
| <i>Allosaurus fragilis</i>           | 50       | 649.0294                                    | 517.7147                         | 658.9884881                                | 735.1643          | 441.04301 | 1029.2856 |
| <i>Allosaurus fragilis</i> *         | 50.8     | 654.5306                                    | 522.2160                         | 664.2790748                                | 744.4494          | 448.2818  | 1040.617  |
| <i>Acrocanthosaurus atokensis</i>    | 58.1     | 704.7297                                    | 563.2902                         | 712.5556786                                | 829.1758          | 512.765   | 1145.5866 |
| <i>Carcharodontosaurus saharicus</i> | 56       | 690.2889                                    | 551.4743                         | 698.6678884                                | 804.8025          | 494.4898  | 1115.1151 |
| <i>Giganotosaurus carolinii</i>      | 57.7     | 701.9791                                    | 561.0396                         | 709.9103852                                | 824.5333          | 509.3     | 1139.7665 |
| <i>Ceratosaurus magnicornis</i>      | 48.1     | 635.9638                                    | 507.0242                         | 646.4233446                                | 713.1122          | 423.7022  | 1002.5223 |
| <i>Majungasaurus crenatissimus</i>   | 48.3     | 637.3392                                    | 508.1495                         | 647.7459913                                | 715.4335          | 425.5376  | 1005.3294 |
| <i>Dilong paradoxus</i>              | 27       | 490.8678                                    | 388.3028                         | 506.88412                                  | 468.218           | 214.1662  | 722.2699  |
| <i>Albertosaurus sarcophagus</i>     | 71       | 793.4378                                    | 635.8734                         | 797.8663893                                | 978.8978          | 620.9812  | 1336.8144 |
| <i>Gorgosaurus libratus</i>          | 68.5     | 776.2463                                    | 621.8069                         | 781.3333059                                | 949.8819          | 600.491   | 1299.2729 |
| <i>Tarbosaurus bataar</i>            | 65.1     | 752.8659                                    | 602.6764                         | 758.8483123                                | 910.4203          | 572.2776  | 1248.563  |
| <i>Tyrannosaurus rex</i>             | 66.5     | 762.4931                                    | 610.5537                         | 768.1068391                                | 926.6692          | 583.94542 | 1269.393  |
| <i>Tyrannosaurus rex</i>             | 71       | 793.4378                                    | 635.8734                         | 797.8663893                                | 978.8978          | 620.98125 | 1336.8144 |
| <i>Tyrannosaurus rex</i>             | 68.3     | 774.871                                     | 620.6816                         | 780.0106592                                | 947.5607          | 598.84277 | 1296.2786 |
| <i>Tyrannosaurus rex</i> *           | 68.7     | 777.6216                                    | 622.9322                         | 782.6559525                                | 952.2032          | 602.1379  | 1302.2685 |
| <i>Garudimimus brevipes</i>          | 28.8     | 503.2456                                    | 398.4307                         | 518.7879401                                | 489.1095          | 233.4306  | 744.7884  |
| <i>Ornithomimus edmontonensis</i>    | 31.4     | 521.1248                                    | 413.0599                         | 535.9823469                                | 519.286           | 260.7588  | 777.8133  |
| <i>Dromiceiomimus brevitertius</i>   | 29.4     | 507.3716                                    | 401.8067                         | 522.7558801                                | 496.0733          | 239.7889  | 752.3578  |
| <i>Struthiomimus altus</i>           | 32.5     | 528.689                                     | 419.2491                         | 543.2569037                                | 532.053           | 272.1475  | 791.9586  |
| <i>Citipati osmolskae</i>            | 31.5     | 521.8124                                    | 413.6225                         | 536.6436703                                | 520.4467          | 261.7983  | 779.095   |
| <i>Saurornitholestes langstoni</i>   | 34.8     | 544.5052                                    | 432.1903                         | 558.4673405                                | 558.7476          | 295.6369  | 821.8584  |
| <i>Bambiraptor feinbergi</i>         | 28.5     | 501.1827                                    | 396.7427                         | 516.8039701                                | 485.6276          | 230.2397  | 741.0155  |
| <i>Velociraptor mongoliensis</i>     | 35.7     | 550.6941                                    | 437.2543                         | 564.4192505                                | 569.1934          | 304.712   | 833.6747  |
| <i>Troodon formosus</i>              | 33.2     | 533.5026                                    | 423.1878                         | 547.886167                                 | 540.1775          | 279.34231 | 801.0126  |
| <i>Troodon formosus</i>              | 33.5     | 535.5656                                    | 424.8757                         | 549.8701371                                | 543.6594          | 282.41344 | 804.9053  |
| <i>Troodon formosus</i>              | 32.6     | 529.3767                                    | 419.8118                         | 543.918227                                 | 533.2137          | 273.17779 | 793.2495  |
| <i>Troodon formosus</i>              | 33       | 532.1273                                    | 422.0624                         | 546.5635204                                | 537.8562          | 277.29078 | 798.4216  |
| <i>Troodon formosus</i> *            | 33.1     | 532.815                                     | 422.6251                         | 547.2248437                                | 539.0168          | 278.317   | 799.7167  |
| <i>Archaeopteryx lithographica</i>   | 17.1     | 422.7895                                    | 332.5994                         | 441.4131094                                | 353.3151          | 102.9525  | 603.6776  |
| <i>Confuciusornis sanctus</i>        | 17.9     | 428.2908                                    | 337.1007                         | 446.7036961                                | 362.6002          | 112.2763  | 612.9241  |
| <i>Hesperornis regalis</i>           | 15.3     | 410.4117                                    | 322.4715                         | 429.5092893                                | 332.4236          | 81.75645  | 583.0908  |



|                                |      |          |          |             |          |           |           |
|--------------------------------|------|----------|----------|-------------|----------|-----------|-----------|
| <i>Hesperornis regalis</i>     | 21.3 | 451.6712 | 356.2312 | 469.1886897 | 402.0618 | 151.23762 | 652.886   |
| <i>Hesperornis regalis</i> *   | 18.3 | 431.0414 | 339.3513 | 449.3489895 | 367.2427 | 116.9158  | 617.5697  |
| <i>Ichthyornis dispar</i>      | 18.1 | 429.6661 | 338.226  | 448.0263428 | 364.9214 | 114.5979  | 615.245   |
| <i>Lithornis plebius</i>       | 36.5 | 556.1954 | 441.7555 | 569.7098372 | 578.4785 | 312.7251  | 844.2318  |
| <i>Lithornis promiscuus</i>    | 37.7 | 564.4473 | 448.5075 | 577.6457173 | 592.4061 | 324.6515  | 860.1607  |
| <i>Deinonychus antirrhopus</i> | 41   | 587.14   | 467.0753 | 599.4693875 | 630.7071 | 356.8918  | 904.5223  |
| <i>Tsaagan mangas</i>          | 36   | 552.7571 | 438.9422 | 566.4032206 | 572.6753 | 307.7228  | 837.6277  |
| <i>Viavenator exxoni</i>       | 57   | 697.1655 | 557.1009 | 705.2811218 | 816.4088 | 503.2184  | 1129.5992 |
| <i>Erlikosaurus andrewsi</i>   | 40   | 580.2635 | 461.4487 | 592.8561541 | 619.1007 | 347.2063  | 890.9951  |
| <i>Euoplocephalus sp</i>       | 52   | 662.7825 | 528.9679 | 672.2149549 | 758.377  | 459.0728  | 1057.6813 |
| <i>Pawpawsaurus campbelli</i>  | 46.2 | 622.8983 | 496.3336 | 633.8582012 | 691.0601 | 406.1437  | 975.9766  |
| <i>Panoplosaurus mirus</i>     | 44   | 607.7698 | 483.9551 | 619.3090877 | 665.5261 | 385.5273  | 945.525   |

**Supplementary Table S7.** Representative reptilian OR genes used to find orthologous sequences in bird genomes, using 65% identity as a threshold.

| Olfactory Receptor                                                    | Source        |
|-----------------------------------------------------------------------|---------------|
| XM_006035034.1 PREDICTED: Alligator sinensis olfactory receptor 4E1   | RefSeq<br>[6] |
| XM_006039314.1 PREDICTED: Alligator sinensis olfactory receptor 52L1  |               |
| XM_006032220.2 PREDICTED: Alligator sinensis olfactory receptor 1052  |               |
| XM_006032219.1 PREDICTED: Alligator sinensis olfactory receptor 1052  |               |
| XM_014526796.1 PREDICTED: Alligator sinensis olfactory receptor 2AP1  |               |
| XM_006038492.1 PREDICTED: Alligator sinensis olfactory receptor 6B1   |               |
| XM_014527740.1 PREDICTED: Alligator sinensis olfactory receptor 6C75  |               |
| XM_006038961.2 PREDICTED: Alligator sinensis olfactory receptor 10A2  |               |
| XM_014527570.1 PREDICTED: Alligator sinensis olfactory receptor 6F1   |               |
| XM_006035991.2 PREDICTED: Alligator sinensis olfactory receptor 10A5  |               |
| XM_014527671.1 PREDICTED: Alligator sinensis olfactory receptor 10A3  |               |
| XM_006034106.2 PREDICTED: Alligator sinensis olfactory receptor 6     |               |
| XM_006039013.2 PREDICTED: Alligator sinensis olfactory receptor 14A16 |               |
| XM_006034107.1 PREDICTED: Alligator sinensis olfactory receptor 12    |               |
| XM_006035018.1 PREDICTED: Alligator sinensis olfactory receptor 6C4   |               |
| XM_006036718.1 PREDICTED: Alligator sinensis olfactory receptor 52B2  |               |
| XM_006032241.2 PREDICTED: Alligator sinensis olfactory receptor 2G3   |               |
| XM_006031572.2 PREDICTED: Alligator sinensis olfactory receptor 5B21  |               |
| XM_006032244.1 PREDICTED: Alligator sinensis olfactory receptor 1052  |               |
| XM_014524909.1 PREDICTED: Alligator sinensis olfactory receptor 6P1   |               |
| XM_006035017.1 PREDICTED: Alligator sinensis olfactory receptor 6C4   |               |
| XM_006032228.2 PREDICTED: Alligator sinensis olfactory receptor 5AR1  |               |
| XM_006036717.1 PREDICTED: Alligator sinensis olfactory receptor 52D1  |               |
| XM_006032217.1 PREDICTED: Alligator sinensis olfactory receptor 1019  |               |
| XM_014526923.1 PREDICTED: Alligator sinensis olfactory receptor 51Q1  |               |
| XM_006037936.1 PREDICTED: Alligator sinensis olfactory receptor 51G2  |               |
| XM_006036778.1 PREDICTED: Alligator sinensis olfactory receptor 1020  |               |
| XM_006032087.1 PREDICTED: Alligator sinensis olfactory receptor 52R1  |               |
| XM_014523915.1 PREDICTED: Alligator sinensis olfactory receptor 51S1  |               |
| XM_006032091.1 PREDICTED: Alligator sinensis olfactory receptor 51L1  |               |
| XM_006035000.1 PREDICTED: Alligator sinensis olfactory receptor 4E1   |               |
| XM_006039093.1 PREDICTED: Alligator sinensis olfactory receptor 12D2  |               |
| XM_014524856.1 PREDICTED: Alligator sinensis olfactory receptor 4S2   |               |
| XM_006036061.1 PREDICTED: Alligator sinensis olfactory receptor 4S2   |               |
| XM_006037726.1 PREDICTED: Alligator sinensis olfactory receptor 4N2   |               |
| XM_006038500.1 PREDICTED: Alligator sinensis olfactory receptor 6F1   |               |
| XM_006032092.1 PREDICTED: Alligator sinensis olfactory receptor 51E2  |               |
| XM_006033957.1 PREDICTED: Alligator sinensis olfactory receptor 4S2   |               |
| XM_006034122.1 PREDICTED: Alligator sinensis olfactory receptor 6N1   |               |
| XM_014526782.1 PREDICTED: Alligator sinensis olfactory receptor 10T2  |               |
| XM_006032221.2 PREDICTED: Alligator sinensis olfactory receptor COR8  |               |
| XM_006034790.2 PREDICTED: Alligator sinensis olfactory receptor COR4  |               |
| XM_014523649.1 PREDICTED: Alligator sinensis olfactory receptor 10A7  |               |
| XM_014523977.1 PREDICTED: Alligator sinensis olfactory receptor 1019  |               |
| XM_014526594.1 PREDICTED: Alligator sinensis olfactory receptor 52A5  |               |
| XM_006032247.1 PREDICTED: Alligator sinensis olfactory receptor 1009  |               |
| XM_006020988.2 PREDICTED: Alligator sinensis olfactory receptor 2A5   |               |
| XM_006039254.1 PREDICTED: Alligator sinensis olfactory receptor 10A7  |               |
| XM_006031595.1 PREDICTED: Alligator sinensis olfactory receptor 6M1   |               |
| XM_006039174.1 PREDICTED: Alligator sinensis olfactory receptor 4D9   |               |
| XM_006034999.1 PREDICTED: Alligator sinensis olfactory receptor 49    |               |
| XM_006031590.2 PREDICTED: Alligator sinensis olfactory receptor 1052  |               |
| XM_014527682.1 PREDICTED: Alligator sinensis olfactory receptor 6F1   |               |

|                                                                               |  |
|-------------------------------------------------------------------------------|--|
| XM_006032090.2 PREDICTED: Alligator sinensis olfactory receptor 51G2          |  |
| XM_006039094.1 PREDICTED: Alligator sinensis olfactory receptor 12D3          |  |
| XM_014524214.1 PREDICTED: Alligator sinensis olfactory receptor 10R2          |  |
| XM_006039141.1 PREDICTED: Alligator sinensis olfactory receptor 6X1           |  |
| XM_006032222.1 PREDICTED: Alligator sinensis olfactory receptor 1052          |  |
| XM_006032242.1 PREDICTED: Alligator sinensis olfactory receptor 1013          |  |
| XM_006034789.1 PREDICTED: Alligator sinensis olfactory receptor 1019          |  |
| XM_006039298.1 PREDICTED: Alligator sinensis olfactory receptor 12D2          |  |
| XM_014525901.1 PREDICTED: Alligator sinensis olfactory receptor 1019          |  |
| XM_014526945.1 PREDICTED: Alligator sinensis olfactory receptor 10A7          |  |
| XM_006033958.1 PREDICTED: Alligator sinensis olfactory receptor 4S2           |  |
| XM_014527719.1 PREDICTED: Alligator sinensis olfactory receptor 4D9           |  |
| XM_006036686.1 PREDICTED: Alligator sinensis olfactory receptor 2AT4          |  |
| XM_006037243.2 PREDICTED: Alligator sinensis olfactory receptor 6X1           |  |
| XM_014526109.1 PREDICTED: Alligator sinensis olfactory receptor 14A16         |  |
| XM_006036787.1 PREDICTED: Alligator sinensis olfactory receptor 6F1           |  |
| XM_014527787.1 PREDICTED: Alligator sinensis olfactory receptor 52R1          |  |
| XM_006039137.2 PREDICTED: Alligator sinensis olfactory receptor 5V1           |  |
| XM_006035034.1 PREDICTED: Alligator sinensis olfactory receptor 4E1           |  |
| XM_014604867.2 PREDICTED: Alligator mississippiensis olfactory receptor COR4  |  |
| XM_019478665.1 PREDICTED: Alligator mississippiensis olfactory receptor 9G4   |  |
| XM_019488518.1 PREDICTED: Alligator mississippiensis olfactory receptor 2A12  |  |
| XM_014597746.1 PREDICTED: Alligator mississippiensis olfactory receptor 11A1  |  |
| XM_006269294.2 PREDICTED: Alligator mississippiensis olfactory receptor 1009  |  |
| XM_014611427.1 PREDICTED: Alligator mississippiensis olfactory receptor 49    |  |
| XM_019499955.1 PREDICTED: Alligator mississippiensis olfactory receptor 10AC1 |  |
| XM_006278564.2 PREDICTED: Alligator mississippiensis olfactory receptor 2A5   |  |
| XM_006274969.2 PREDICTED: Alligator mississippiensis olfactory receptor 10T2  |  |
| XM_014594828.1 PREDICTED: Alligator mississippiensis olfactory receptor 10A4  |  |
| XM_014597745.1 PREDICTED: Alligator mississippiensis olfactory receptor 1440  |  |
| XM_019482376.1 PREDICTED: Alligator mississippiensis olfactory receptor 52A5  |  |
| XM_006260764.3 PREDICTED: Alligator mississippiensis olfactory receptor 1052  |  |
| XM_006269293.1 PREDICTED: Alligator mississippiensis olfactory receptor 11A1  |  |
| XM_006271879.2 PREDICTED: Alligator mississippiensis olfactory receptor 10H1  |  |
| XM_006262992.2 PREDICTED: Alligator mississippiensis olfactory receptor 51G2  |  |
| XM_006267750.2 PREDICTED: Alligator mississippiensis olfactory receptor 2G3   |  |
| XM_006268318.2 PREDICTED: Alligator mississippiensis olfactory receptor 10C1  |  |
| XM_014609974.2 PREDICTED: Alligator mississippiensis olfactory receptor 4N2   |  |
| XM_019489818.1 PREDICTED: Alligator mississippiensis olfactory receptor 6F1   |  |
| XM_006262994.2 PREDICTED: Alligator mississippiensis olfactory receptor 51Q1  |  |
| XM_014597747.1 PREDICTED: Alligator mississippiensis olfactory receptor 6A2   |  |
| XM_014611430.1 PREDICTED: Alligator mississippiensis olfactory receptor 6M1   |  |
| XM_019489814.1 PREDICTED: Alligator mississippiensis olfactory receptor 6B1   |  |
| XM_006258018.2 PREDICTED: Alligator mississippiensis olfactory receptor 4M1   |  |
| XM_006262993.2 PREDICTED: Alligator mississippiensis olfactory receptor 51I2  |  |
| XM_006263697.2 PREDICTED: Alligator mississippiensis olfactory receptor 51I2  |  |
| XM_006268307.3 PREDICTED: Alligator mississippiensis olfactory receptor 10A4  |  |
| XM_006263040.1 PREDICTED: Alligator mississippiensis olfactory receptor 1038  |  |
| XM_006259095.1 PREDICTED: Alligator mississippiensis olfactory receptor 4D9   |  |
| XM_006260759.1 PREDICTED: Alligator mississippiensis olfactory receptor 1019  |  |
| XM_006267538.1 PREDICTED: Alligator mississippiensis olfactory receptor 1019  |  |
| XM_006268320.1 PREDICTED: Alligator mississippiensis olfactory receptor 10A7  |  |
| XM_014595168.1 PREDICTED: Alligator mississippiensis olfactory receptor 2A12  |  |
| XM_006278509.1 PREDICTED: Alligator mississippiensis olfactory receptor 4N5   |  |
| XM_014594485.1 PREDICTED: Alligator mississippiensis olfactory receptor 4S2   |  |
| XM_006268319.1 PREDICTED: Alligator mississippiensis olfactory receptor 10C1  |  |
| XM_006265550.1 PREDICTED: Alligator mississippiensis olfactory receptor 4S2   |  |

RefSeq [7]

|                                                                              |  |
|------------------------------------------------------------------------------|--|
| XM_006278498.1 PREDICTED: Alligator mississippiensis olfactory receptor 4S2  |  |
| XM_006278500.2 PREDICTED: Alligator mississippiensis olfactory receptor 4S2  |  |
| XM_019486358.1 PREDICTED: Alligator mississippiensis olfactory receptor 12D1 |  |
| XM_019496768.1 PREDICTED: Alligator mississippiensis olfactory receptor 4S2  |  |
| XM_019496752.1 PREDICTED: Alligator mississippiensis olfactory receptor 4S2  |  |
| XM_005311793.2 PREDICTED: Chrysemys picta bellii olfactory receptor 51G2     |  |
| XM_008175041.1 PREDICTED: Chrysemys picta bellii olfactory receptor 4D5      |  |
| XM_008176388.1 PREDICTED: Chrysemys picta bellii olfactory receptor 14A16    |  |
| XM_008175039.1 PREDICTED: Chrysemys picta bellii olfactory receptor 6F1      |  |
| XM_008175031.1 PREDICTED: Chrysemys picta bellii olfactory receptor 6B1      |  |
| XM_005309244.2 PREDICTED: Chrysemys picta bellii olfactory receptor 1468     |  |
| XM_008174413.1 PREDICTED: Chrysemys picta bellii olfactory receptor 14I1     |  |
| XM_005289441.2 PREDICTED: Chrysemys picta bellii olfactory receptor 2AT4     |  |
| XM_008175033.1 PREDICTED: Chrysemys picta bellii olfactory receptor 10A4     |  |
| XM_005309234.1 PREDICTED: Chrysemys picta bellii olfactory receptor 6B1      |  |
| XM_008175027.1 PREDICTED: Chrysemys picta bellii olfactory receptor 5        |  |
| XM_005314359.1 PREDICTED: Chrysemys picta bellii olfactory receptor 52E4     |  |
| XM_008178121.1 PREDICTED: Chrysemys picta bellii olfactory receptor 1019     |  |
| XM_008174412.1 PREDICTED: Chrysemys picta bellii olfactory receptor 4D2      |  |
| XM_008168738.1 PREDICTED: Chrysemys picta bellii olfactory receptor 14A16    |  |
| XM_005310841.1 PREDICTED: Chrysemys picta bellii olfactory receptor 5V1      |  |
| XM_005310413.1 PREDICTED: Chrysemys picta bellii olfactory receptor 12D2     |  |
| XM_008168730.1 PREDICTED: Chrysemys picta bellii olfactory receptor 14A16    |  |
| XM_008178018.1 PREDICTED: Chrysemys picta bellii olfactory receptor 52K1     |  |
| XM_008175965.1 PREDICTED: Chrysemys picta bellii olfactory receptor 1009     |  |
| XM_005311801.1 PREDICTED: Chrysemys picta bellii olfactory receptor 51G2     |  |
| XM_008177963.1 PREDICTED: Chrysemys picta bellii olfactory receptor 1019     |  |
| XM_005312774.1 PREDICTED: Chrysemys picta bellii olfactory receptor 4N2      |  |
| XM_008175572.1 PREDICTED: Chrysemys picta bellii olfactory receptor 51G2     |  |
| XM_005309056.2 PREDICTED: Chrysemys picta bellii olfactory receptor 6B1      |  |
| XM_008177588.1 PREDICTED: Chrysemys picta bellii olfactory receptor 52B2     |  |
| XM_008175561.1 PREDICTED: Chrysemys picta bellii olfactory receptor 51G2     |  |
| XM_005313796.2 PREDICTED: Chrysemys picta bellii olfactory receptor 6C75     |  |
| XM_008174336.1 PREDICTED: Chrysemys picta bellii olfactory receptor 6N1      |  |
| XM_008174338.1 PREDICTED: Chrysemys picta bellii olfactory receptor 12D2     |  |
| XM_005310393.1 PREDICTED: Chrysemys picta bellii olfactory receptor 6N1      |  |
| XM_005310272.1 PREDICTED: Chrysemys picta bellii olfactory receptor 11A1     |  |
| XM_005310292.2 PREDICTED: Chrysemys picta bellii olfactory receptor 14A16    |  |
| XM_005310408.1 PREDICTED: Chrysemys picta bellii olfactory receptor 6B1      |  |
| XM_008171713.1 PREDICTED: Chrysemys picta bellii olfactory receptor 1019     |  |
| XM_005310400.1 PREDICTED: Chrysemys picta bellii olfactory receptor 10C1     |  |
| XM_008177751.1 PREDICTED: Chrysemys picta bellii olfactory receptor 11A1     |  |
| XM_005309045.2 PREDICTED: Chrysemys picta bellii olfactory receptor 12       |  |
| XM_008175036.1 PREDICTED: Chrysemys picta bellii olfactory receptor 6B1      |  |
| XM_008176638.1 PREDICTED: Chrysemys picta bellii olfactory receptor 4Q2      |  |
| XM_005309255.1 PREDICTED: Chrysemys picta bellii olfactory receptor 6F1      |  |
| XM_005310439.2 PREDICTED: Chrysemys picta bellii olfactory receptor 14A16    |  |
| XM_008174340.1 PREDICTED: Chrysemys picta bellii olfactory receptor 11A1     |  |
| XM_005290034.1 PREDICTED: Chrysemys picta bellii olfactory receptor 52B2     |  |
| XM_005310406.1 PREDICTED: Chrysemys picta bellii olfactory receptor 10A7     |  |
| XM_005314585.2 PREDICTED: Chrysemys picta bellii olfactory receptor 14A16    |  |
| XM_005309064.1 PREDICTED: Chrysemys picta bellii olfactory receptor 10AG1    |  |
| XM_005314320.1 PREDICTED: Chrysemys picta bellii olfactory receptor 11A1     |  |
| XM_005311899.1 PREDICTED: Chrysemys picta bellii olfactory receptor 6N1      |  |
| XM_005290011.1 PREDICTED: Chrysemys picta bellii olfactory receptor 52B2     |  |
| XM_005309043.1 PREDICTED: Chrysemys picta bellii olfactory receptor 6P1      |  |
| XM_005309055.1 PREDICTED: Chrysemys picta bellii olfactory receptor 6B1      |  |

RefSeq [5]

|                                                                          |  |
|--------------------------------------------------------------------------|--|
| XM_005310422.1 PREDICTED: Chrysemys picta bellii olfactory receptor 6N1  |  |
| XM_008174332.1 PREDICTED: Chrysemys picta bellii olfactory receptor 6B1  |  |
| XM_008177992.1 PREDICTED: Chrysemys picta bellii olfactory receptor 10A7 |  |
| XM_005309019.1 PREDICTED: Chrysemys picta bellii olfactory receptor 1020 |  |
| XM_005313885.1 PREDICTED: Chrysemys picta bellii olfactory receptor 52K2 |  |
| XM_005310280.2 PREDICTED: Chrysemys picta bellii olfactory receptor 6F1  |  |
| XM_008174321.1 PREDICTED: Chrysemys picta bellii olfactory receptor 6N1  |  |
| XM_005309024.1 PREDICTED: Chrysemys picta bellii olfactory receptor 10C1 |  |
| XM_005311817.2 PREDICTED: Chrysemys picta bellii olfactory receptor 51G2 |  |
| XM_005312282.1 PREDICTED: Chrysemys picta bellii olfactory receptor 5V1  |  |
| XM_005290052.1 PREDICTED: Chrysemys picta bellii olfactory receptor 51G2 |  |
| XM_005313248.1 PREDICTED: Chrysemys picta bellii olfactory receptor 52R1 |  |
| XM_008178061.1 PREDICTED: Chrysemys picta bellii olfactory receptor 52P1 |  |
| XM_005314254.1 PREDICTED: Chrysemys picta bellii olfactory receptor 11A1 |  |
| XM_008174690.1 PREDICTED: Chrysemys picta bellii olfactory receptor 11A1 |  |
| XM_005310270.2 PREDICTED: Chrysemys picta bellii olfactory receptor 6N1  |  |
| XM_005309010.1 PREDICTED: Chrysemys picta bellii olfactory receptor 10A4 |  |
| XM_005313793.1 PREDICTED: Chrysemys picta bellii olfactory receptor 6C4  |  |
| XM_005284256.1 PREDICTED: Chrysemys picta bellii olfactory receptor 6B1  |  |
| XM_008177186.1 PREDICTED: Chrysemys picta bellii olfactory receptor 6N1  |  |
| XM_005290036.2 PREDICTED: Chrysemys picta bellii olfactory receptor 52B2 |  |
| XM_008177901.1 PREDICTED: Chrysemys picta bellii olfactory receptor 51E2 |  |
| XM_005309014.1 PREDICTED: Chrysemys picta bellii olfactory receptor 10A4 |  |
| XM_005310433.1 PREDICTED: Chrysemys picta bellii olfactory receptor 5V1  |  |
| XM_005312401.1 PREDICTED: Chrysemys picta bellii olfactory receptor 6F1  |  |
| XM_008174396.1 PREDICTED: Chrysemys picta bellii olfactory receptor 4M1  |  |
| XM_005311794.2 PREDICTED: Chrysemys picta bellii olfactory receptor 51G2 |  |
| XM_005310423.1 PREDICTED: Chrysemys picta bellii olfactory receptor 6N1  |  |
| XM_008174324.1 PREDICTED: Chrysemys picta bellii olfactory receptor 476  |  |
| XM_008177669.1 PREDICTED: Chrysemys picta bellii olfactory receptor 52B6 |  |
| XM_008174403.1 PREDICTED: Chrysemys picta bellii olfactory receptor 4D9  |  |
| XM_008177073.1 PREDICTED: Chrysemys picta bellii olfactory receptor 11A1 |  |
| XM_005309054.2 PREDICTED: Chrysemys picta bellii olfactory receptor 1038 |  |
| XM_005309062.1 PREDICTED: Chrysemys picta bellii olfactory receptor 11L1 |  |
| XM_008177845.1 PREDICTED: Chrysemys picta bellii olfactory receptor 52K1 |  |
| XM_005309038.2 PREDICTED: Chrysemys picta bellii olfactory receptor 6B1  |  |
| XM_005310284.2 PREDICTED: Chrysemys picta bellii olfactory receptor 1038 |  |
| Pm066                                                                    |  |
| Pm091                                                                    |  |
| Pm010                                                                    |  |
| Pm120                                                                    |  |
| Pm047                                                                    |  |
| Pm068                                                                    |  |
| Pm020                                                                    |  |
| Pm046                                                                    |  |
| Pm055                                                                    |  |
| Pm136                                                                    |  |
| Pm045                                                                    |  |
| Pm148                                                                    |  |
| Pm070                                                                    |  |
| Pm119                                                                    |  |
| Pm014                                                                    |  |
| Pm053                                                                    |  |
| Pm030                                                                    |  |
| Pm036                                                                    |  |
| Pm049                                                                    |  |
| Pm088                                                                    |  |

|         |
|---------|
| Pm115   |
| Pm005   |
| Pm132   |
| Pm057   |
| Pm123   |
| Pm004   |
| Pm096   |
| Pm023   |
| Pm054   |
| Pm155 P |
| Pm171 T |
| Pm207 T |
| Pm213 T |
| Pm223 T |
| Pm222 T |
| Pm209 T |
| Pm248 T |
| Pm250 T |
| Pm271 T |
| Pm275 T |
| Pm277 T |
| Pm184 T |
| Pm195 T |
| Pm188 T |
| Pm243 T |
| Pm219 T |
| Pm279 T |
| Pm178 T |
| Pm252 T |
| Pm204 T |
| Ac93    |
| Ac89    |
| Ac75    |
| Ac109   |
| Ac110   |
| Ac52    |
| Ac98    |
| Ac106   |
| Ac131   |
| Ac59    |
| Ac3     |
| Ac91    |
| Ac125   |
| Ac112   |
| Ac119   |
| Ac44    |
| Ac103   |
| Ac27    |
| Ac20    |
| Ac37    |
| Ac87    |
| Ac81    |

**Supplementary Table S8.** Query reptilian OR genes were used to find orthologs in birds with 65% shared amino acid identity. The query, orthologs, sequence lengths and shared identities for all sequences used are displayed.

| Query Reptile sequence                                                | Length<br>(amino acids) | Bird orthologs                          | Shared<br>amino acids | Bird OR<br>length | %<br>identity |
|-----------------------------------------------------------------------|-------------------------|-----------------------------------------|-----------------------|-------------------|---------------|
| XM_006035034.1 PREDICTED: Alligator sinensis olfactory receptor 4E1   | 377                     | Struthio camelus OR4                    | 207                   | 300               | 69%           |
| XM_006039314.1 PREDICTED: Alligator sinensis olfactory receptor 52L1  | 229                     | Struthio camelus OR52                   | 130                   | 178               | 73%           |
| XM_006032220.2 PREDICTED: Alligator sinensis olfactory receptor 1052  | 375                     | Anas platyrhynchos OR5                  | 221                   | 305               | 72%           |
| XM_006032219.1 PREDICTED: Alligator sinensis olfactory receptor 1052  | 370                     | Anas platyrhynchos OR5                  | 201                   | 305               | 66%           |
| XM_014526796.1 PREDICTED: Alligator sinensis olfactory receptor 2AP1  | 367                     | Aptenodytes forsteri OR10               | 200                   | 307               | 65%           |
| XM_006038492.1 PREDICTED: Alligator sinensis olfactory receptor 6B1   | 364                     | Cathartes aura OR6                      | 249                   | 307               | 81%           |
| XM_014527740.1 PREDICTED: Alligator sinensis olfactory receptor 6C75  | 360                     | Fulmarus glacialis OR6                  | 210                   | 300               | 70%           |
| XM_006038961.2 PREDICTED: Alligator sinensis olfactory receptor 10A2  | 562                     | Pterocles gutturalis OR10               | 212                   | 294               | 72%           |
| XM_014527570.1 PREDICTED: Alligator sinensis olfactory receptor 6F1   | 355                     | Nestor notabilis OR6                    | 212                   | 306               | 69%           |
| XM_006035991.2 PREDICTED: Alligator sinensis olfactory receptor 10A5  | 348                     | Tinamus guttatus OR10                   | 184                   | 270               | 68%           |
| XM_014527671.1 PREDICTED: Alligator sinensis olfactory receptor 10A3  | 346                     | Charadrius vociferus OR10               | 189                   | 270               | 70%           |
| XM_006034106.2 PREDICTED: Alligator sinensis olfactory receptor 6     | 344                     | Antrostomus carolinensis OR6 Pseudogene | 139                   | 215               | 65%           |
| XM_006039013.2 PREDICTED: Alligator sinensis olfactory receptor 14A16 | 344                     | Nipponia nippon OR14                    | 200                   | 307               | 65%           |
| XM_006034107.1 PREDICTED: Alligator sinensis olfactory receptor 12    | 342                     | Balearica regulorum OR14                | 223                   | 308               | 72%           |
| XM_006035018.1 PREDICTED: Alligator sinensis olfactory receptor 6C4   | 342                     | Charadrius vociferus OR6                | 217                   | 308               | 70%           |
| XM_006036718.1 PREDICTED: Alligator sinensis olfactory receptor 52B2  | 342                     | Meleagris gallopavo OR52                | 213                   | 304               | 70%           |
| XM_006032241.2 PREDICTED: Alligator sinensis olfactory receptor 2G3   | 337                     | Cathartes aura OR13                     | 228                   | 309               | 74%           |
| XM_006031572.2 PREDICTED: Alligator sinensis olfactory receptor 5B21  | 510                     | Phoenicopus ruber OR13                  | 197                   | 304               | 65%           |
| XM_006032244.1 PREDICTED: Alligator sinensis olfactory receptor 1052  | 336                     | Charadrius vociferus OR5                | 208                   | 311               | 67%           |
| XM_014524909.1 PREDICTED: Alligator sinensis olfactory receptor 6P1   | 336                     | Aptenodytes forsteri OR5                | 187                   | 273               | 68%           |
| XM_006035017.1 PREDICTED: Alligator sinensis olfactory receptor 6C4   | 334                     | Nipponia nippon OR6                     | 205                   | 300               | 68%           |
| XM_006032228.2 PREDICTED: Alligator sinensis olfactory receptor 5AR1  | 333                     | Cathartes aura OR5                      | 241                   | 313               | 77%           |
| XM_006036717.1 PREDICTED: Alligator sinensis olfactory receptor 52D1  | 333                     | Struthio camelus OR52                   | 217                   | 303               | 72%           |
| XM_006032217.1 PREDICTED: Alligator sinensis olfactory receptor 1019  | 332                     | Fulmarus glacialis OR5                  | 221                   | 307               | 72%           |
| XM_014526923.1 PREDICTED: Alligator sinensis olfactory receptor 51Q1  | 330                     | Columba livia OR51                      | 203                   | 305               | 67%           |
| XM_006037936.1 PREDICTED: Alligator sinensis olfactory receptor 51G2  | 328                     | Tinamus guttatus OR51                   | 171                   | 225               | 76%           |
| XM_006036778.1 PREDICTED: Alligator sinensis olfactory receptor 1020  | 477                     | Phaeton lepturus OR10                   | 209                   | 313               | 67%           |
| XM_006032087.1 PREDICTED: Alligator sinensis olfactory receptor 52R1  | 325                     | Gavia stellata OR52                     | 224                   | 308               | 73%           |
| XM_014523915.1 PREDICTED: Alligator sinensis olfactory receptor 51S1  | 325                     | Struthio camelus OR51 Pseudogene        | 142                   | 200               | 71%           |
| XM_006032091.1 PREDICTED: Alligator sinensis olfactory receptor 51L1  | 324                     | Struthio camelus OR51                   | 195                   | 298               | 65%           |
| XM_006035000.1 PREDICTED: Alligator sinensis olfactory receptor 4E1   | 459                     | Struthio camelus OR4                    | 243                   | 301               | 81%           |
| XM_006039093.1 PREDICTED: Alligator sinensis olfactory receptor 12D2  | 322                     | Cariama cristata OR12                   | 230                   | 309               | 74%           |
| XM_014524856.1 PREDICTED: Alligator sinensis olfactory receptor 4S2   | 321                     | Phaeton lepturus OR4                    | 201                   | 309               | 65%           |

|                                                                       |     |                           |     |     |     |
|-----------------------------------------------------------------------|-----|---------------------------|-----|-----|-----|
| XM 006036061.1 PREDICTED: Alligator sinensis olfactory receptor 4S2   | 320 | Gavia stellata OR4        | 211 | 312 | 68% |
| XM 006037726.1 PREDICTED: Alligator sinensis olfactory receptor 4N2   | 320 | Cathartes aura OR4        | 227 | 320 | 71% |
| XM 006038500.1 PREDICTED: Alligator sinensis olfactory receptor 6F1   | 433 | Cuculus canorus OR5       | 206 | 310 | 66% |
| XM 006032092.1 PREDICTED: Alligator sinensis olfactory receptor 51E2  | 319 | Phaeton lepturus OR51     | 241 | 319 | 76% |
| XM 006033957.1 PREDICTED: Alligator sinensis olfactory receptor 4S2   | 319 | Struthio camelus OR4      | 226 | 307 | 74% |
| XM 006034122.1 PREDICTED: Alligator sinensis olfactory receptor 6N1   | 319 | Gavia stellata OR10       | 259 | 307 | 84% |
| XM 014526782.1 PREDICTED: Alligator sinensis olfactory receptor 10T2  | 430 | Charadrius vociferus OR10 | 215 | 307 | 70% |
| XM 006032221.2 PREDICTED: Alligator sinensis olfactory receptor COR8  | 318 | Gallus gallus OR5         | 230 | 315 | 73% |
| XM 006034790.2 PREDICTED: Alligator sinensis olfactory receptor COR4  | 318 | Phaeton lepturus OR5      | 215 | 308 | 70% |
| XM 014523649.1 PREDICTED: Alligator sinensis olfactory receptor 10A7  | 318 | Nipponia nippon OR5       | 201 | 306 | 66% |
| XM 014523977.1 PREDICTED: Alligator sinensis olfactory receptor 10I9  | 318 | Anas platyrhynchos OR5    | 200 | 309 | 65% |
| XM 014526594.1 PREDICTED: Alligator sinensis olfactory receptor 52A5  | 318 | Struthio camelus OR52     | 212 | 316 | 67% |
| XM 006032247.1 PREDICTED: Alligator sinensis olfactory receptor 1009  | 317 | Tyto alba OR5             | 202 | 308 | 66% |
| XM 006020988.2 PREDICTED: Alligator sinensis olfactory receptor 2A5   | 316 | Struthio camelus OR2      | 238 | 303 | 79% |
| XM 006039254.1 PREDICTED: Alligator sinensis olfactory receptor 10A7  | 421 | Tinamus guttatus OR10     | 196 | 301 | 65% |
| XM 006031595.1 PREDICTED: Alligator sinensis olfactory receptor 6M1   | 316 | Opisthocomus hoazin OR6   | 208 | 316 | 66% |
| XM 006039174.1 PREDICTED: Alligator sinensis olfactory receptor 4D9   | 316 | Pterocles gutturalis OR4  | 206 | 314 | 66% |
| XM 006034999.1 PREDICTED: Alligator sinensis olfactory receptor 49    | 316 | Nipponia nippon OR6       | 214 | 307 | 70% |
| XM 006031590.2 PREDICTED: Alligator sinensis olfactory receptor 1052  | 419 | Balearica regulorum OR13  | 189 | 283 | 67% |
| XM 014527682.1 PREDICTED: Alligator sinensis olfactory receptor 6F1   | 315 | Tinamus guttatus OR6      | 227 | 310 | 73% |
| XM 006032090.2 PREDICTED: Alligator sinensis olfactory receptor 51G2  | 314 | Struthio camelus OR51     | 249 | 303 | 82% |
| XM 006039094.1 PREDICTED: Alligator sinensis olfactory receptor 12D3  | 314 | Cariama cristata OR12     | 230 | 314 | 73% |
| XM 014524214.1 PREDICTED: Alligator sinensis olfactory receptor 10R2  | 314 | Balearica regulorum OR10  | 211 | 298 | 71% |
| XM 006039141.1 PREDICTED: Alligator sinensis olfactory receptor 6X1   | 409 | Fulmarus glacialis OR6    | 153 | 231 | 66% |
| XM 006032222.1 PREDICTED: Alligator sinensis olfactory receptor 1052  | 313 | Struthio camelus OR5      | 225 | 311 | 72% |
| XM 006032242.1 PREDICTED: Alligator sinensis olfactory receptor 10I3  | 313 | Gavia stellata OR9        | 222 | 312 | 71% |
| XM 006034789.1 PREDICTED: Alligator sinensis olfactory receptor 10I9  | 313 | Fulmarus glacialis OR5    | 218 | 311 | 70% |
| XM 006039298.1 PREDICTED: Alligator sinensis olfactory receptor 12D2  | 313 | Cariama cristata OR12     | 210 | 309 | 68% |
| XM 014525901.1 PREDICTED: Alligator sinensis olfactory receptor 10I9  | 313 | Struthio camelus OR5      | 234 | 311 | 75% |
| XM 014526945.1 PREDICTED: Alligator sinensis olfactory receptor 10A7  | 313 | Tinamus guttatus OR10     | 223 | 301 | 74% |
| XM 006033958.1 PREDICTED: Alligator sinensis olfactory receptor 4S2   | 403 | Gavia stellata OR4        | 262 | 312 | 84% |
| XM 014527719.1 PREDICTED: Alligator sinensis olfactory receptor 4D9   | 400 | Geospiza fortis OR4       | 203 | 303 | 67% |
| XM 006036686.1 PREDICTED: Alligator sinensis olfactory receptor 2AT4  | 396 | Nipponia nippon OR2       | 231 | 312 | 74% |
| XM 006037243.2 PREDICTED: Alligator sinensis olfactory receptor 6X1   | 311 | Aptenodytes forsteri OR2  | 217 | 309 | 70% |
| XM 014526109.1 PREDICTED: Alligator sinensis olfactory receptor 14A16 | 307 | Columba livia OR14        | 203 | 306 | 66% |
| XM 006036787.1 PREDICTED: Alligator sinensis olfactory receptor 6F1   | 298 | Cathartes aura OR6        | 195 | 299 | 65% |
| XM 014527787.1 PREDICTED: Alligator sinensis olfactory receptor 52R1  | 277 | Gavia stellata OR52       | 164 | 224 | 73% |
| XM 006039137.2 PREDICTED: Alligator sinensis olfactory receptor 5V1   | 261 | Aptenodytes forsteri OR10 | 131 | 203 | 65% |



|                                                                               |     |                               |     |     |     |
|-------------------------------------------------------------------------------|-----|-------------------------------|-----|-----|-----|
| XM 006035034.1 PREDICTED: Alligator sinensis olfactory receptor 4E1           | 377 | Struthio camelus OR4          | 207 | 300 | 69% |
| XM 014604867.2 PREDICTED: Alligator mississippiensis olfactory receptor COR4  | 334 | Gallus gallus OR5             | 201 | 305 | 66% |
| XM 019478665.1 PREDICTED: Alligator mississippiensis olfactory receptor 9G4   | 160 | Phoenicopterus ruber OR6      | 68  | 93  | 73% |
| XM 019488518.1 PREDICTED: Alligator mississippiensis olfactory receptor 2A12  | 363 | Fulmarus glacialis OR2        | 200 | 305 | 66% |
| XM 014597746.1 PREDICTED: Alligator mississippiensis olfactory receptor 11A1  | 357 | Phoenicopterus ruber OR6      | 205 | 306 | 67% |
| XM 006269294.2 PREDICTED: Alligator mississippiensis olfactory receptor 1009  | 353 | Nipponia nippon OR5           | 200 | 310 | 65% |
| XM 014611427.1 PREDICTED: Alligator mississippiensis olfactory receptor 49    | 331 | Fulmarus glacialis OR6        | 215 | 324 | 66% |
| XM 019499955.1 PREDICTED: Alligator mississippiensis olfactory receptor 10AC1 | 331 | Podiceps cristatus OR10       | 245 | 326 | 75% |
| XM 006278564.2 PREDICTED: Alligator mississippiensis olfactory receptor 2A5   | 328 | Charadrius vociferus OR2      | 205 | 306 | 67% |
| XM 006274969.2 PREDICTED: Alligator mississippiensis olfactory receptor 10T2  | 326 | Charadrius vociferus OR10     | 229 | 303 | 76% |
| XM 006274969.2 PREDICTED: Alligator mississippiensis olfactory receptor 10T2  | 326 | Charadrius vociferus OR10     | 229 | 303 | 76% |
| XM 014594828.1 PREDICTED: Alligator mississippiensis olfactory receptor 10A4  | 326 | Charadrius vociferus OR10     | 216 | 308 | 70% |
| XM 014597745.1 PREDICTED: Alligator mississippiensis olfactory receptor 1440  | 325 | Phoenicopterus ruber OR10     | 164 | 247 | 66% |
| XM 019482376.1 PREDICTED: Alligator mississippiensis olfactory receptor 52A5  | 469 | Struthio camelus OR52         | 195 | 279 | 70% |
| XM 006260764.3 PREDICTED: Alligator mississippiensis olfactory receptor 1052  | 324 | Anas platyrhynchos OR5        | 205 | 305 | 67% |
| XM 006269293.1 PREDICTED: Alligator mississippiensis olfactory receptor 11A1  | 324 | Fulmarus glacialis OR10       | 146 | 226 | 65% |
| XM 006271879.2 PREDICTED: Alligator mississippiensis olfactory receptor 10H1  | 324 | Haliaeetus leucocephalus OR10 | 200 | 308 | 65% |
| XM 006262992.2 PREDICTED: Alligator mississippiensis olfactory receptor 51G2  | 322 | Tinamus guttatus OR51         | 231 | 318 | 73% |
| XM 006267750.2 PREDICTED: Alligator mississippiensis olfactory receptor 2G3   | 321 | Melopsittacus undulatus OR10  | 197 | 303 | 65% |
| XM 006268318.2 PREDICTED: Alligator mississippiensis olfactory receptor 10C1  | 321 | Cathartes aura OR10           | 237 | 316 | 75% |
| XM 014609974.2 PREDICTED: Alligator mississippiensis olfactory receptor 4N2   | 320 | Cathartes aura OR4            | 235 | 312 | 75% |
| XM 019489818.1 PREDICTED: Alligator mississippiensis olfactory receptor 6F1   | 320 | Aptenodytes forsteri OR4      | 208 | 303 | 69% |
| XM 006262994.2 PREDICTED: Alligator mississippiensis olfactory receptor 51Q1  | 318 | Columba livia OR51            | 226 | 303 | 75% |
| XM 014597747.1 PREDICTED: Alligator mississippiensis olfactory receptor 6A2   | 318 | Nipponia nippon OR6           | 209 | 318 | 66% |
| XM 014611430.1 PREDICTED: Alligator mississippiensis olfactory receptor 6M1   | 318 | Pygoscelis adeliae OR6        | 227 | 313 | 73% |
| XM 019489814.1 PREDICTED: Alligator mississippiensis olfactory receptor 6B1   | 318 | Fulmarus glacialis OR10       | 148 | 227 | 65% |
| XM 006258018.2 PREDICTED: Alligator mississippiensis olfactory receptor 4M1   | 315 | Pterocles gutturalis OR4      | 215 | 309 | 70% |
| XM 006262993.2 PREDICTED: Alligator mississippiensis olfactory receptor 51I2  | 315 | Struthio camelus OR51         | 242 | 309 | 78% |
| XM 006263697.2 PREDICTED: Alligator mississippiensis olfactory receptor 51I2  | 315 | Struthio camelus OR51         | 214 | 309 | 69% |
| XM 006268307.3 PREDICTED: Alligator mississippiensis olfactory receptor 10A4  | 315 | Tinamus guttatus OR10         | 189 | 270 | 70% |
| XM 006263040.1 PREDICTED: Alligator mississippiensis olfactory receptor 1038  | 314 | Struthio camelus OR5          | 234 | 307 | 76% |
| XM 006259095.1 PREDICTED: Alligator mississippiensis olfactory receptor 4D9   | 313 | Gavia stellata OR4            | 203 | 312 | 65% |
| XM 006260759.1 PREDICTED: Alligator mississippiensis olfactory receptor 1019  | 310 | Fulmarus glacialis OR5        | 221 | 307 | 72% |
| XM 006260759.1 PREDICTED: Alligator mississippiensis olfactory receptor 1019  | 313 | Fulmarus glacialis OR5        | 220 | 305 | 72% |
| XM 006267538.1 PREDICTED: Alligator mississippiensis olfactory receptor 1019  | 313 | Struthio camelus OR5          | 224 | 310 | 72% |
| XM 006268320.1 PREDICTED: Alligator mississippiensis olfactory receptor 10A7  | 313 | Tinamus guttatus OR10         | 213 | 303 | 70% |
| XM 014595168.1 PREDICTED: Alligator mississippiensis olfactory receptor 2A12  | 313 | Nipponia nippon OR2           | 212 | 313 | 68% |
| XM 006278509.1 PREDICTED: Alligator mississippiensis olfactory receptor 4N5   | 312 | Pygoscelis adeliae OR4        | 207 | 304 | 68% |

|                                                                              |     |                              |     |     |     |
|------------------------------------------------------------------------------|-----|------------------------------|-----|-----|-----|
| XM 014594485.1 PREDICTED: Alligator mississippiensis olfactory receptor 4S2  | 312 | Phaeton lepturus OR4         | 218 | 312 | 70% |
| XM 006268319.1 PREDICTED: Alligator mississippiensis olfactory receptor 10C1 | 311 | Columba livia OR10           | 219 | 305 | 72% |
| XM 006265550.1 PREDICTED: Alligator mississippiensis olfactory receptor 4S2  | 310 | Struthio camelus OR4         | 220 | 308 | 71% |
| XM 006278498.1 PREDICTED: Alligator mississippiensis olfactory receptor 4S2  | 310 | Phaeton lepturus OR4         | 227 | 310 | 73% |
| XM 006278500.2 PREDICTED: Alligator mississippiensis olfactory receptor 4S2  | 310 | Phaeton lepturus OR4         | 231 | 310 | 75% |
| XM 019486358.1 PREDICTED: Alligator mississippiensis olfactory receptor 12D1 | 308 | Pterocles gutturalis OR12    | 171 | 259 | 66% |
| XM 019496768.1 PREDICTED: Alligator mississippiensis olfactory receptor 4S2  | 302 | Podiceps cristatus OR4       | 195 | 300 | 65% |
| XM 019496752.1 PREDICTED: Alligator mississippiensis olfactory receptor 4S2  | 292 | Struthio camelus OR4         | 186 | 249 | 75% |
| XM 005311793.2 PREDICTED: Chrysemys picta bellii olfactory receptor 51G2     | 596 | Tinamus guttatus OR51        | 224 | 301 | 74% |
| XM 008175041.1 PREDICTED: Chrysemys picta bellii olfactory receptor 4D5      | 229 | Pterocles gutturalis OR4     | 142 | 209 | 68% |
| XM 008176388.1 PREDICTED: Chrysemys picta bellii olfactory receptor 14A16    | 226 | Columba livia OR14           | 125 | 192 | 65% |
| XM 008175039.1 PREDICTED: Chrysemys picta bellii olfactory receptor 6F1      | 376 | Nestor notabilis OR6         | 206 | 303 | 68% |
| XM 008175031.1 PREDICTED: Chrysemys picta bellii olfactory receptor 6B1      | 201 | Picoides pubescens OR10      | 124 | 191 | 65% |
| XM 005309244.2 PREDICTED: Chrysemys picta bellii olfactory receptor 1468     | 199 | Melopsittacus undulatus OR10 | 129 | 195 | 66% |
| XM 008174413.1 PREDICTED: Chrysemys picta bellii olfactory receptor 14I1     | 188 | Nipponia nippon OR14         | 96  | 138 | 70% |
| XM 005289441.2 PREDICTED: Chrysemys picta bellii olfactory receptor 2AT4     | 372 | Nipponia nippon OR2          | 251 | 308 | 81% |
| XM 008175033.1 PREDICTED: Chrysemys picta bellii olfactory receptor 10A4     | 175 | Fulmarus glacialis OR10      | 123 | 174 | 71% |
| XM 005309234.1 PREDICTED: Chrysemys picta bellii olfactory receptor 6B1      | 169 | Fulmarus glacialis OR10      | 117 | 169 | 69% |
| XM 008175027.1 PREDICTED: Chrysemys picta bellii olfactory receptor 5        | 169 | Fulmarus glacialis OR10      | 118 | 169 | 70% |
| XM 005314359.1 PREDICTED: Chrysemys picta bellii olfactory receptor 52E4     | 108 | Phoenicopus ruber OR52       | 62  | 94  | 66% |
| XM 008178121.1 PREDICTED: Chrysemys picta bellii olfactory receptor 10I9     | 584 | Gavia stellata OR5           | 230 | 311 | 74% |
| XM 008174412.1 PREDICTED: Chrysemys picta bellii olfactory receptor 4D2      | 360 | Corvus brachyrhynchos OR5    | 217 | 307 | 71% |
| XM 008168738.1 PREDICTED: Chrysemys picta bellii olfactory receptor 14A16    | 356 | Columba livia OR14           | 206 | 307 | 67% |
| XM 005310841.1 PREDICTED: Chrysemys picta bellii olfactory receptor 5V1      | 356 | Egretta garzetta OR13        | 220 | 322 | 68% |
| XM 005310413.1 PREDICTED: Chrysemys picta bellii olfactory receptor 12D2     | 355 | Cariama cristata OR12        | 223 | 311 | 72% |
| XM 008168730.1 PREDICTED: Chrysemys picta bellii olfactory receptor 14A16    | 355 | Podiceps cristatus OR14      | 195 | 302 | 65% |
| XM 008178018.1 PREDICTED: Chrysemys picta bellii olfactory receptor 52K1     | 543 | Struthio camelus OR51        | 211 | 280 | 75% |
| XM 008175965.1 PREDICTED: Chrysemys picta bellii olfactory receptor 10O9     | 351 | Fulmarus glacialis OR8       | 177 | 270 | 66% |
| XM 005311801.1 PREDICTED: Chrysemys picta bellii olfactory receptor 51G2     | 538 | Tinamus guttatus OR51        | 222 | 301 | 74% |
| XM 008177963.1 PREDICTED: Chrysemys picta bellii olfactory receptor 10I9     | 348 | Balearica regulorum OR5      | 172 | 253 | 68% |
| XM 005312774.1 PREDICTED: Chrysemys picta bellii olfactory receptor 4N2      | 528 | Cathartes aura OR4           | 230 | 313 | 73% |
| XM 008175572.1 PREDICTED: Chrysemys picta bellii olfactory receptor 51G2     | 346 | Tyto alba OR51               | 174 | 253 | 69% |
| XM 005309056.2 PREDICTED: Chrysemys picta bellii olfactory receptor 6B1      | 345 | Phoenicopus ruber OR10       | 158 | 243 | 65% |
| XM 008177588.1 PREDICTED: Chrysemys picta bellii olfactory receptor 52B2     | 345 | Charadrius vociferus OR52    | 242 | 307 | 79% |
| XM 008175561.1 PREDICTED: Chrysemys picta bellii olfactory receptor 51G2     | 517 | Tinamus guttatus OR51        | 218 | 299 | 73% |
| XM 005313796.2 PREDICTED: Chrysemys picta bellii olfactory receptor 6C75     | 341 | Fulmarus glacialis OR6       | 208 | 311 | 67% |
| XM 008174336.1 PREDICTED: Chrysemys picta bellii olfactory receptor 6N1      | 339 | Fulmarus glacialis OR10      | 150 | 226 | 66% |
| XM 008174338.1 PREDICTED: Chrysemys picta bellii olfactory receptor 12D2     | 338 | Charadrius vociferus OR12    | 218 | 310 | 70% |

|                                                                           |     |                               |     |     |     |
|---------------------------------------------------------------------------|-----|-------------------------------|-----|-----|-----|
| XM 005310393.1 PREDICTED: Chrysemys picta bellii olfactory receptor 6N1   | 336 | Phaeton lepturus OR10         | 204 | 310 | 66% |
| XM 005310272.1 PREDICTED: Chrysemys picta bellii olfactory receptor 11A1  | 503 | Haliaeetus leucocephalus OR5  | 211 | 320 | 66% |
| XM 005310292.2 PREDICTED: Chrysemys picta bellii olfactory receptor 14A16 | 334 | Tinamus guttatus OR14         | 189 | 292 | 65% |
| XM 005310408.1 PREDICTED: Chrysemys picta bellii olfactory receptor 6B1   | 333 | Opisthocomus hoazin OR6       | 239 | 315 | 76% |
| XM 008171713.1 PREDICTED: Chrysemys picta bellii olfactory receptor 10I9  | 333 | Cathartes aura OR5            | 209 | 307 | 68% |
| XM 005310400.1 PREDICTED: Chrysemys picta bellii olfactory receptor 10C1  | 332 | Cathartes aura OR10           | 210 | 309 | 68% |
| XM 008177751.1 PREDICTED: Chrysemys picta bellii olfactory receptor 11A1  | 490 | Charadrius vociferus OR5      | 201 | 310 | 65% |
| XM 005309045.2 PREDICTED: Chrysemys picta bellii olfactory receptor 12    | 330 | Balearica regulorum OR5       | 222 | 306 | 73% |
| XM 008175036.1 PREDICTED: Chrysemys picta bellii olfactory receptor 6B1   | 330 | Fulmarus glacialis OR6        | 229 | 312 | 73% |
| XM 008176638.1 PREDICTED: Chrysemys picta bellii olfactory receptor 4Q2   | 487 | Nestor notabilis OR4          | 193 | 297 | 65% |
| XM 005309255.1 PREDICTED: Chrysemys picta bellii olfactory receptor 6F1   | 484 | Cathartes aura OR6            | 203 | 307 | 66% |
| XM 005310439.2 PREDICTED: Chrysemys picta bellii olfactory receptor 14A16 | 483 | Gavia stellata OR14           | 157 | 242 | 65% |
| XM 008174340.1 PREDICTED: Chrysemys picta bellii olfactory receptor 11A1  | 326 | Phoenicopterus ruber OR6      | 209 | 309 | 68% |
| XM 005290034.1 PREDICTED: Chrysemys picta bellii olfactory receptor 52B2  | 325 | Anas platyrhynchos OR52       | 272 | 323 | 84% |
| XM 005310406.1 PREDICTED: Chrysemys picta bellii olfactory receptor 10A7  | 324 | Pelecanus crispus OR10        | 206 | 303 | 68% |
| XM 005314585.2 PREDICTED: Chrysemys picta bellii olfactory receptor 14A16 | 324 | Columba livia OR14            | 195 | 290 | 67% |
| XM 005309064.1 PREDICTED: Chrysemys picta bellii olfactory receptor 10AG1 | 323 | Balearica regulorum OR14      | 198 | 305 | 65% |
| XM 005314320.1 PREDICTED: Chrysemys picta bellii olfactory receptor 11A1  | 323 | Fulmarus glacialis OR10       | 148 | 227 | 65% |
| XM 005311899.1 PREDICTED: Chrysemys picta bellii olfactory receptor 6N1   | 323 | Phoenicopterus ruber OR6      | 207 | 309 | 67% |
| XM 005290011.1 PREDICTED: Chrysemys picta bellii olfactory receptor 52B2  | 322 | Phaeton lepturus OR52         | 203 | 305 | 67% |
| XM 005309043.1 PREDICTED: Chrysemys picta bellii olfactory receptor 6P1   | 322 | Opisthocomus hoazin OR6       | 200 | 310 | 65% |
| XM 005309055.1 PREDICTED: Chrysemys picta bellii olfactory receptor 6B1   | 322 | Podiceps cristatus OR10       | 164 | 249 | 66% |
| XM 005310422.1 PREDICTED: Chrysemys picta bellii olfactory receptor 6N1   | 322 | Aptenodytes forsteri OR10     | 197 | 303 | 65% |
| XM 008174332.1 PREDICTED: Chrysemys picta bellii olfactory receptor 6B1   | 322 | Phoenicopterus ruber OR6      | 203 | 312 | 65% |
| XM 008177992.1 PREDICTED: Chrysemys picta bellii olfactory receptor 10A7  | 438 | Phoenicopterus ruber OR6      | 202 | 306 | 66% |
| XM 005309019.1 PREDICTED: Chrysemys picta bellii olfactory receptor 1020  | 321 | Aptenodytes forsteri OR5      | 224 | 314 | 71% |
| XM 005313885.1 PREDICTED: Chrysemys picta bellii olfactory receptor 52K2  | 321 | Cathartes aura OR52           | 233 | 316 | 74% |
| XM 005310280.2 PREDICTED: Chrysemys picta bellii olfactory receptor 6F1   | 320 | Mesitornis unicolor OR6       | 229 | 304 | 75% |
| XM 008174321.1 PREDICTED: Chrysemys picta bellii olfactory receptor 6N1   | 320 | Phoenicopterus ruber OR10     | 160 | 246 | 65% |
| XM 005309024.1 PREDICTED: Chrysemys picta bellii olfactory receptor 10C1  | 319 | Gavia stellata OR10           | 242 | 310 | 78% |
| XM 005311817.2 PREDICTED: Chrysemys picta bellii olfactory receptor 51G2  | 319 | Struthio camelus OR51         | 235 | 295 | 80% |
| XM 005312282.1 PREDICTED: Chrysemys picta bellii olfactory receptor 5V1   | 317 | Charadrius vociferus OR5      | 235 | 316 | 74% |
| XM 005290052.1 PREDICTED: Chrysemys picta bellii olfactory receptor 51G2  | 316 | Tinamus guttatus OR51         | 215 | 308 | 70% |
| XM 005313248.1 PREDICTED: Chrysemys picta bellii olfactory receptor 52R1  | 316 | Gavia stellata OR52           | 224 | 307 | 73% |
| XM 008178061.1 PREDICTED: Chrysemys picta bellii olfactory receptor 52P1  | 628 | Haliaeetus leucocephalus OR52 | 215 | 316 | 68% |
| XM 005314254.1 PREDICTED: Chrysemys picta bellii olfactory receptor 11A1  | 316 | Aptenodytes forsteri OR10     | 206 | 317 | 65% |
| XM 008174690.1 PREDICTED: Chrysemys picta bellii olfactory receptor 11A1  | 316 | Cuculus canorus OR5           | 203 | 310 | 65% |
| XM 005310270.2 PREDICTED: Chrysemys picta bellii olfactory receptor 6N1   | 418 | Charadrius vociferus OR5      | 200 | 310 | 65% |

|                                                                          |     |                                         |     |     |     |
|--------------------------------------------------------------------------|-----|-----------------------------------------|-----|-----|-----|
| XM 005309010.1 PREDICTED: Chrysemys picta bellii olfactory receptor 10A4 | 315 | Tinamus guttatus OR10                   | 195 | 301 | 65% |
| XM 005313793.1 PREDICTED: Chrysemys picta bellii olfactory receptor 6C4  | 315 | Charadrius vociferus OR6                | 194 | 300 | 65% |
| XM 005284256.1 PREDICTED: Chrysemys picta bellii olfactory receptor 6B1  | 417 | Phoenicopterus ruber OR6                | 203 | 306 | 66% |
| XM 008177186.1 PREDICTED: Chrysemys picta bellii olfactory receptor 6N1  | 414 | Melopsittacus undulatus OR10            | 206 | 319 | 65% |
| XM 005290036.2 PREDICTED: Chrysemys picta bellii olfactory receptor 52B2 | 313 | Struthio camelus OR52                   | 222 | 310 | 72% |
| XM 008177901.1 PREDICTED: Chrysemys picta bellii olfactory receptor 51E2 | 313 | Phaeton lepturus OR51                   | 230 | 300 | 77% |
| XM 005309014.1 PREDICTED: Chrysemys picta bellii olfactory receptor 10A4 | 312 | Chaetura pelagica OR10                  | 214 | 309 | 69% |
| XM 005310433.1 PREDICTED: Chrysemys picta bellii olfactory receptor 5V1  | 312 | Phoenicopterus ruber OR13               | 209 | 308 | 68% |
| XM 005312401.1 PREDICTED: Chrysemys picta bellii olfactory receptor 6F1  | 309 | Tinamus guttatus OR6                    | 195 | 302 | 65% |
| XM 008174396.1 PREDICTED: Chrysemys picta bellii olfactory receptor 4M1  | 309 | Pelecanus crispus OR4                   | 199 | 308 | 65% |
| XM 005311794.2 PREDICTED: Chrysemys picta bellii olfactory receptor 51G2 | 391 | Tinamus guttatus OR51                   | 211 | 299 | 71% |
| XM 005310423.1 PREDICTED: Chrysemys picta bellii olfactory receptor 6N1  | 305 | Fulmarus glacialis OR10                 | 145 | 203 | 71% |
| XM 008174324.1 PREDICTED: Chrysemys picta bellii olfactory receptor 476  | 303 | Fulmarus glacialis OR10                 | 120 | 184 | 65% |
| XM 008177669.1 PREDICTED: Chrysemys picta bellii olfactory receptor 52B6 | 303 | Pelecanus crispus OR52                  | 195 | 302 | 65% |
| XM 008174403.1 PREDICTED: Chrysemys picta bellii olfactory receptor 4D9  | 387 | Geospiza fortis OR4                     | 203 | 289 | 70% |
| XM 008177073.1 PREDICTED: Chrysemys picta bellii olfactory receptor 11A1 | 287 | Charadrius vociferus OR5                | 184 | 272 | 68% |
| XM 005309054.2 PREDICTED: Chrysemys picta bellii olfactory receptor 1038 | 281 | Picoides pubescens OR10                 | 160 | 236 | 68% |
| XM 005309062.1 PREDICTED: Chrysemys picta bellii olfactory receptor 11L1 | 281 | Melopsittacus undulatus OR10            | 170 | 256 | 66% |
| XM 008177845.1 PREDICTED: Chrysemys picta bellii olfactory receptor 52K1 | 270 | Struthio camelus OR51                   | 146 | 211 | 69% |
| XM 005309038.2 PREDICTED: Chrysemys picta bellii olfactory receptor 6B1  | 379 | Fulmarus glacialis OR10                 | 146 | 226 | 65% |
| XM 005310284.2 PREDICTED: Chrysemys picta bellii olfactory receptor 1038 | 245 | Charadrius vociferus OR5                | 129 | 196 | 66% |
| Pm066                                                                    | 349 | Cathartes aura OR4                      | 210 | 298 | 70% |
| Pm091                                                                    | 343 | Opisthocomus hoazin OR6                 | 242 | 310 | 78% |
| Pm010                                                                    | 334 | Charadrius vociferus OR4                | 240 | 306 | 78% |
| Pm120                                                                    | 333 | Struthio camelus OR51                   | 226 | 303 | 75% |
| Pm047                                                                    | 331 | Tinamus guttatus OR5                    | 212 | 309 | 69% |
| Pm068                                                                    | 331 | Podiceps cristatus OR2                  | 209 | 318 | 66% |
| Pm020                                                                    | 328 | Cuculus canorus OR5                     | 201 | 310 | 65% |
| Pm046                                                                    | 328 | Fulmarus glacialis OR10                 | 227 | 311 | 73% |
| Pm055                                                                    | 328 | Struthio camelus OR6                    | 213 | 297 | 72% |
| Pm136                                                                    | 324 | Antrostomus carolinensis OR9 Pseudogene | 142 | 215 | 66% |
| Pm045                                                                    | 322 | Struthio camelus OR5                    | 197 | 303 | 65% |
| Pm148                                                                    | 322 | Opisthocomus hoazin OR52                | 228 | 301 | 76% |
| Pm070                                                                    | 320 | Tinamus guttatus OR52                   | 221 | 303 | 73% |
| Pm119                                                                    | 318 | Falco peregrinus OR52                   | 251 | 314 | 80% |
| Pm014                                                                    | 316 | Tinamus guttatus OR5                    | 207 | 312 | 66% |
| Pm053                                                                    | 316 | Struthio camelus OR5                    | 205 | 308 | 67% |
| Pm030                                                                    | 314 | Cariama cristata OR12                   | 208 | 314 | 66% |

|         |     |                                          |     |     |     |
|---------|-----|------------------------------------------|-----|-----|-----|
| Pm036   | 314 | Anas platyrhynchos OR4 Pseudogene        | 127 | 190 | 67% |
| Pm049   | 314 | Falco peregrinus OR4                     | 206 | 309 | 67% |
| Pm088   | 313 | Antrostomus carolinensis OR11            | 207 | 313 | 66% |
| Pm115   | 313 | Cathartes aura OR4                       | 199 | 305 | 65% |
| Pm005   | 310 | Pterocles gutturalis OR5                 | 219 | 302 | 73% |
| Pm132   | 310 | Gallus gallus OR5                        | 215 | 309 | 70% |
| Pm057   | 309 | Balearica regulorum OR5                  | 205 | 305 | 67% |
| Pm123   | 308 | Tyto alba OR9                            | 215 | 297 | 72% |
| Pm004   | 300 | Phoenicopus ruber OR5                    | 194 | 300 | 65% |
| Pm096   | 296 | Fulmarus glacialis OR6                   | 207 | 271 | 76% |
| Pm023   | 385 | Struthio camelus OR4                     | 226 | 301 | 75% |
| Pm054   | 280 | Struthio camelus OR6                     | 222 | 269 | 83% |
| Pm155 P | 196 | Gavia stellata OR10                      | 93  | 142 | 65% |
| Pm171 T | 226 | Struthio camelus OR4                     | 142 | 212 | 67% |
| Pm207 T | 209 | Opisthocomus hoazin OR6                  | 142 | 195 | 73% |
| Pm213 T | 207 | Fulmarus glacialis OR6                   | 133 | 193 | 69% |
| Pm223 T | 199 | Fulmarus glacialis OR4                   | 136 | 197 | 69% |
| Pm222 T | 198 | Antrostomus carolinensis OR12 Pseudogene | 128 | 185 | 69% |
| Pm209 T | 195 | Gallus gallus OR5                        | 125 | 189 | 66% |
| Pm248 T | 194 | Struthio camelus OR2                     | 130 | 186 | 70% |
| Pm250 T | 190 | Anas platyrhynchos OR12                  | 129 | 190 | 68% |
| Pm271 T | 180 | Gavia stellata OR10                      | 134 | 180 | 74% |
| Pm275 T | 179 | Fulmarus glacialis OR10                  | 103 | 159 | 65% |
| Pm277 T | 174 | Cariama cristata OR12                    | 106 | 159 | 67% |
| Pm184 T | 169 | Fulmarus glacialis OR2                   | 110 | 169 | 65% |
| Pm195 T | 155 | Phoenicopus ruber OR10                   | 63  | 97  | 65% |
| Pm188 T | 148 | Nestor notabilis OR5                     | 101 | 145 | 70% |
| Pm243 T | 144 | Aptenodytes forsteri OR5                 | 96  | 142 | 68% |
| Pm219 T | 141 | Cathartes aura OR10                      | 82  | 126 | 65% |
| Pm279 T | 141 | Opisthocomus hoazin OR9                  | 85  | 131 | 65% |
| Pm178 T | 140 | Nestor notabilis OR5                     | 93  | 140 | 66% |
| Pm252 T | 132 | Antrostomus carolinensis OR12 Pseudogene | 91  | 132 | 69% |
| Pm204 T | 261 | Nestor notabilis OR6                     | 177 | 260 | 68% |
| Ac93    | 331 | Podiceps cristatus OR10                  | 225 | 322 | 70% |
| Ac89    | 324 | Struthio camelus OR6                     | 235 | 319 | 74% |
| Ac75    | 323 | Pterocles gutturalis OR6                 | 205 | 310 | 66% |
| Ac109   | 323 | Tinamus guttatus OR13                    | 198 | 303 | 65% |
| Ac110   | 314 | Tinamus guttatus OR5                     | 164 | 237 | 69% |

|                                                      |     |                                    |     |     |     |
|------------------------------------------------------|-----|------------------------------------|-----|-----|-----|
| Ac52                                                 | 314 | <i>Pterocles gutturalis</i> OR4    | 201 | 306 | 66% |
| Ac98                                                 | 314 | <i>Podiceps cristatus</i> OR10     | 163 | 248 | 66% |
| Ac106                                                | 314 | <i>Struthio camelus</i> OR4        | 224 | 301 | 74% |
| Ac131                                                | 314 | <i>Cariama cristata</i> OR9        | 124 | 170 | 73% |
| Ac59                                                 | 313 | <i>Struthio camelus</i> OR6        | 201 | 305 | 66% |
| Ac3                                                  | 312 | <i>Tinamus guttatus</i> OR5        | 204 | 306 | 67% |
| Ac91                                                 | 312 | <i>Struthio camelus</i> OR6        | 231 | 304 | 76% |
| Ac125                                                | 312 | <i>Fulmarus glacialis</i> OR10     | 148 | 226 | 65% |
| Ac112                                                | 312 | <i>Phaeton lepturus</i> OR5        | 118 | 179 | 66% |
| Ac119                                                | 312 | <i>Cariama cristata</i> OR12       | 120 | 186 | 65% |
| Ac44                                                 | 311 | <i>Phaeton lepturus</i> OR6        | 215 | 311 | 69% |
| Ac103                                                | 311 | <i>Balearica regulorum</i> OR6     | 205 | 308 | 67% |
| Ac27                                                 | 310 | <i>Cathartes aura</i> OR4          | 205 | 298 | 69% |
| Ac20                                                 | 309 | <i>Tinamus guttatus</i> OR5        | 198 | 305 | 65% |
| Ac37                                                 | 307 | <i>Phoenicopus ruber</i> OR13      | 198 | 305 | 65% |
| Ac87                                                 | 307 | <i>Opisthocomus hoazin</i> OR6     | 231 | 305 | 76% |
| Ac81                                                 | 306 | <i>Calypte anna</i> OR10           | 197 | 302 | 65% |
| Alligator mississippiensis predicted OR4             | 240 | <i>Phoenicopus ruber</i> OR4       | 102 | 156 | 65% |
| Alligator mississippiensis predicted OR10            | 225 | <i>Charadrius vociferus</i> OR10   | 174 | 219 | 79% |
| Alligator mississippiensis predicted OR51 PSEUDOGENE | 212 | <i>Tinamus guttatus</i> OR51       | 76  | 114 | 67% |
| Alligator mississippiensis predicted OR13 PSEUDOGENE | 201 | <i>Pelecanus crispus</i> OR13      | 130 | 198 | 66% |
| Alligator mississippiensis predicted OR6 PSEUDOGENE  | 197 | <i>Columba livia</i> OR6           | 98  | 131 | 75% |
| Alligator mississippiensis predicted OR12 PSEUDOGENE | 77  | <i>Podiceps cristatus</i> OR12     | 53  | 76  | 70% |
| Alligator mississippiensis predicted OR10 PSEUDOGENE | 94  | <i>Haliaeetus leucophalus</i> OR12 | 59  | 91  | 65% |
| Alligator mississippiensis predicted OR10 PSEUDOGENE | 35  | <i>Podiceps cristatus</i> OR10     | 23  | 34  | 68% |
| Alligator mississippiensis predicted OR6 PSEUDOGENE  | 144 | <i>Cathartes aura</i> OR5          | 71  | 110 | 65% |
| Alligator mississippiensis predicted OR2 PSEUDOGENE  | 109 | <i>Gavia stellata</i> OR10         | 68  | 105 | 65% |
| Alligator mississippiensis predicted OR2 PSEUDOGENE  | 83  | <i>Phoenicopus ruber</i> OR13      | 56  | 82  | 68% |
| Alligator mississippiensis predicted OR10 PSEUDOGENE | 122 | <i>Phaeton lepturus</i> OR13       | 79  | 117 | 68% |
| Alligator mississippiensis predicted OR2 PSEUDOGENE  | 28  | <i>Anas platyrhynchos</i> OR12     | 20  | 28  | 71% |
| Alligator mississippiensis predicted OR11 PSEUDOGENE | 53  | <i>Picoides pubescens</i> OR10     | 35  | 53  | 66% |
| Alligator mississippiensis predicted OR9 PSEUDOGENE  | 103 | <i>Pygoscelis adeliae</i> OR10     | 71  | 102 | 70% |
| Alligator mississippiensis predicted OR2 PSEUDOGENE  | 43  | <i>Struthio camelus</i> OR6        | 20  | 31  | 65% |
| Alligator mississippiensis predicted OR5 PSEUDOGENE  | 50  | <i>Phaeton lepturus</i> OR10       | 29  | 44  | 66% |
| Alligator mississippiensis predicted OR12 PSEUDOGENE | 97  | <i>Cariama cristata</i> OR12       | 63  | 95  | 66% |
| Alligator mississippiensis predicted OR5 PSEUDOGENE  | 97  | <i>Phoenicopus ruber</i> OR6       | 61  | 89  | 69% |
| Alligator mississippiensis predicted OR8 PSEUDOGENE  | 52  | <i>Anas platyrhynchos</i> OR5      | 38  | 52  | 73% |
| Alligator mississippiensis predicted OR10 PSEUDOGENE | 77  | <i>Fulmarus glacialis</i> OR5      | 44  | 66  | 67% |

|                                                      |     |                                         |     |     |     |
|------------------------------------------------------|-----|-----------------------------------------|-----|-----|-----|
| Alligator mississippiensis predicted OR10 PSEUDOGENE | 40  | Aptenodytes forsteri OR5 Pseudogene     | 15  | 22  | 68% |
| Alligator mississippiensis predicted OR13 PSEUDOGENE | 73  | Phoenicopterus ruber OR10 Pseudogene    | 32  | 48  | 67% |
| Alligator mississippiensis predicted OR10 PSEUDOGENE | 71  | Charadrius vociferus OR10               | 29  | 40  | 73% |
| Alligator mississippiensis predicted OR12 PSEUDOGENE | 70  | Manacus vitellinus OR12                 | 43  | 66  | 65% |
| Alligator mississippiensis predicted OR12 PSEUDOGENE | 53  | Anas platyrhynchos OR12                 | 36  | 52  | 69% |
| Alligator mississippiensis predicted OR2 PSEUDOGENE  | 69  | Nipponia nippon OR5                     | 42  | 61  | 69% |
| Alligator mississippiensis predicted OR13 PSEUDOGENE | 65  | Phoenicopterus ruber OR13               | 31  | 47  | 66% |
| Alligator mississippiensis predicted OR13 PSEUDOGENE | 60  | Gavia stellata OR8 Pseudogene           | 42  | 60  | 70% |
| Alligator mississippiensis predicted OR13 PSEUDOGENE | 35  | Aptenodytes forsteri OR6 Pseudogene     | 26  | 35  | 74% |
| Alligator mississippiensis predicted OR2 PSEUDOGENE  | 64  | Antrostomus carolinensis OR2 Pseudogene | 28  | 39  | 72% |
| Alligator mississippiensis predicted OR10 PSEUDOGENE | 64  | Phoenicopterus ruber OR10               | 29  | 43  | 67% |
| Alligator mississippiensis predicted OR14 PSEUDOGENE | 63  | Egretta garzetta OR14                   | 40  | 59  | 68% |
| Alligator mississippiensis predicted OR12 PSEUDOGENE | 62  | Struthio camelus OR2                    | 41  | 61  | 67% |
| Alligator mississippiensis predicted OR10            | 361 | Fulmarus glacialis OR10                 | 148 | 227 | 65% |
| Alligator mississippiensis predicted OR13 PSEUDOGENE | 57  | Struthio camelus OR5                    | 33  | 50  | 66% |
| Alligator mississippiensis predicted OR1 PSEUDOGENE  | 50  | Haliaeetus albicilla OR12 Pseudogene    | 31  | 47  | 66% |
| Alligator mississippiensis predicted OR1 PSEUDOGENE  | 40  | Struthio camelus OR5                    | 26  | 40  | 65% |
| Alligator mississippiensis predicted OR10 PSEUDOGENE | 45  | Gavia stellata OR8 Pseudogene           | 26  | 36  | 72% |
| Alligator mississippiensis predicted OR5 PSEUDOGENE  | 37  | Fulmarus glacialis OR8                  | 24  | 36  | 67% |
| Alligator mississippiensis predicted OR14 PSEUDOGENE | 36  | Balearica regulorum OR14                | 23  | 35  | 66% |
| Alligator mississippiensis predicted OR6 PSEUDOGENE  | 28  | Phoenicopterus ruber OR13               | 19  | 28  | 68% |
| Alligator mississippiensis predicted OR51            | 350 | Struthio camelus OR51                   | 245 | 317 | 77% |
| Alligator mississippiensis predicted OR10            | 344 | Fulmarus glacialis OR10                 | 153 | 226 | 68% |
| Alligator mississippiensis predicted OR10            | 343 | Phoenicopterus ruber OR10               | 209 | 294 | 71% |
| Alligator mississippiensis predicted OR55            | 332 | Struthio camelus OR55                   | 195 | 285 | 68% |
| Alligator mississippiensis predicted OR52            | 331 | Cathartes aura OR52                     | 235 | 310 | 76% |
| Alligator mississippiensis predicted OR6             | 331 | Podiceps cristatus OR10                 | 164 | 250 | 66% |
| Alligator mississippiensis predicted OR10            | 328 | Aptenodytes forsteri OR5                | 216 | 323 | 67% |
| Alligator mississippiensis predicted OR6             | 326 | Struthio camelus OR6                    | 257 | 313 | 82% |
| Alligator mississippiensis predicted OR10            | 325 | Phoenicopterus ruber OR10               | 160 | 246 | 65% |
| Alligator mississippiensis predicted OR10            | 321 | Fulmarus glacialis OR10                 | 147 | 226 | 65% |
| Alligator mississippiensis predicted OR52            | 321 | Merops nubicus OR52                     | 210 | 303 | 69% |
| Alligator mississippiensis predicted OR5             | 321 | Aptenodytes forsteri OR10               | 201 | 310 | 65% |
| Alligator mississippiensis predicted OR6             | 320 | Opisthocomus hoazin OR6                 | 241 | 303 | 80% |
| Alligator mississippiensis predicted OR10            | 320 | Charadrius vociferus OR10               | 218 | 319 | 68% |
| Alligator mississippiensis predicted OR5             | 319 | Phoenicopterus ruber OR5                | 221 | 311 | 71% |
| Alligator mississippiensis predicted OR6             | 319 | Anas platyrhynchos OR6                  | 224 | 312 | 72% |
| Alligator mississippiensis predicted OR10            | 317 | Pelecanus crispus OR10                  | 220 | 308 | 71% |

|                                           |     |                              |     |     |     |
|-------------------------------------------|-----|------------------------------|-----|-----|-----|
| Alligator mississippiensis predicted OR10 | 317 | Balearica regulorum OR10     | 219 | 317 | 69% |
| Alligator mississippiensis predicted OR52 | 317 | Tinamus guttatus OR52        | 231 | 310 | 75% |
| Alligator mississippiensis predicted OR52 | 317 | Cariama cristata OR52        | 251 | 314 | 80% |
| Alligator mississippiensis predicted OR10 | 316 | Fulmarus glacialis OR10      | 209 | 300 | 70% |
| Alligator mississippiensis predicted OR6  | 316 | Columba livia OR6            | 231 | 311 | 74% |
| Alligator mississippiensis predicted OR6  | 316 | Struthio camelus OR6         | 252 | 310 | 81% |
| Alligator mississippiensis predicted OR5  | 315 | Charadrius vociferus OR5     | 231 | 313 | 74% |
| Alligator mississippiensis predicted OR52 | 315 | Struthio camelus OR52        | 225 | 313 | 72% |
| Alligator mississippiensis predicted OR10 | 315 | Tinamus guttatus OR10        | 204 | 301 | 68% |
| Alligator mississippiensis predicted OR4  | 315 | Pterocles gutturalis OR4     | 231 | 306 | 75% |
| Alligator mississippiensis predicted OR6  | 315 | Nipponia nippon OR6          | 200 | 310 | 65% |
| Alligator mississippiensis predicted OR5  | 314 | Phaeton lepturus OR5         | 205 | 308 | 67% |
| Alligator mississippiensis predicted OR12 | 314 | Cariama cristata OR12        | 223 | 309 | 72% |
| Alligator mississippiensis predicted OR5  | 314 | Struthio camelus OR5         | 219 | 308 | 71% |
| Alligator mississippiensis predicted OR5  | 313 | Fulmarus glacialis OR5       | 226 | 307 | 74% |
| Alligator mississippiensis predicted OR5  | 313 | Tinamus guttatus OR5         | 244 | 313 | 78% |
| Alligator mississippiensis predicted OR10 | 313 | Aptenodytes forsteri OR10    | 192 | 284 | 68% |
| Alligator mississippiensis predicted OR10 | 313 | Tinamus guttatus OR10        | 203 | 275 | 74% |
| Alligator mississippiensis predicted OR2  | 313 | Nipponia nippon OR2          | 213 | 313 | 68% |
| Alligator mississippiensis predicted OR5  | 311 | Haliaeetus leucocephalus OR5 | 211 | 306 | 69% |
| Alligator mississippiensis predicted OR11 | 311 | Struthio camelus OR6         | 218 | 310 | 70% |
| Alligator mississippiensis predicted OR14 | 310 | Egretta garzetta OR14        | 173 | 268 | 65% |
| Alligator mississippiensis predicted OR10 | 301 | Anas platyrhynchos OR2       | 207 | 295 | 70% |
| Alligator mississippiensis predicted OR2  | 301 | Charadrius vociferus OR2     | 213 | 300 | 71% |
| Alligator mississippiensis predicted OR6  | 298 | Taeniopygia guttata OR2      | 190 | 262 | 73% |
| Alligator mississippiensis predicted OR10 | 381 | Anas platyrhynchos OR10      | 203 | 286 | 71% |
| Alligator mississippiensis predicted OR8  | 265 | Phoenicopus ruber OR13       | 131 | 200 | 66% |
| Alligator mississippiensis predicted OR4  | 250 | Podiceps cristatus OR4       | 115 | 163 | 71% |



**Supplementary Table S9.** OR genes showing at least 65% shared identity between reptiles and birds were considered present in extinct dinosaur taxa. Shared ORs that have had their odorant ligand de-orphaned in humans and mice, as well as their human odorant ‘descriptions’, are displayed.

| Receptor 65% identity between reptiles and birds | Ligands                           | Odor                                   | PubChem CID | Ref     |
|--------------------------------------------------|-----------------------------------|----------------------------------------|-------------|---------|
| OR51E2                                           | Propanoic acid                    | Sharp, rancid                          | 1032        | [10]    |
| OR51L1                                           | Hexanoic acid                     | Goat-like, Barn-yard animal            | 8892        |         |
|                                                  | Allyl phenylacetate               | -                                      |             |         |
| OR51G2                                           | Vanillic acid                     | Pleasant, creamy                       | 8468        | [10]    |
| OR51Q1                                           | Heptanoic acid                    | Rancid                                 | 8094        |         |
| OR52B2                                           | Heptanoic acid                    | Rancid                                 | 8094        |         |
|                                                  | Pentanal                          | Strong, acrid, pungent                 | 8063        |         |
|                                                  | Pentanoic acid                    | Very unpleasant                        | 7991        |         |
|                                                  | 3-Methylbutanoic acid             | Disagreeable, rancid-cheese            |             |         |
| OR52E4                                           | Octanoic acid                     | Fruity, unpleasant, irritating         | 379         |         |
|                                                  | Nonanoic acid                     | Fatty, coconut                         | 8158        |         |
|                                                  | Decanoic acid                     | Unpleasant, rancid                     | 2969        |         |
| OR52D1                                           | Octanoic acid, methyl ester       | Powerful, fruity                       | 8091        |         |
|                                                  | Heptanoic acid                    | Rancid                                 | 8094        | [11]    |
|                                                  | Octanoic acid                     | Fruity, unpleasant, irritating         | 379         | [10]    |
| OR52R1                                           | Decanoic acid                     | Unpleasant, rancid                     | 2969        |         |
|                                                  | Nonanoic acid                     | Fatty, coconut                         | 8158        |         |
| OR2A5                                            | Nonanoic acid                     | Fatty, coconut                         | 8158        | [10]    |
|                                                  | 1-Octanol                         | Orange rose                            | 957         | [10,11] |
|                                                  | 1-Nonanol                         | Floral                                 | 8914        | [10]    |
|                                                  | 1-Decanol                         | Sweet, floral, fruity                  | 8174        |         |
|                                                  | 1-Heptanol                        | Fragrant                               | 8129        |         |
| OR4E2                                            | (Methylthio)-methanethiol         | -                                      | 122370      | [10]    |
|                                                  | (Methylthio)-ethanthiol           | -                                      | 525462      |         |
|                                                  | Bis(Methyl-thiomethyl) disulphide | -                                      | 158825      |         |
| OR5AR1 (Olf1019)                                 | Prenyl acetate                    | Fruity, floral                         | 14489       |         |
|                                                  | R-limonene                        | Fruity                                 | 440917      |         |
| OR6A2                                            | Heptanal                          | Fatty, pungent, fruity, metallic blood | 8130        | [10,12] |
| OR6N1                                            | Allyl benzene                     | -                                      | 9309        | [10]    |
| OR6P1                                            | Eugenol                           | Spicy, floral                          | 3314        |         |
| OR6X1                                            | (-)-Carvone                       | -                                      | 16724       |         |
| OR10A3                                           | 1-Nonanethiol                     | Unpleasant                             | 15077       |         |
|                                                  | 1-Octanol                         | Orange rose                            | 957         | [10,11] |
| OR11A1                                           | 2-Ethyl fenchol                   | Earthy                                 | 106997      | [10]    |
| OR11L1                                           | (+)-Camphor                       | Fragrant, penetrating                  | 159055      |         |
|                                                  | (-)-Camphor                       | Fragrant, penetrating                  | 444294      |         |
|                                                  | (-)-Fenchone                      | Similar to camphor                     | 82229       |         |
| OR12D3                                           | (+)-Carvone                       | -                                      | 16724       |         |
| Olf1545                                          | Nonanedioic acid                  | -                                      | 2266        |         |

## Supplementary figure legends

**Supplementary Figure S1.** Boxplot of olfactory bulb (OB) ratios with respect to a piscivorous, insectivorous, omnivorous, herbivorous and carnivorous dietary niches. Data represents taxa with known diet data (n = 74). Median values (black) and mean values (red) are displayed.

**Supplementary Figure S2.** Body mass vs. OB ratio. The body mass (Kg) and olfactory bulb (OB) ratio for 74 taxa, combining non-avian dinosaurs, crown-clade Aves and stem birds, shows a strong linear relationship, possibly driven by larger theropods (tyrannosaurs labeled in red).

**Supplementary Figure S3.** Body mass (Kg) vs. size of the olfactory receptor repertoire observed in modern birds. There is no significant correlation between the two variables.

**Supplementary Figure S4.** Ancestral olfactory bulb ratios estimated using maximum likelihood, with only extant taxa and outliers (*Gallus gallus*, *Taeniopygia guttata* and *Melopsittacus undulatus*) included. Node numbers correspond to Supplemental Table S3.

**Supplementary Figure S5.** Ancestral olfactory bulb ratios estimated using maximum likelihood, with only extant taxa and outliers (*Gallus gallus*, *Taeniopygia guttata* and *Melopsittacus undulatus*) excluded. Node numbers correspond to Supplemental Table S4.

**Supplementary Figure S6.** Grafen length phylogeny with ancestral olfactory bulb ratios estimated using maximum likelihood. Branches show an increase (red) or decrease (blue) in OB ratio relative to the most recent common ancestor. Node labels correspond to Supplementary Table S5.

**Supplementary Figure S7.** Grafen phylogeny with ancestral olfactory bulb ratios estimated using phylogenetic independent contrasts (PICs). Branches show increases (red) or decreases (blue) in OB ratio relative to a most recent common ancestor. Node labels correspond to Supplementary Table S5.

**Supplementary Figure S8.** Grafen length phylogeny with ancestral olfactory bulb ratios estimated using generalized least squares (GLS). Branches show an increase (red) or decrease (blue) in OB ratio relative to the most recent common ancestor. Node labels correspond to Supplementary Table S5.

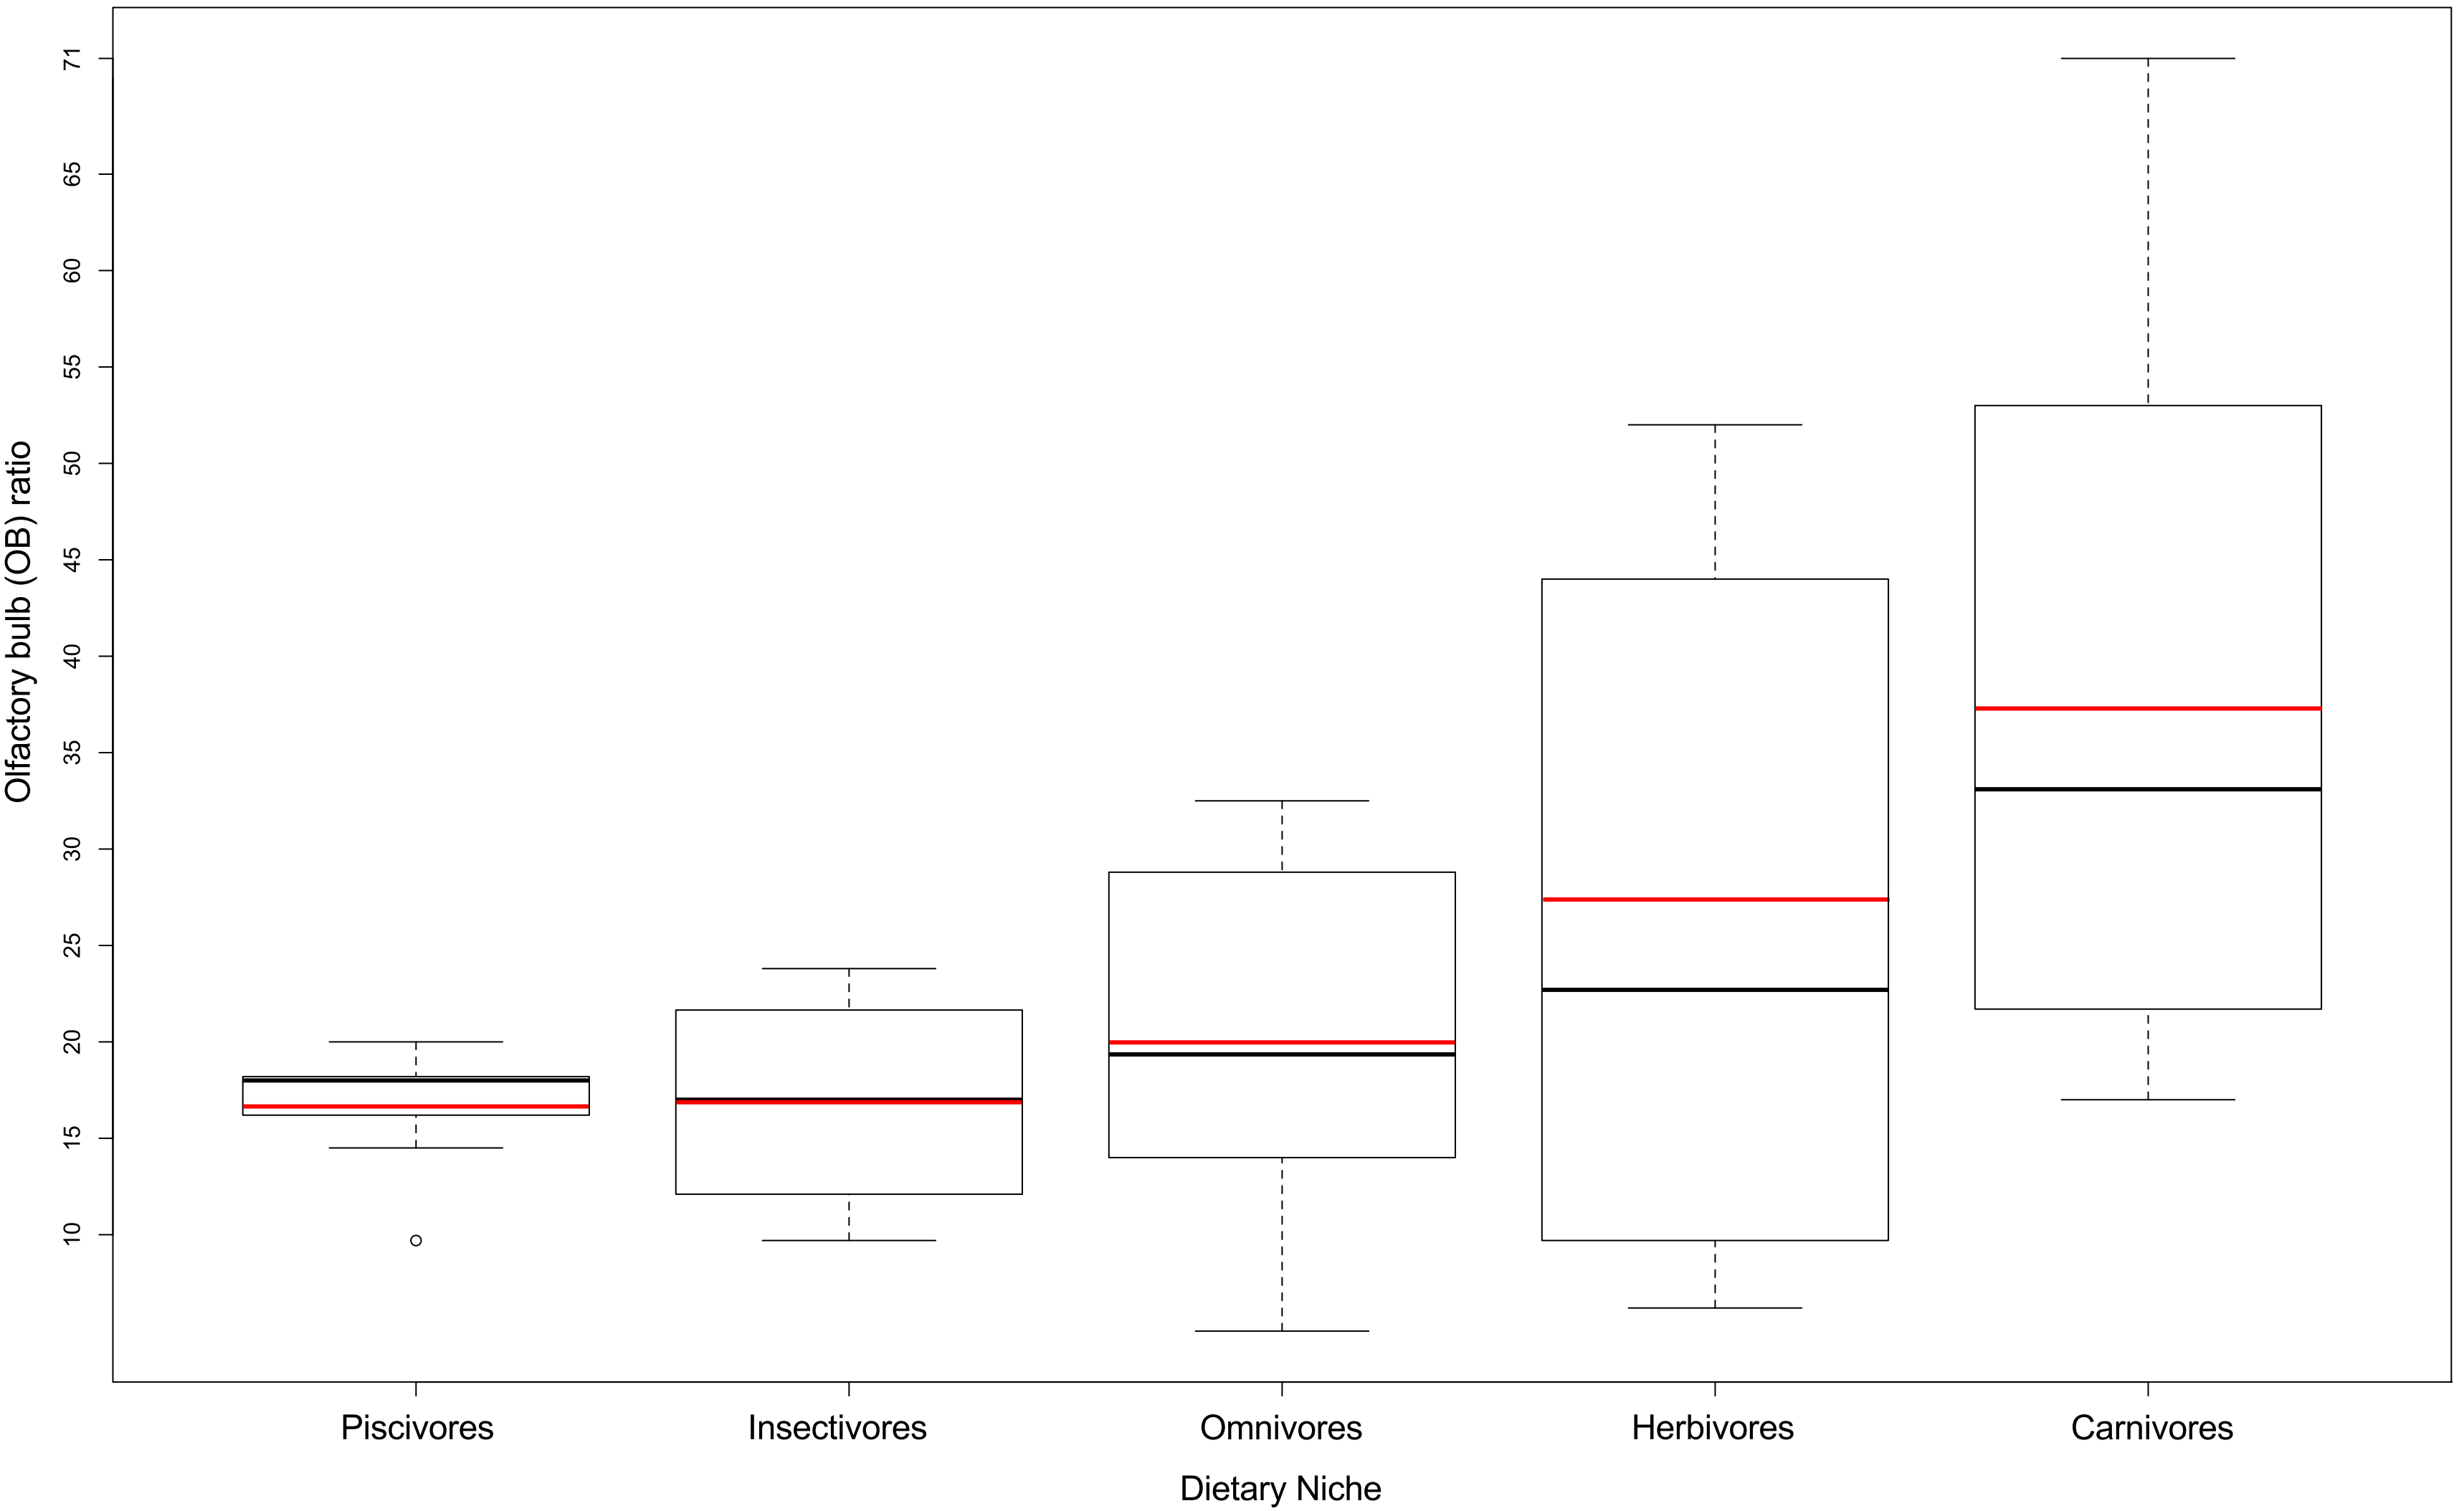

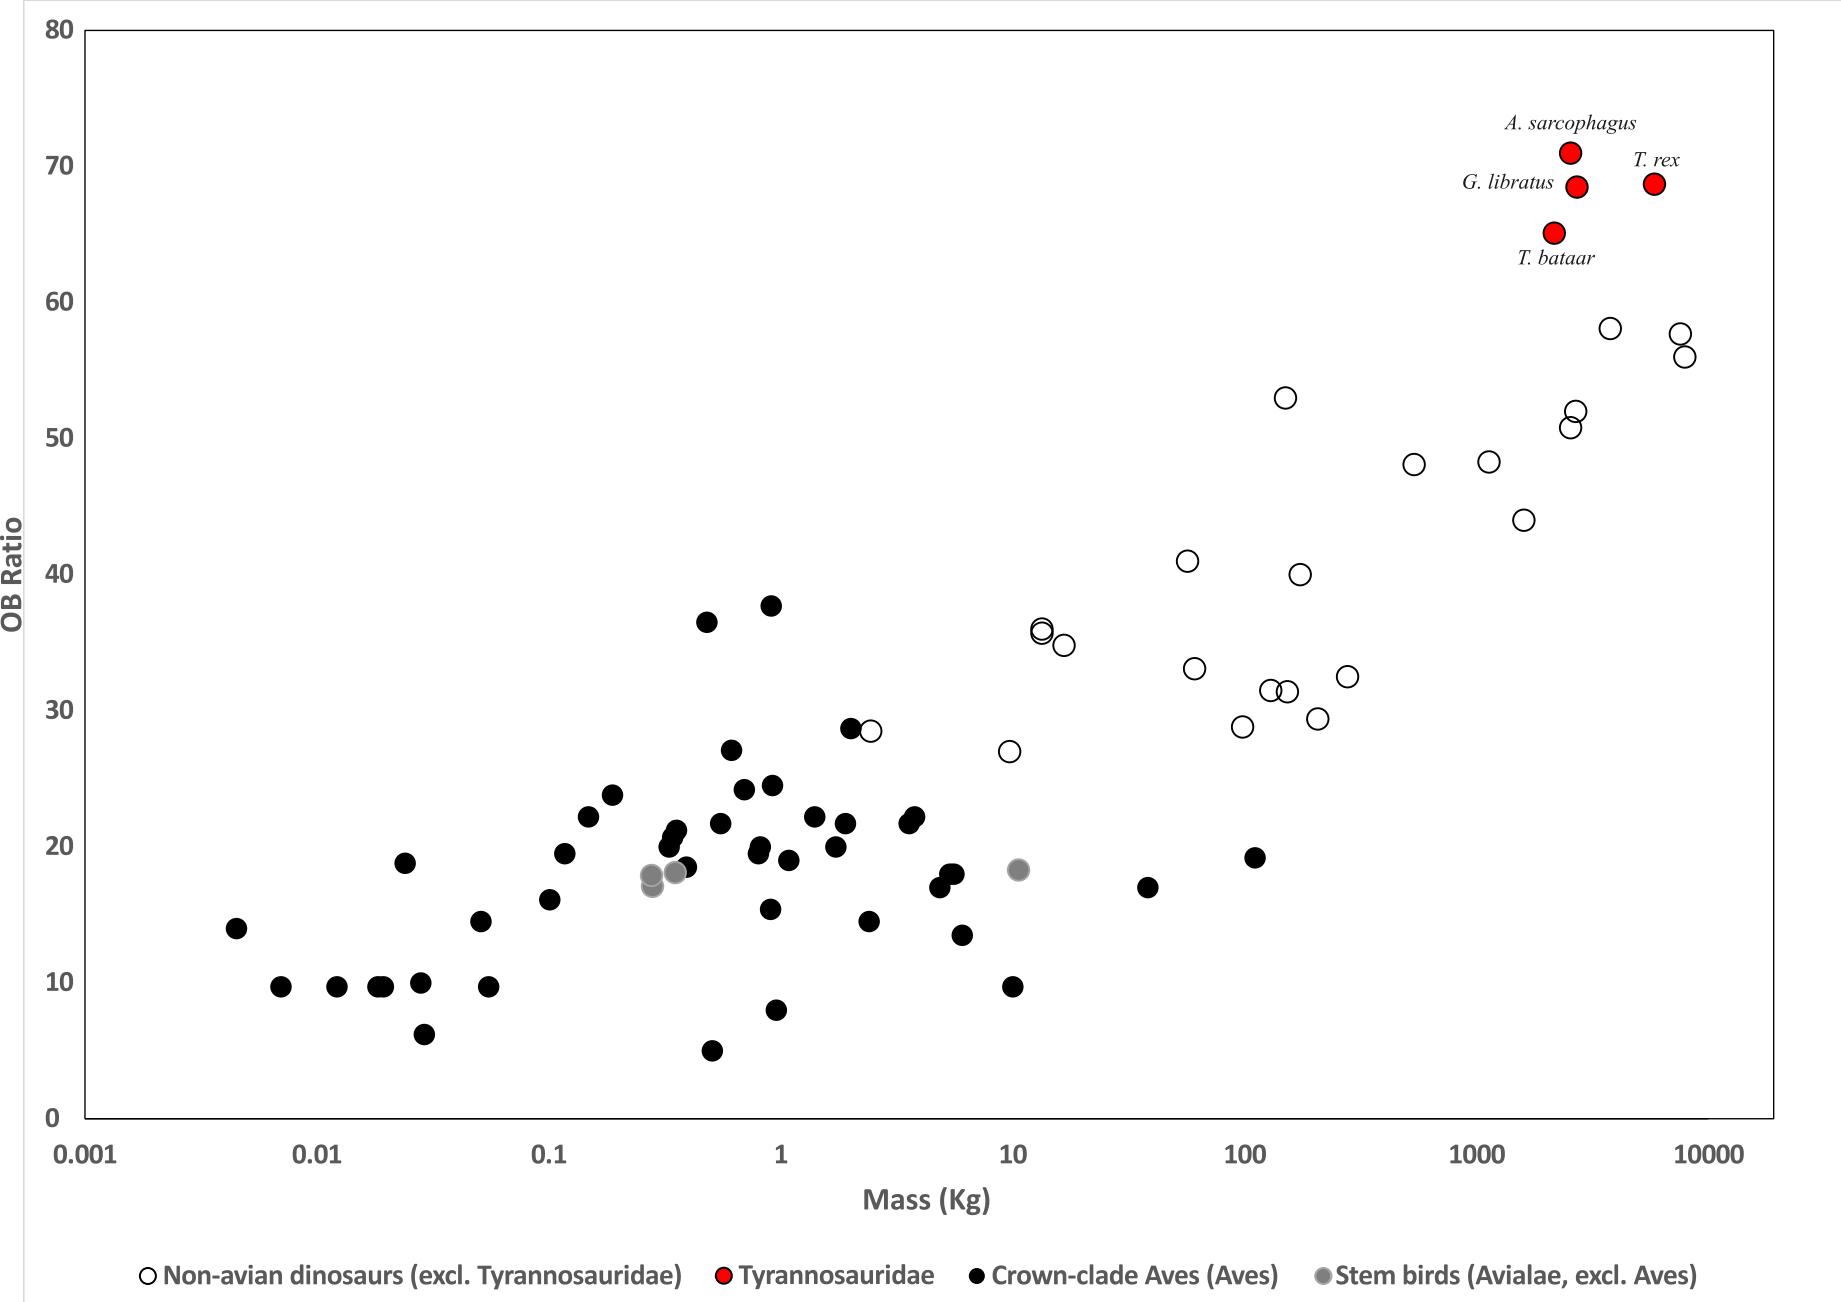

Body Mass vs. OR Repertoire Size in Extant Birds

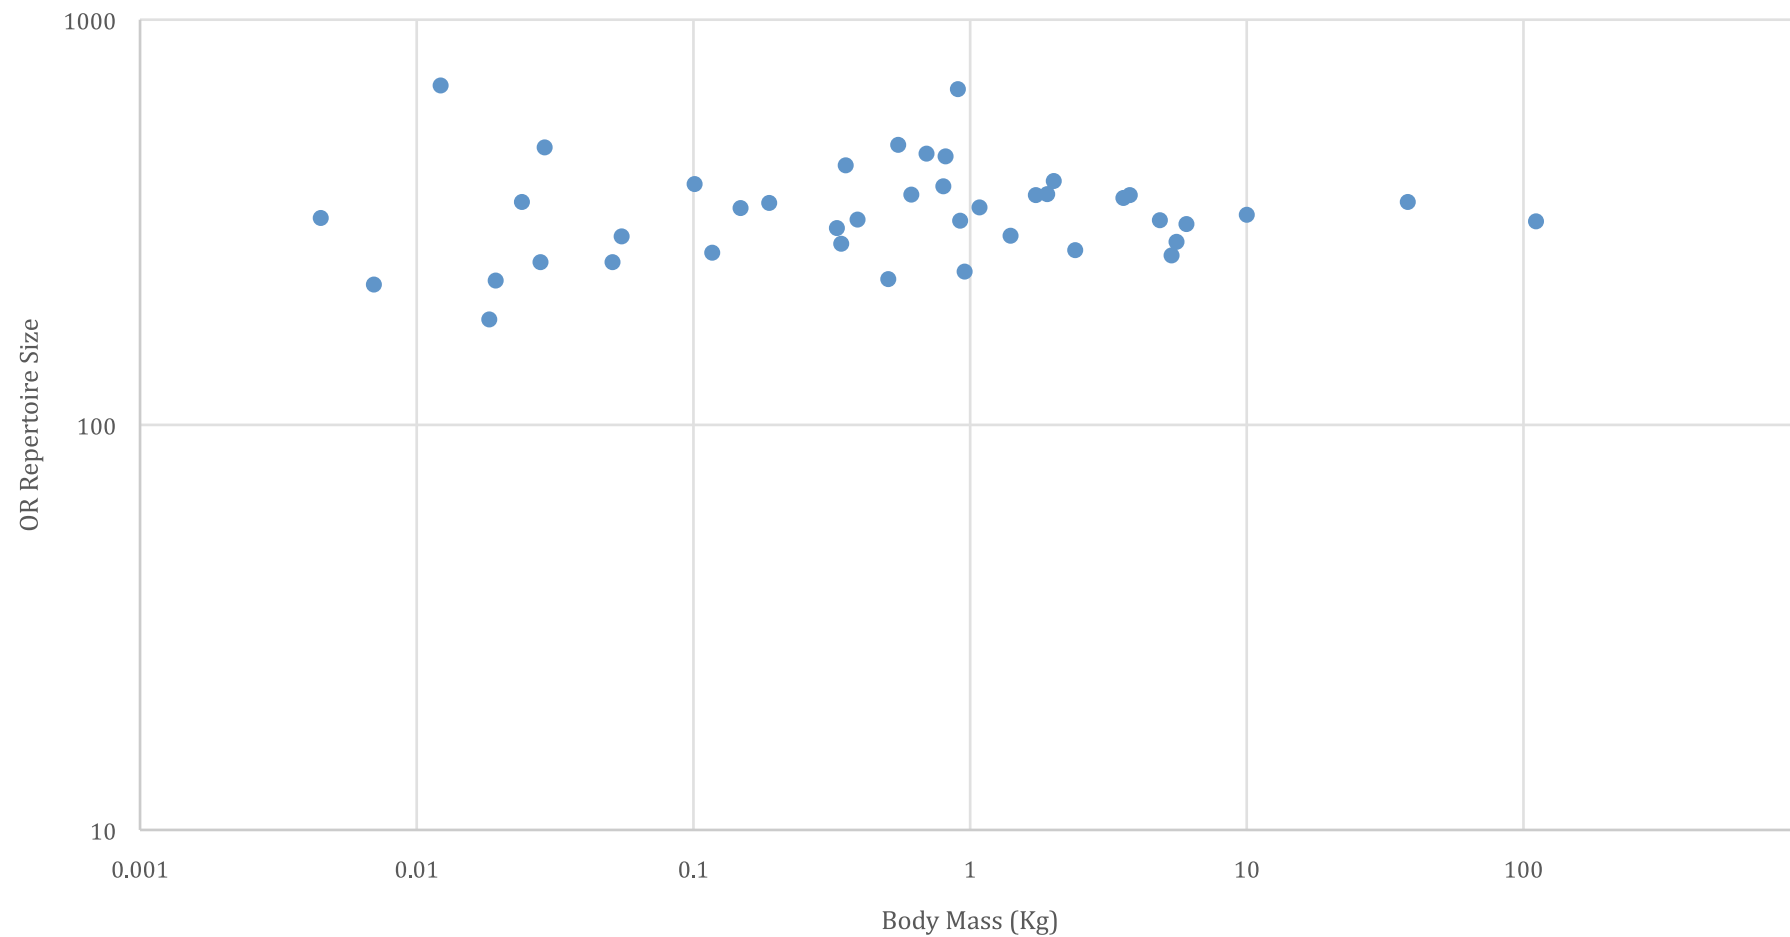

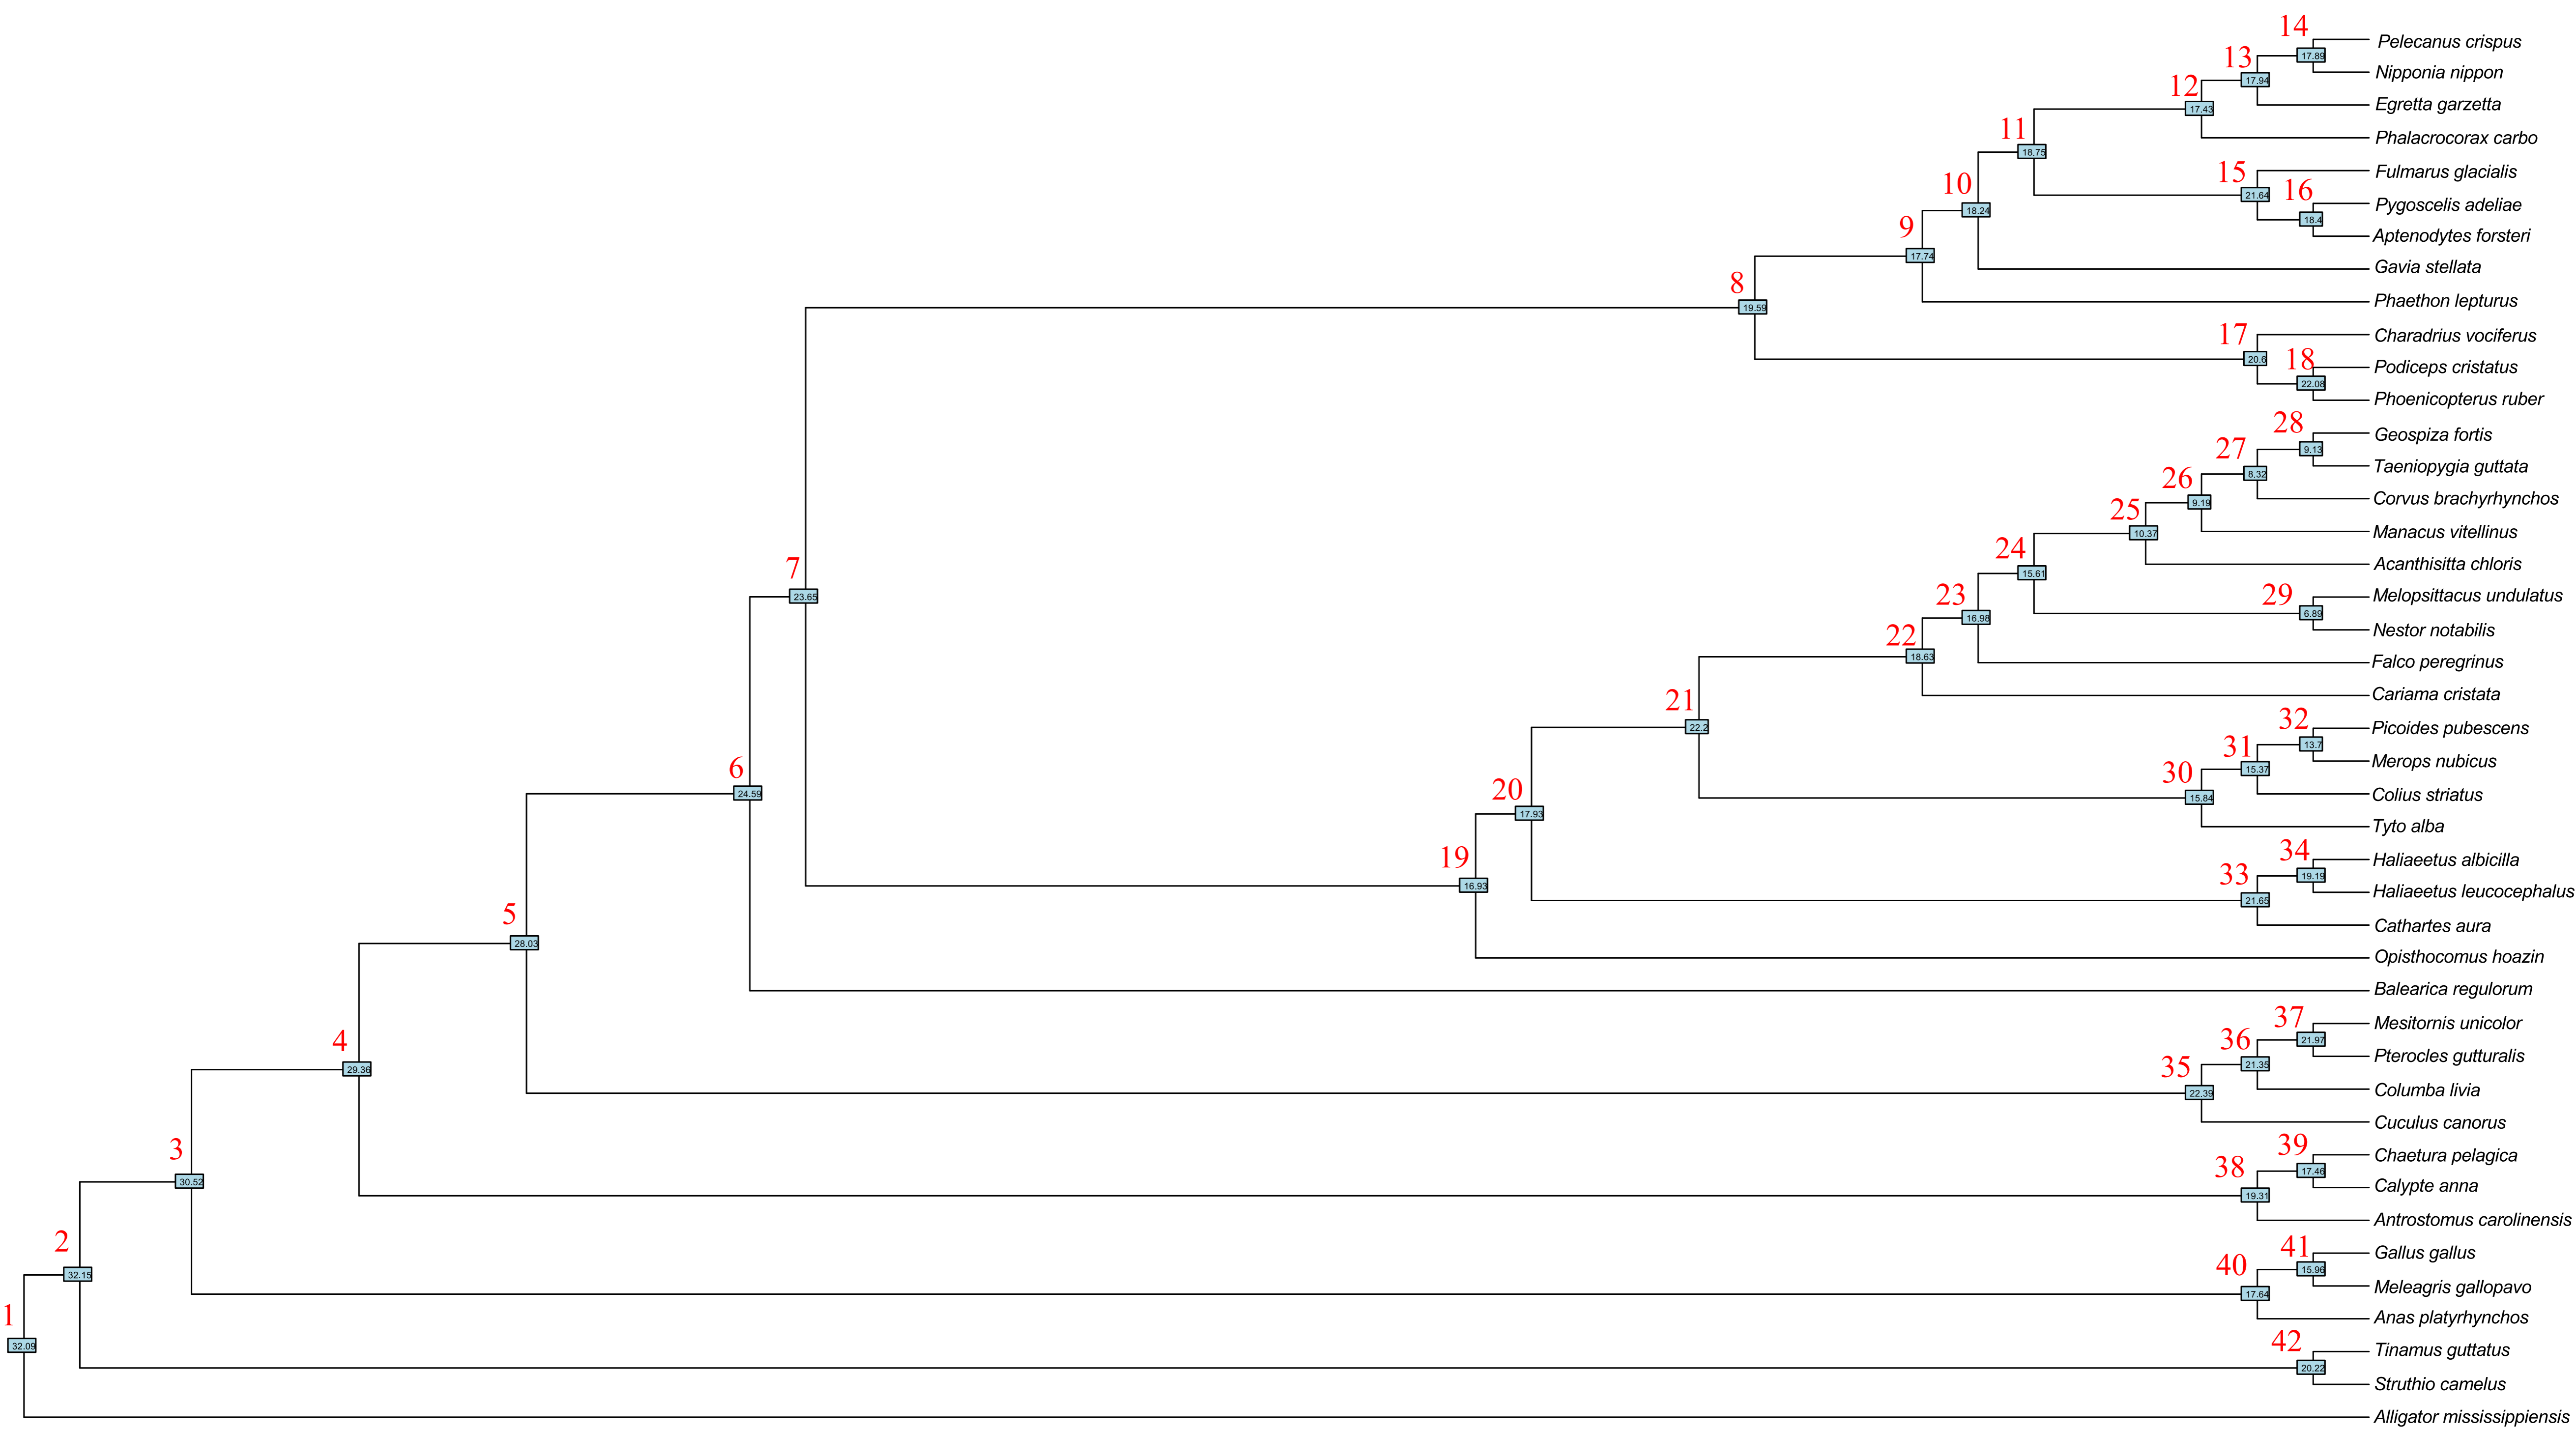

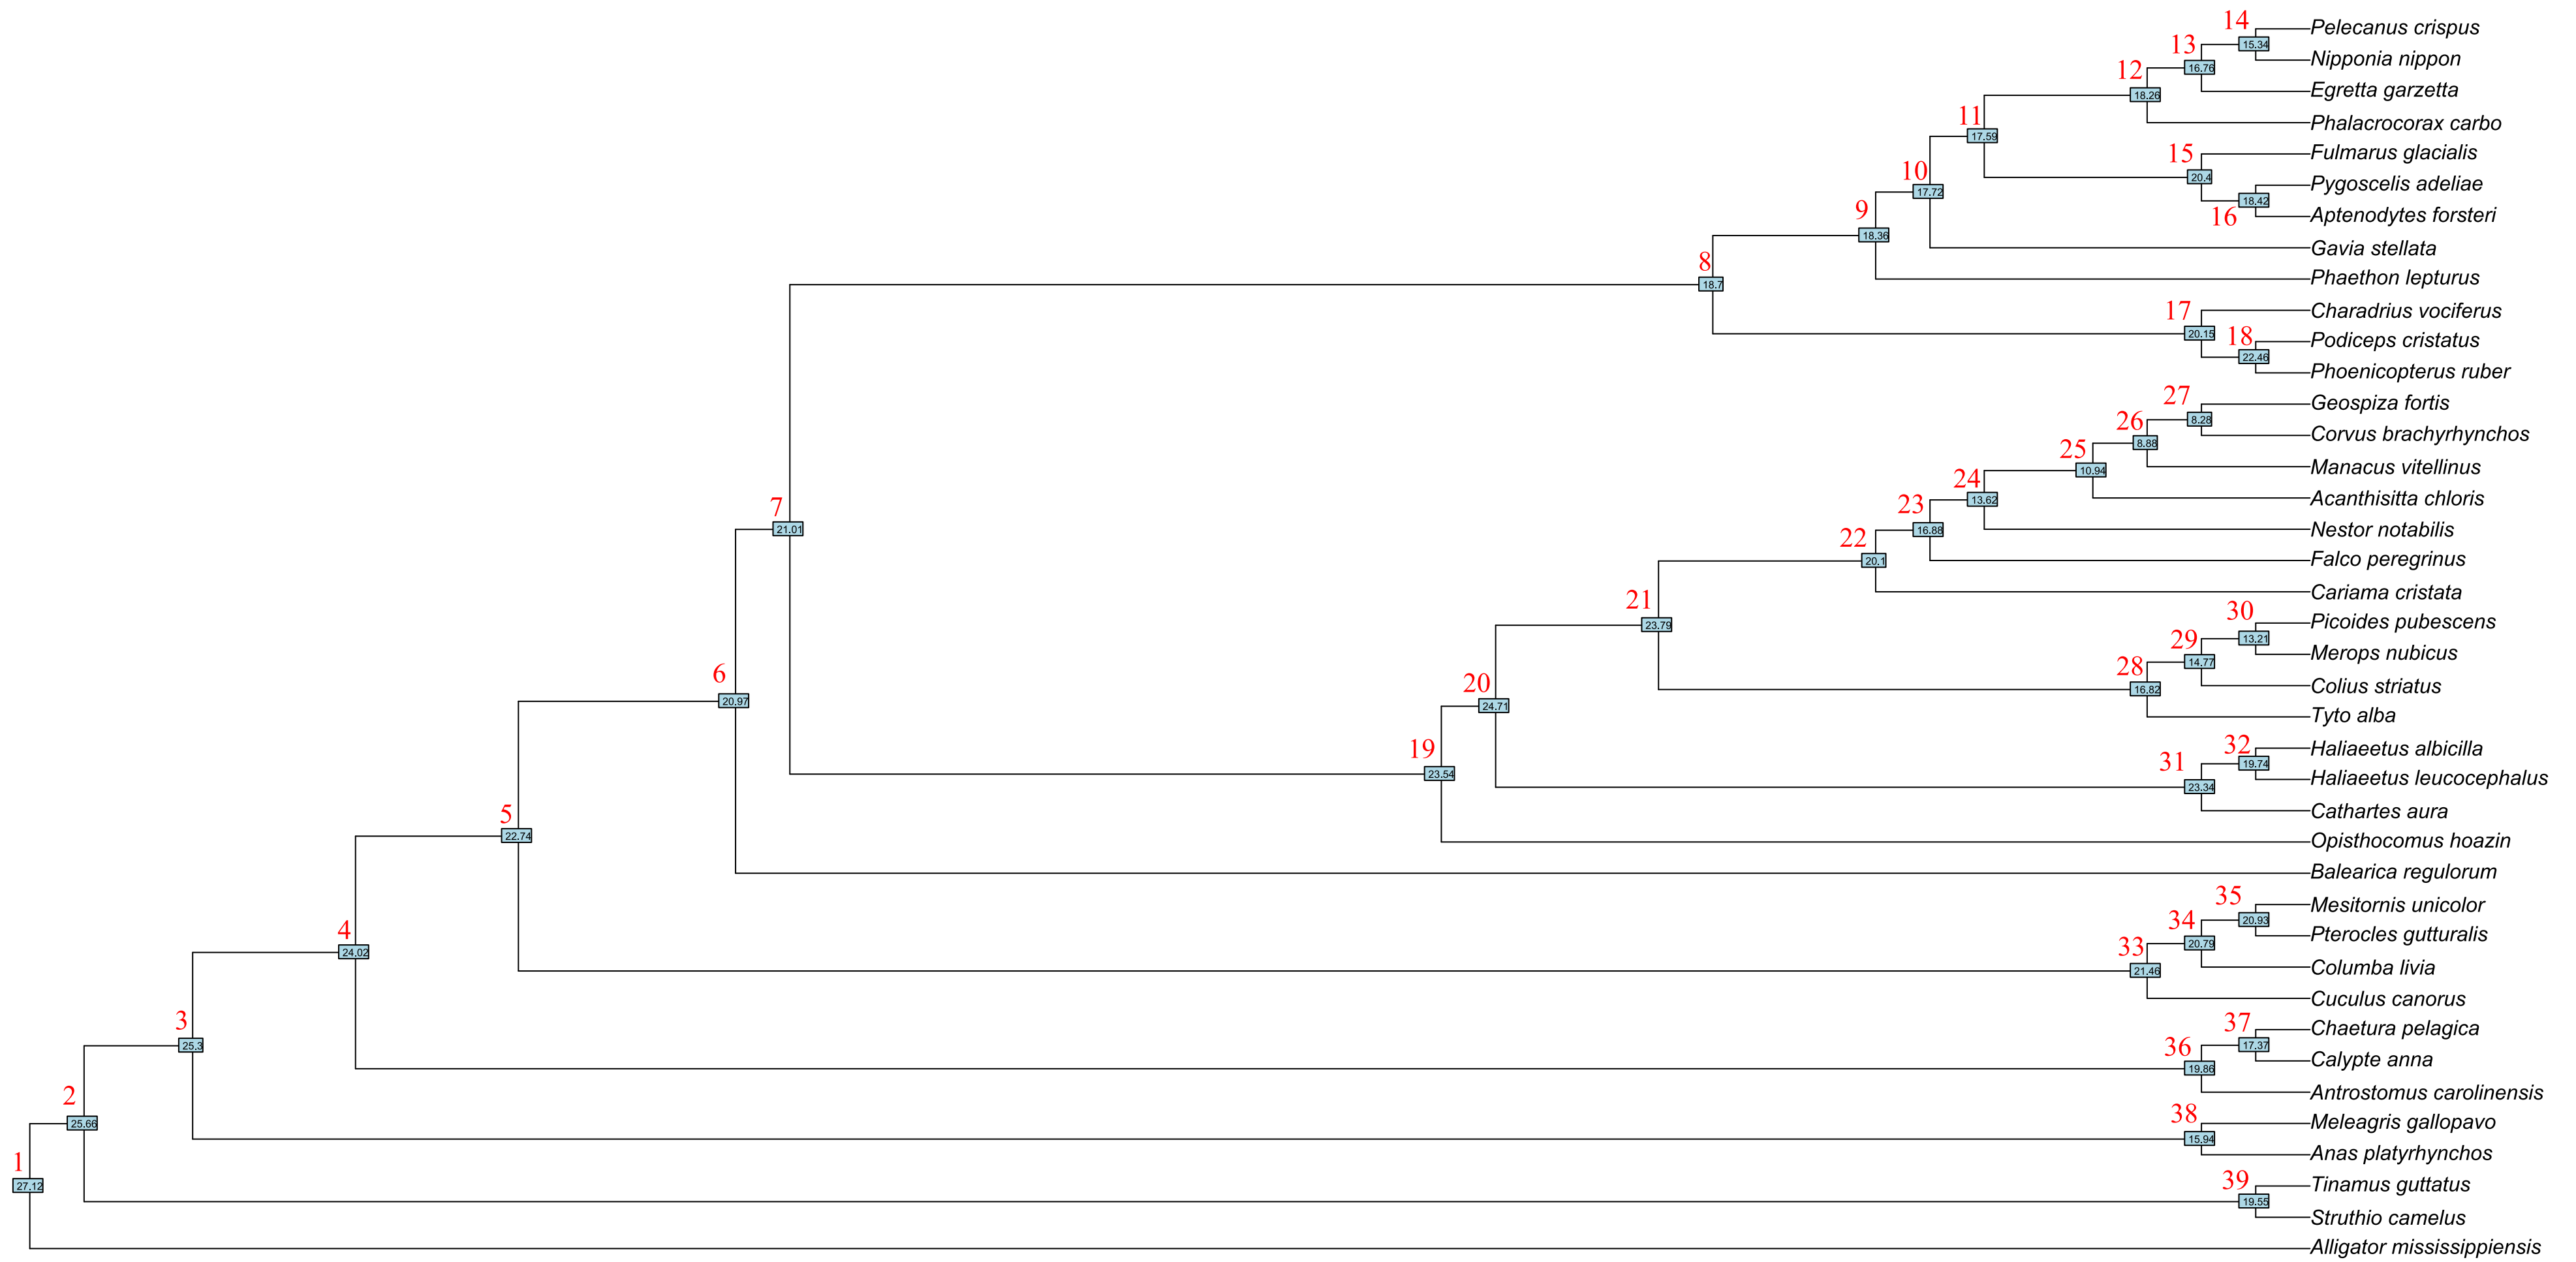

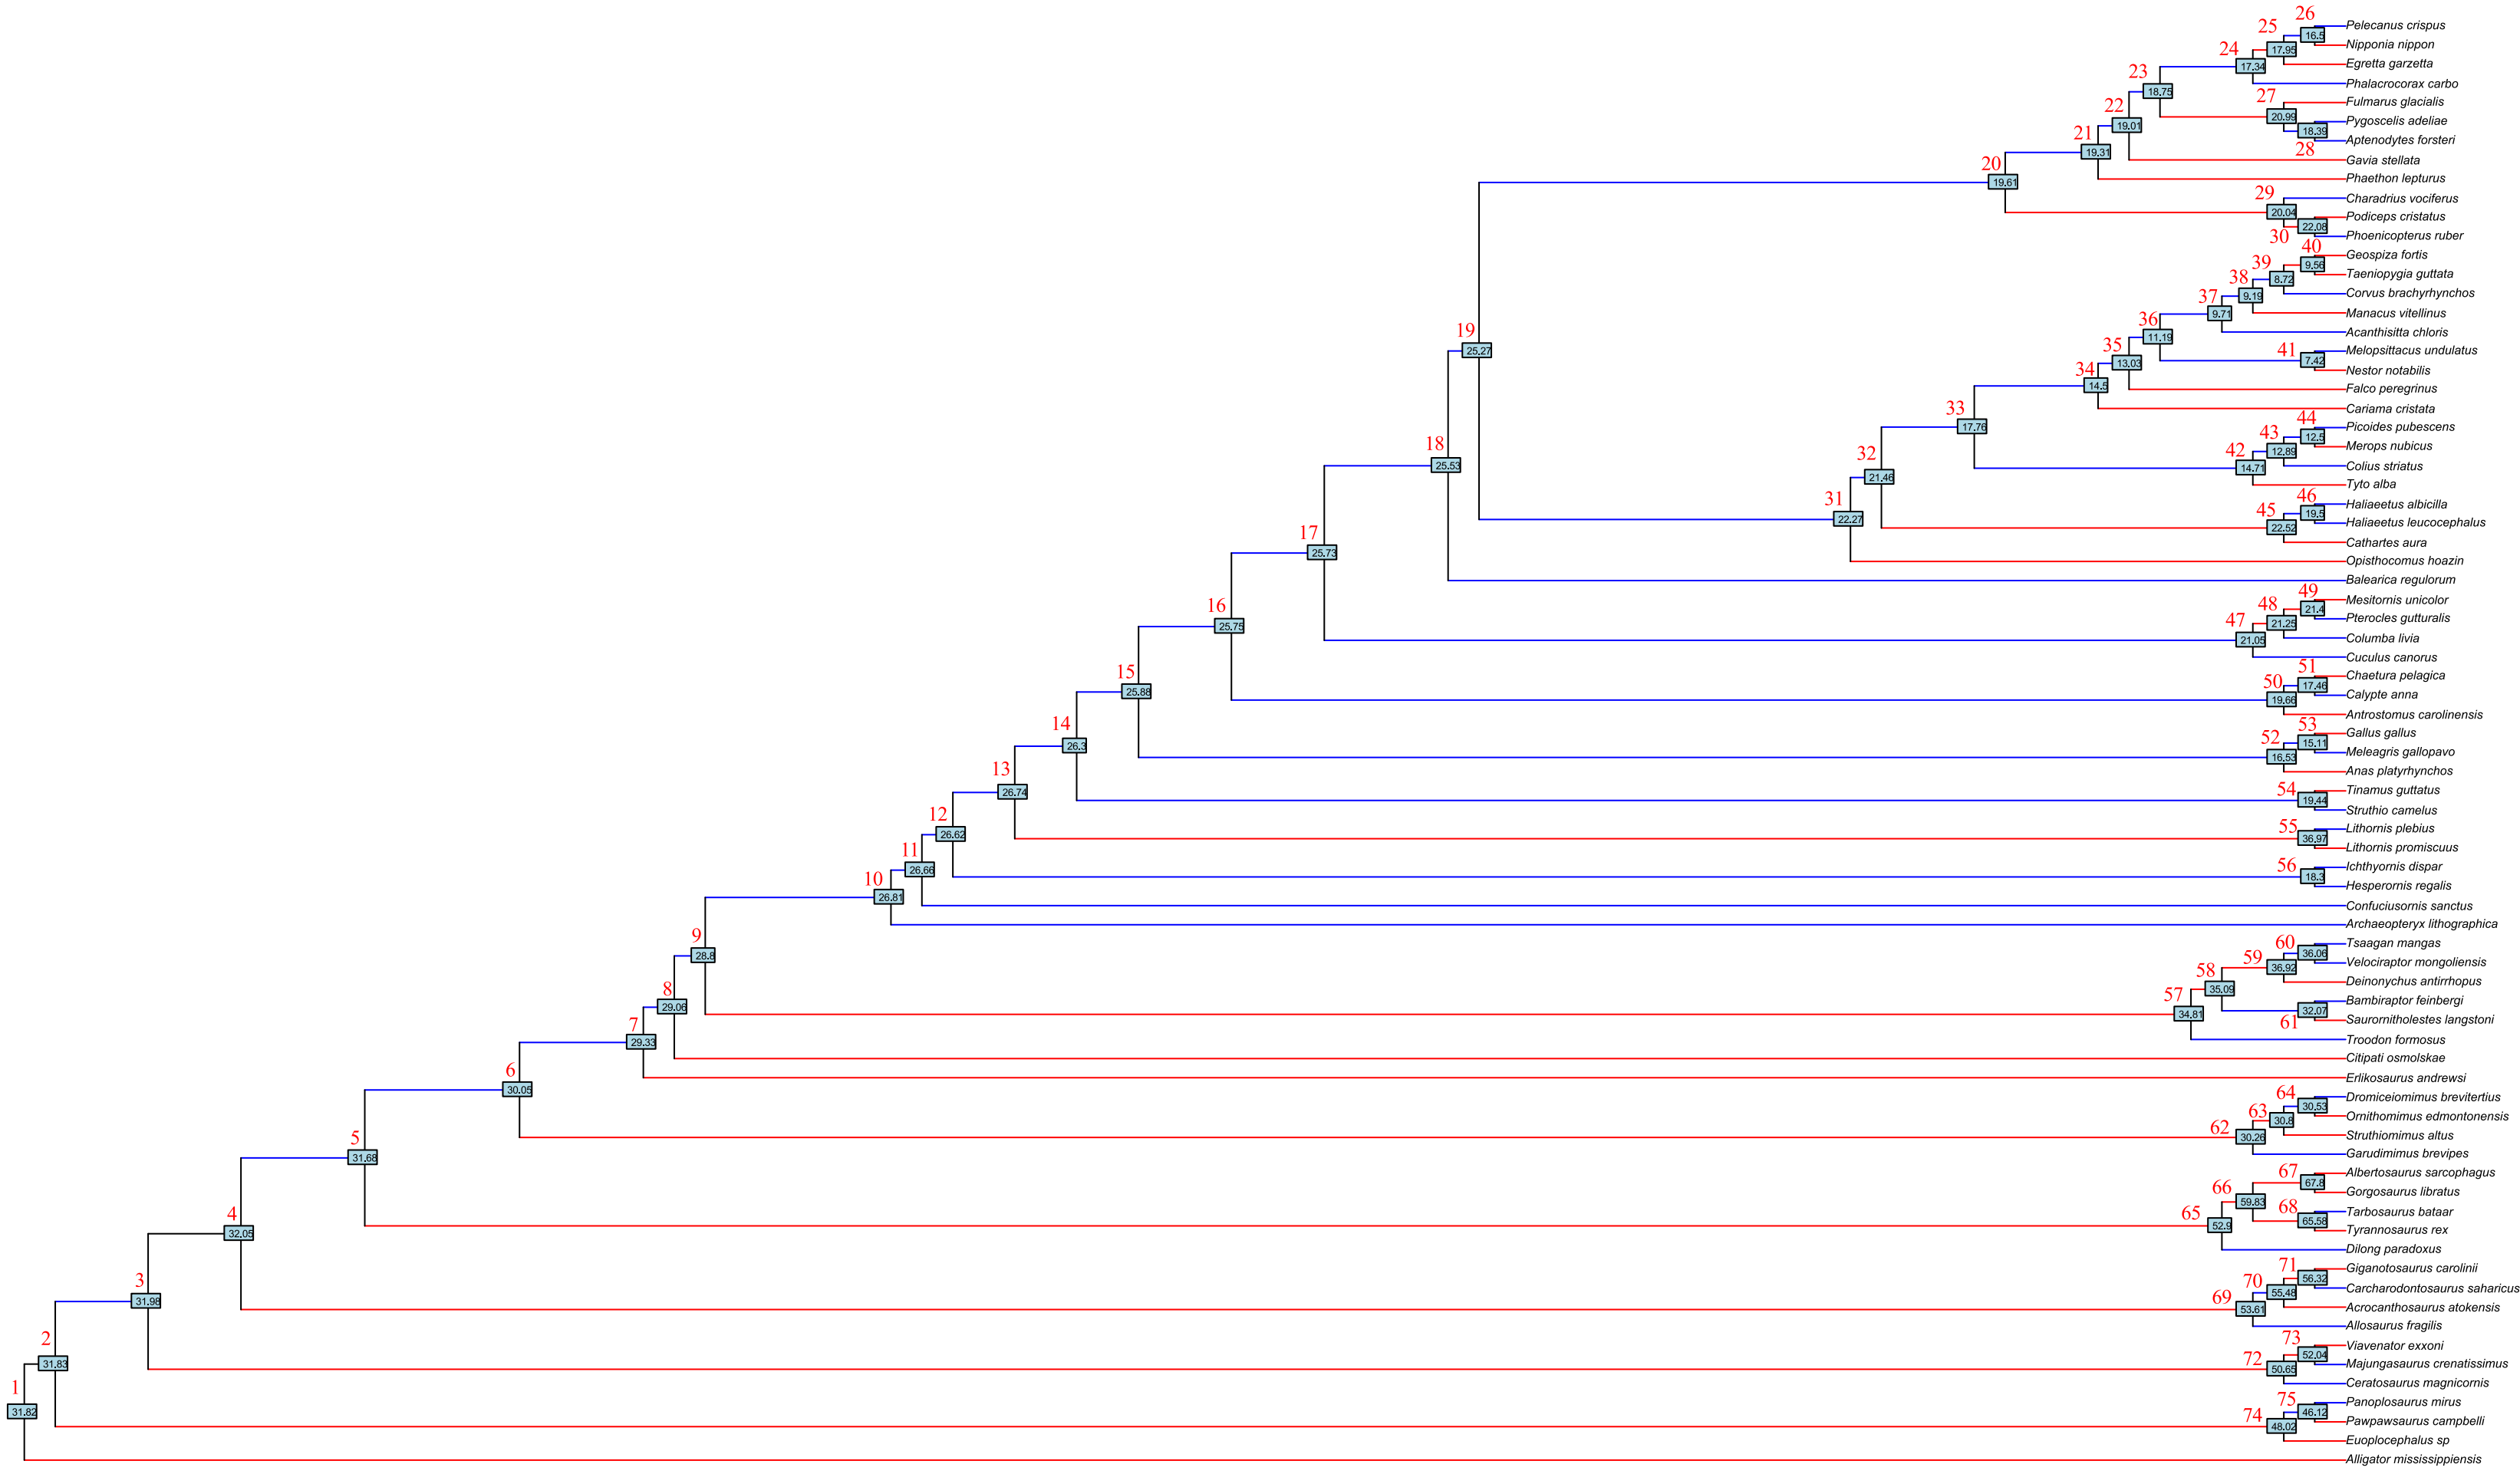



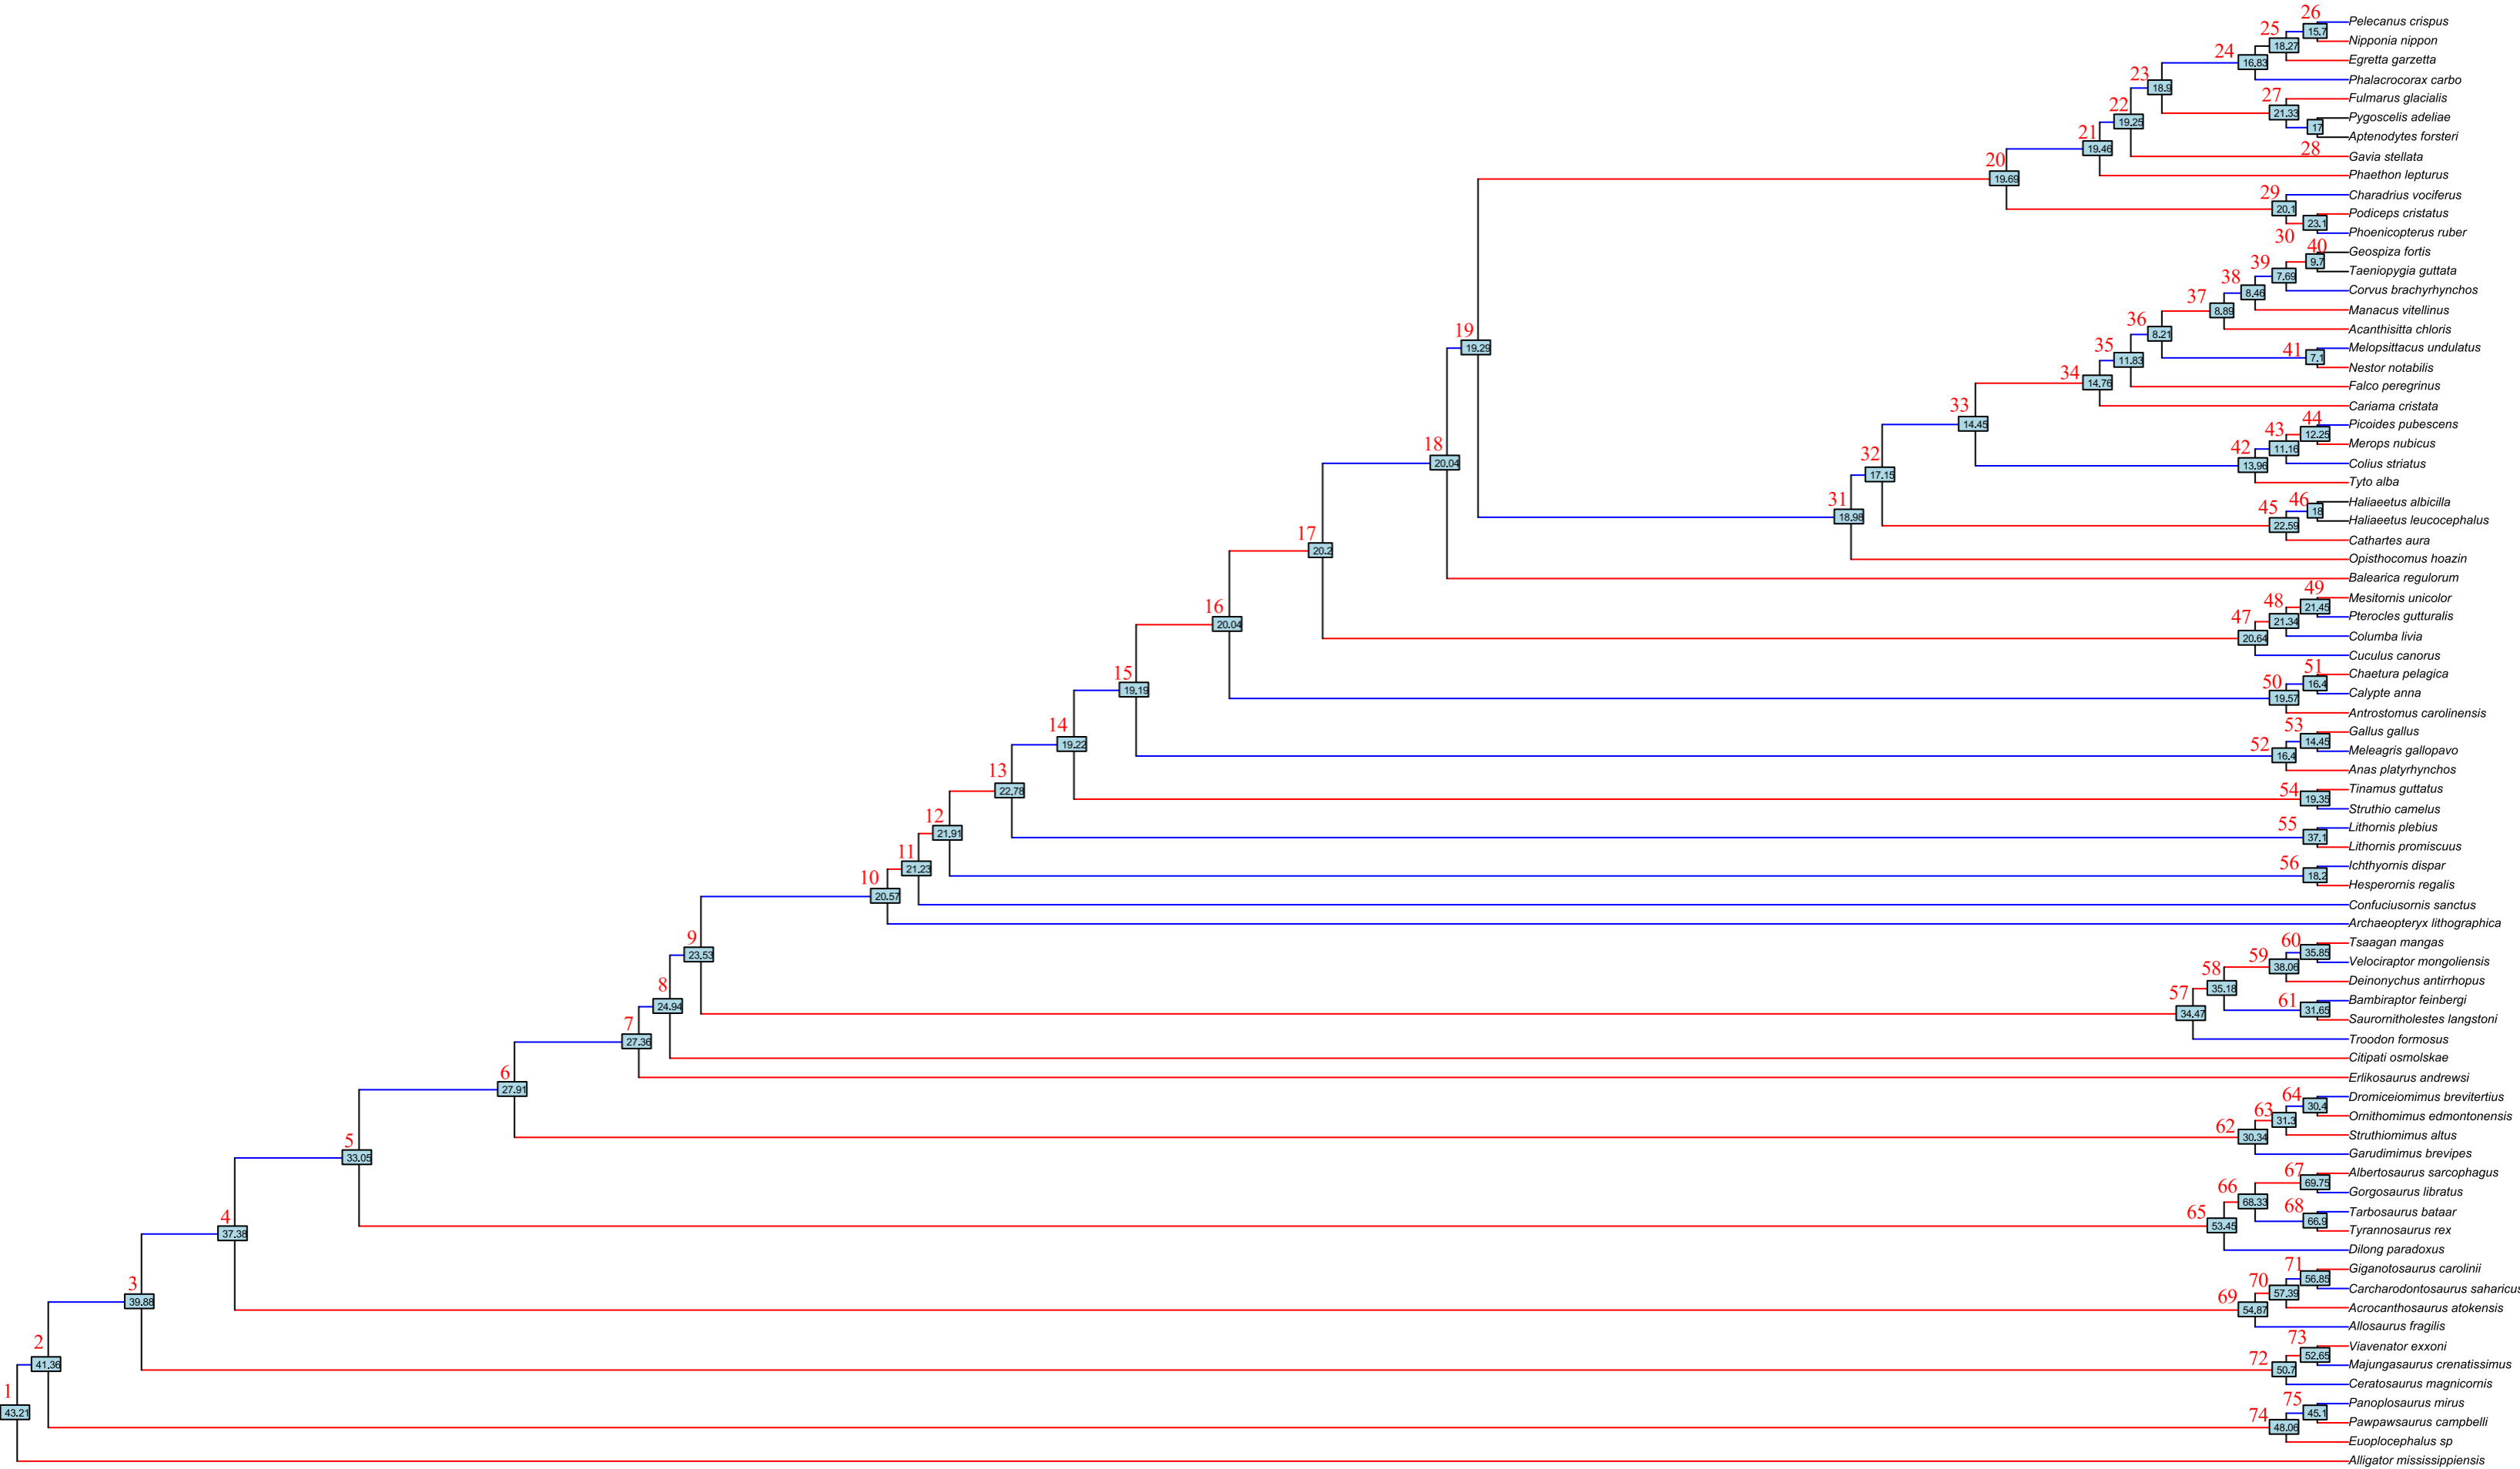

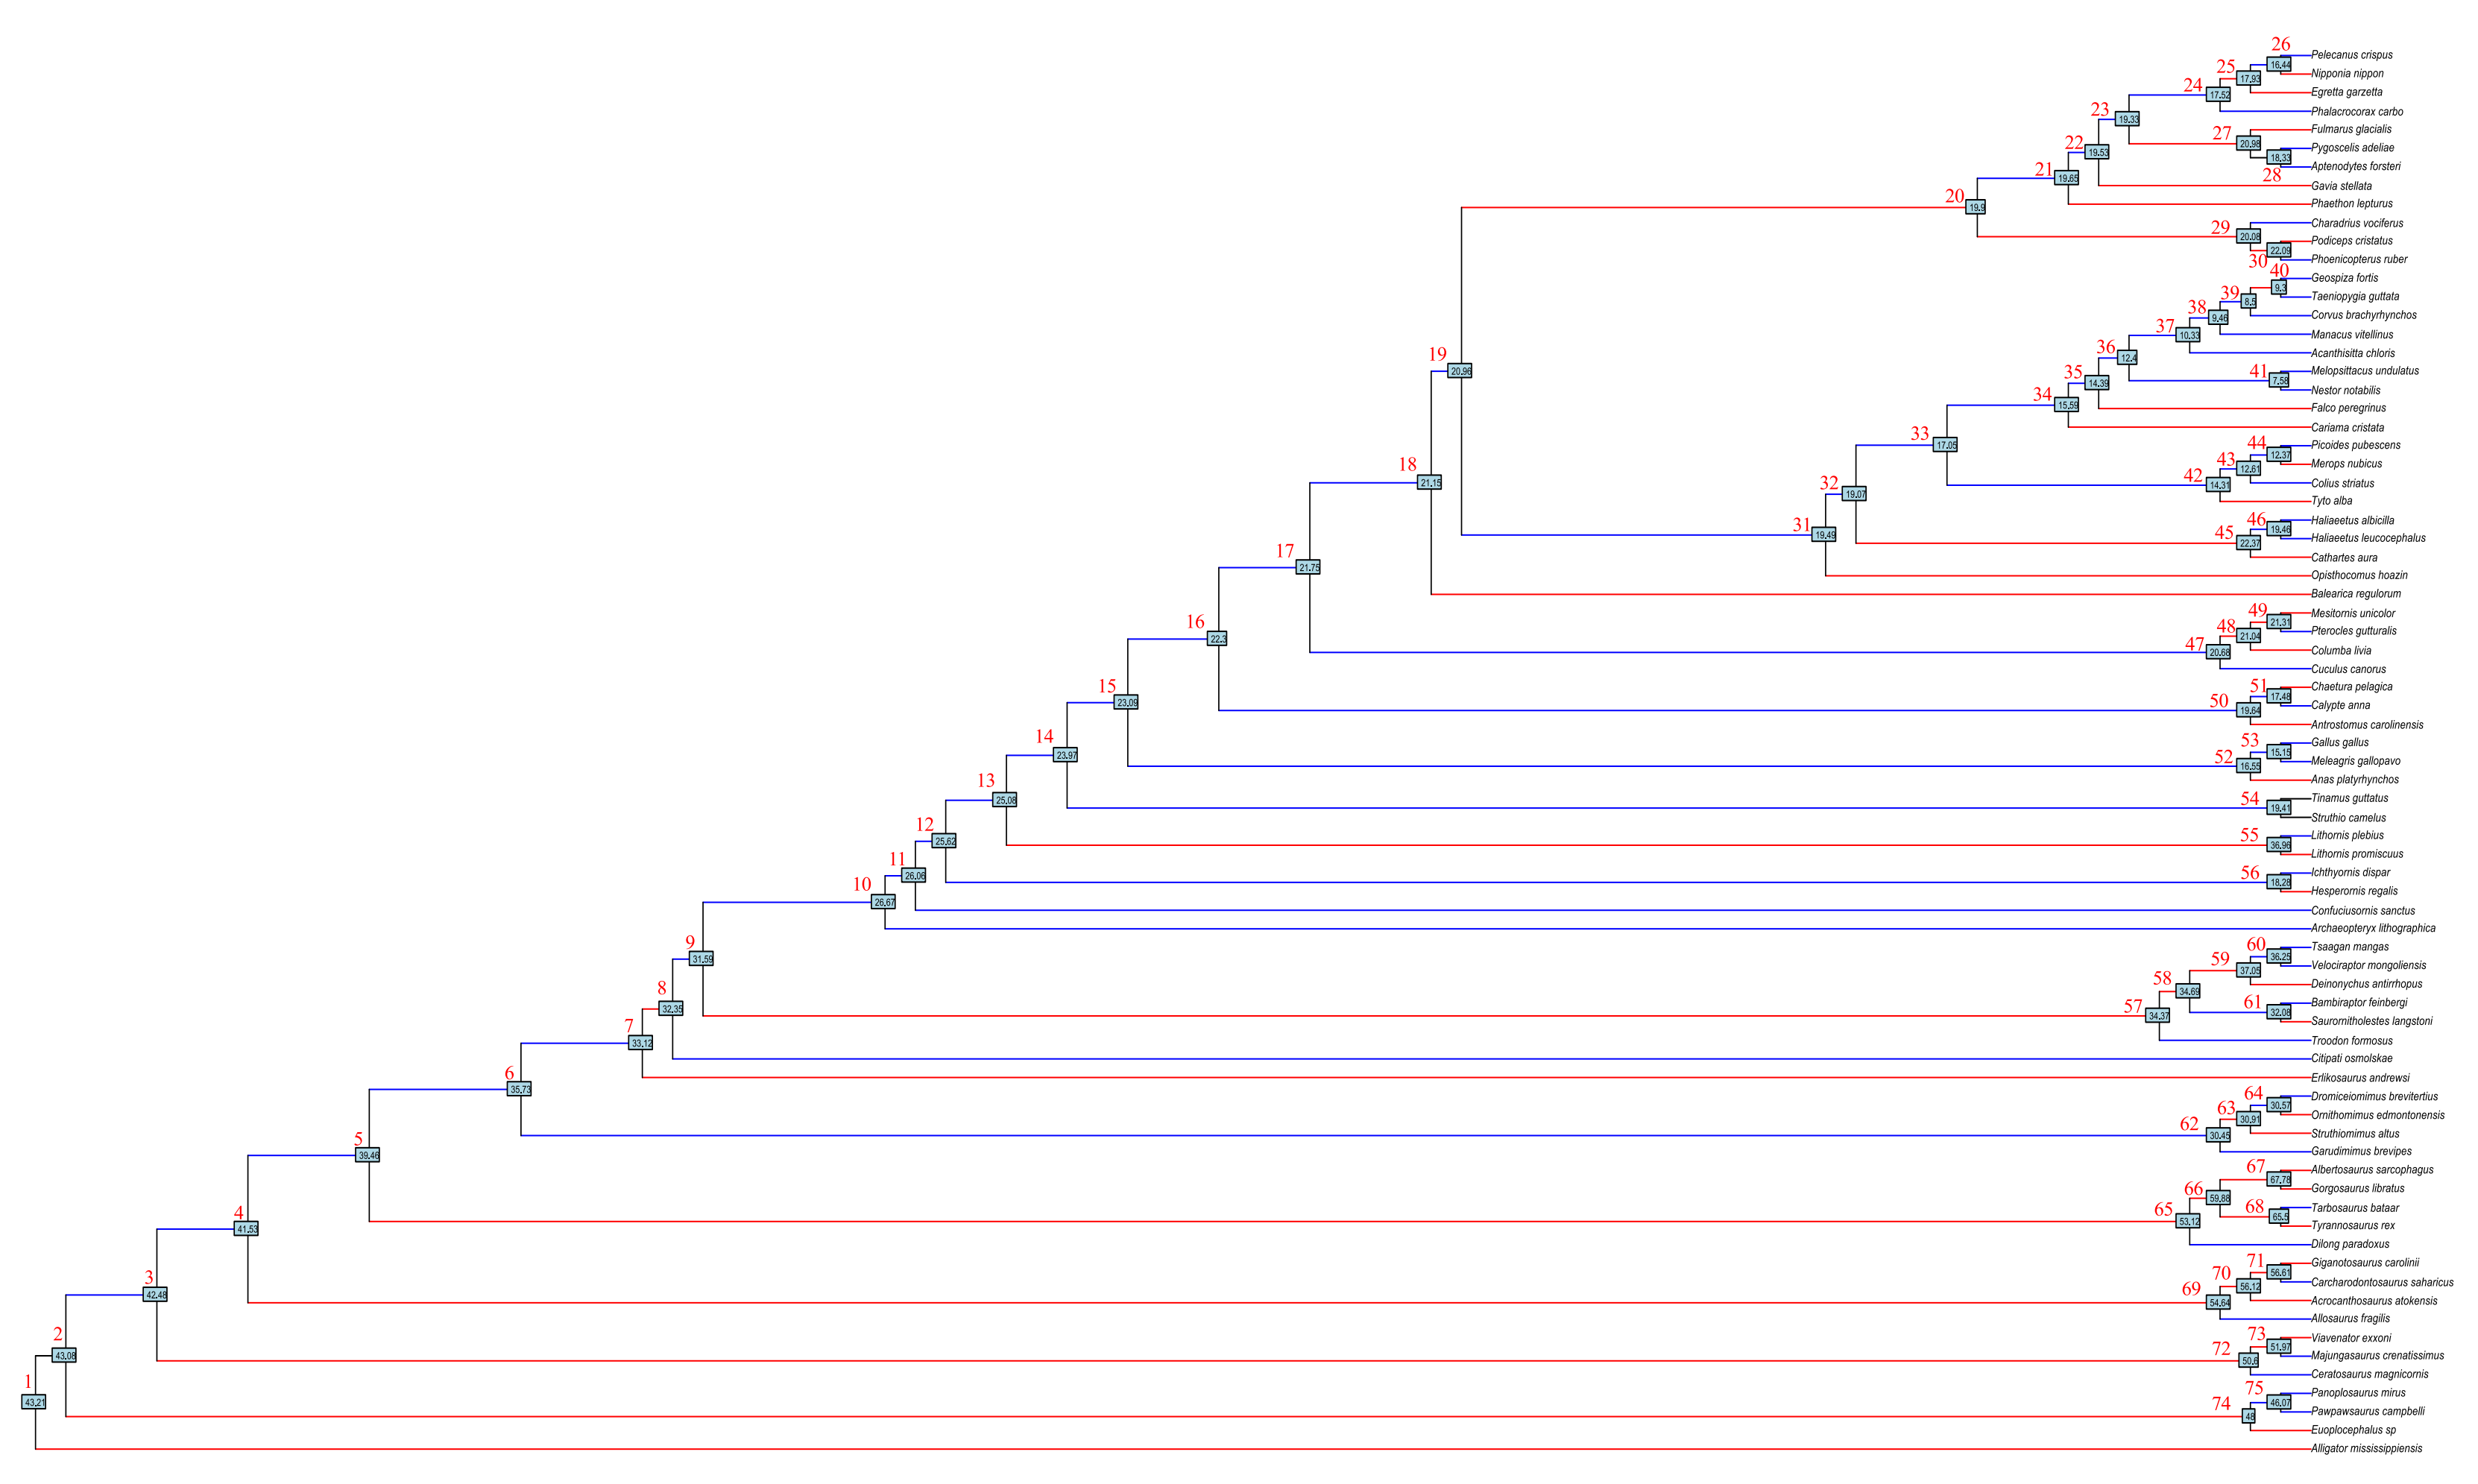

Supplement: rspb20190909supp1.pdf [file rspb20190909supp1.pdf]
